# Supplementary material for: TGF-β1 is associated with deficits in cognition and cerebral cortical thickness in first-episode schizophrenia
Source: PubMed Central journal article supplement — J Psychiatry Neurosci. 2022 Mar 17;47(2):E86–98. doi: 10.1503/jpn.210121 (PMC9259382; doi:10.1503/jpn.210121), 2022-03-17
Supplement: 210121-at-1.pdf [file 210121-at-1.pdf]

## Supplementary Figures

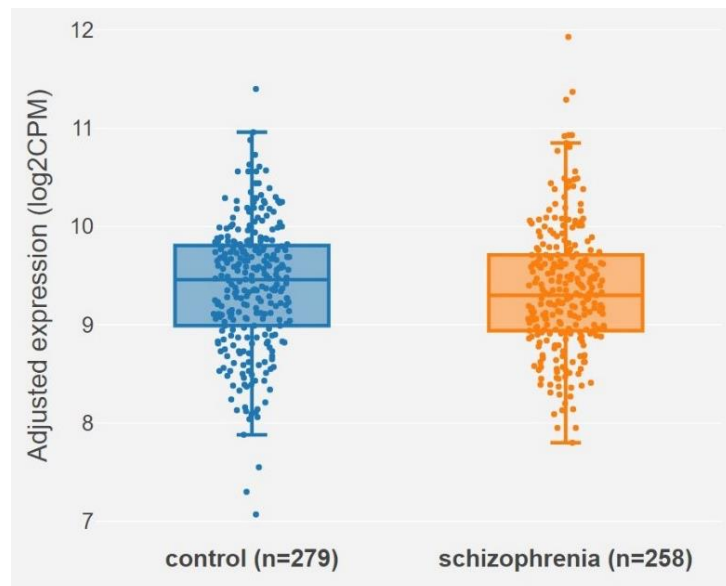

**Figure S1. TGF- $\beta$ 1 expression between schizophrenia patients and controls in the DLPFC.**

Post hoc test showed that TGF- $\beta$ 1 expression in DLPFC was not significantly changed in the SCZ group as compared to the control group ( $p > 0.05$ ) (based on CMC RNAseq data).

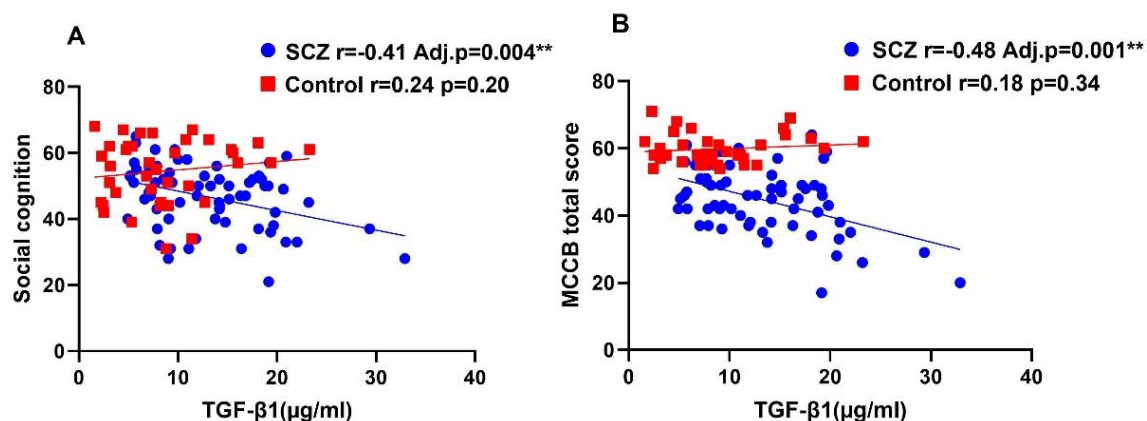

**Figure S2. Correlations of TGF- $\beta$ 1 with MCCB total score and social cognition. A.** TGF- $\beta$ 1 levels were negatively associated with social cognition scores in patients with schizophrenia but not in healthy controls. **B.** TGF- $\beta$ 1 levels were negatively associated with MCCB total scores in patients with schizophrenia but not in healthy controls. \*\* adj.  $p < 0.01$ .

**Table S1. Blood RNAseq DEGs**

| <b>Genes</b>  | <b>logFC</b>    | <b>t</b>       | <b>P.Value</b>    | <b>adj.P.Val</b> |
|---------------|-----------------|----------------|-------------------|------------------|
| <b>TGFB1</b>  | <b>0.24466</b>  | <b>3.2011</b>  | <b>0.0017526</b>  | <b>0.026029</b>  |
| <b>TGFBR1</b> | <b>-0.24416</b> | <b>-3.3447</b> | <b>0.0011</b>     | <b>0.019168</b>  |
| <b>TGFBR3</b> | <b>-0.45222</b> | <b>-4.0283</b> | <b>9.90E-05</b>   | <b>0.0044704</b> |
| <b>SREBF1</b> | <b>0.23124</b>  | <b>3.6089</b>  | <b>0.00044986</b> | <b>0.011104</b>  |
| <b>PXN</b>    | <b>0.21002</b>  | <b>3.1182</b>  | <b>0.0022789</b>  | <b>0.030937</b>  |
| <b>CSF1</b>   | <b>0.23581</b>  | <b>3.0153</b>  | <b>0.0031345</b>  | <b>0.037709</b>  |
| <b>ENG</b>    | <b>0.18446</b>  | <b>2.9388</b>  | <b>0.0039539</b>  | <b>0.044091</b>  |
| CCDC117       | -0.33974        | -7.7609        | 3.13E-12          | 4.20E-08         |
| CNOT6L        | -0.32846        | -6.866         | 3.13E-10          | 2.10E-06         |
| FYTTD1        | -0.31476        | -6.4479        | 2.49E-09          | 1.04E-05         |
| FOSB          | -0.76268        | -6.4041        | 3.08E-09          | 1.04E-05         |
| BZW1          | -0.28113        | -6.3537        | 3.94E-09          | 1.06E-05         |
| PTPN4         | -0.42287        | -6.3071        | 4.94E-09          | 1.11E-05         |
| DNAJB9        | -0.34962        | -6.1367        | 1.12E-08          | 2.15E-05         |
| ZNF580        | 0.3861          | 6.1037         | 1.32E-08          | 2.21E-05         |
| TMEM64        | -0.43168        | -6.0395        | 1.79E-08          | 2.66E-05         |
| ZBTB44        | -0.31339        | -5.9872        | 2.29E-08          | 3.07E-05         |
| AGPS          | -0.29044        | -5.935         | 2.93E-08          | 3.34E-05         |
| PIGK          | -0.37905        | -5.9307        | 2.99E-08          | 3.34E-05         |
| AIDA          | -0.31382        | -5.8508        | 4.34E-08          | 4.35E-05         |
| NRAS          | -0.33572        | -5.8415        | 4.54E-08          | 4.35E-05         |
| MYPOP         | 0.34748         | 5.7062         | 8.51E-08          | 7.40E-05         |
| CITED4        | 0.54581         | 5.6713         | 9.99E-08          | 7.40E-05         |
| PDE4D         | -0.48785        | -5.6622        | 1.04E-07          | 7.40E-05         |
| NOL3          | 0.44433         | 5.6612         | 1.05E-07          | 7.40E-05         |
| RNF14         | -0.26626        | -5.6611        | 1.05E-07          | 7.40E-05         |
| DESI2         | -0.28261        | -5.5894        | 1.45E-07          | 9.76E-05         |
| RAP1B         | -0.27661        | -5.5251        | 1.95E-07          | 0.00012413       |
| FBXO45        | -0.29997        | -5.5156        | 2.03E-07          | 0.00012413       |
| NPIP11        | 0.57847         | 5.4899         | 2.29E-07          | 0.00012826       |
| TESMIN        | 0.31469         | 5.4892         | 2.29E-07          | 0.00012826       |
| INSIG1        | -0.27472        | -5.4566        | 2.66E-07          | 0.00014262       |
| NAA30         | -0.28067        | -5.4092        | 3.29E-07          | 0.0001697        |
| NXT2          | -0.49213        | -5.3988        | 3.44E-07          | 0.00017125       |
| CLDN9         | 0.6294          | 5.3542         | 4.20E-07          | 0.00020153       |
| UHMK1         | -0.32817        | -5.3149        | 5.01E-07          | 0.00023126       |
| UBXN10        | -0.57179        | -5.3078        | 5.17E-07          | 0.00023126       |

Appendix 1 to Pan S, Zhou Y, Yan L, et al. TGF- $\beta$ 1 is associated with deficits in cognition and cerebral cortical thickness in first-episode schizophrenia. *J Psychiatry Neurosci* 2022. doi: 10.1503/jpn.210121  
 Copyright © 2022 The Author(s) or their employer(s).

To receive this resource in an accessible format, please contact us at [cmajgroup@cmaj.ca](mailto:cmajgroup@cmaj.ca).

Online appendices are unedited and posted as supplied by the authors.

|           |          |         |          |            |
|-----------|----------|---------|----------|------------|
| CYSLTR2   | -0.49868 | -5.2942 | 5.49E-07 | 0.00023773 |
| PRKACB    | -0.43368 | -5.2654 | 6.23E-07 | 0.00024669 |
| F8A2      | 0.438    | 5.2571  | 6.47E-07 | 0.00024669 |
| TFAM      | -0.29478 | -5.2541 | 6.55E-07 | 0.00024669 |
| RBM7      | -0.28495 | -5.2507 | 6.65E-07 | 0.00024669 |
| ABHD17B   | -0.25905 | -5.2468 | 6.77E-07 | 0.00024669 |
| CMPK1     | -0.28779 | -5.2458 | 6.80E-07 | 0.00024669 |
| CMTR2     | -0.3591  | -5.2334 | 7.18E-07 | 0.00025367 |
| HS2ST1    | -0.30863 | -5.1788 | 9.13E-07 | 0.0003142  |
| SREK1IP1  | -0.36241 | -5.1561 | 1.01E-06 | 0.00033826 |
| MZF1      | 0.27431  | 5.1466  | 1.05E-06 | 0.00034053 |
| FMC1      | 0.7909   | 5.1434  | 1.07E-06 | 0.00034053 |
| F8A3      | 0.32752  | 5.1014  | 1.28E-06 | 0.00039931 |
| SEPTIN11  | -0.26475 | -5.0868 | 1.36E-06 | 0.00041573 |
| ZBTB33    | -0.3058  | -5.0549 | 1.56E-06 | 0.00045868 |
| THAP12    | -0.30469 | -5.0538 | 1.57E-06 | 0.00045868 |
| ATF7-NPFF | 0.51151  | 5.0434  | 1.64E-06 | 0.00046675 |
| TM9SF3    | -0.21735 | -5.0375 | 1.69E-06 | 0.00046675 |
| GALNS     | 0.28001  | 5.0303  | 1.74E-06 | 0.00046675 |
| MSANTD4   | -0.26164 | -5.0228 | 1.80E-06 | 0.00046675 |
| CLIP3     | 0.46642  | 5.021   | 1.81E-06 | 0.00046675 |
| RIPOR1    | 0.30775  | 5.0197  | 1.82E-06 | 0.00046675 |
| SHISA8    | 0.72704  | 5.014   | 1.87E-06 | 0.00046675 |
| LNPK      | -0.24414 | -5.0125 | 1.88E-06 | 0.00046675 |
| SH2D1B    | -0.63477 | -4.9958 | 2.02E-06 | 0.00049154 |
| TRAM1     | -0.30023 | -4.9919 | 2.05E-06 | 0.00049154 |
| CHIC1     | -0.34098 | -4.9434 | 2.52E-06 | 0.00059424 |
| NLGN3     | 0.4036   | 4.9275  | 2.70E-06 | 0.00062481 |
| UTP23     | -0.26542 | -4.9151 | 2.84E-06 | 0.00062952 |
| TNFSF4    | -0.43715 | -4.9113 | 2.89E-06 | 0.00062952 |
| PIK3R3    | -0.43572 | -4.9087 | 2.92E-06 | 0.00062952 |
| IMPAD1    | -0.23554 | -4.9077 | 2.94E-06 | 0.00062952 |
| SH2D1A    | -0.37825 | -4.9056 | 2.96E-06 | 0.00062952 |
| IMPACT    | -0.30293 | -4.9026 | 3.00E-06 | 0.00062952 |
| UBE2Q2    | -0.25493 | -4.8907 | 3.16E-06 | 0.00064763 |
| SAMD1     | 0.26498  | 4.8886  | 3.18E-06 | 0.00064763 |
| UBL3      | -0.33085 | -4.8666 | 3.49E-06 | 0.00067805 |
| FBRSL1    | 0.29083  | 4.8654  | 3.51E-06 | 0.00067805 |
| GABBR1    | 0.38031  | 4.8643  | 3.53E-06 | 0.00067805 |
| TBL1XR1   | -0.26772 | -4.8607 | 3.58E-06 | 0.00067805 |
| C8orf58   | 0.30324  | 4.8605  | 3.59E-06 | 0.00067805 |

Appendix 1 to Pan S, Zhou Y, Yan L, et al. TGF- $\beta$ 1 is associated with deficits in cognition and cerebral cortical thickness in first-episode schizophrenia. *J Psychiatry Neurosci* 2022. doi: 10.1503/jpn.210121  
 Copyright © 2022 The Author(s) or their employer(s).

To receive this resource in an accessible format, please contact us at [cmajgroup@cmaj.ca](mailto:cmajgroup@cmaj.ca).

Online appendices are unedited and posted as supplied by the authors.

|              |          |         |          |            |
|--------------|----------|---------|----------|------------|
| KRTAP5-1     | 0.72654  | 4.8481  | 3.78E-06 | 0.00070444 |
| TCF7L1       | 0.40127  | 4.8379  | 3.94E-06 | 0.00072513 |
| FAM209A      | 0.41051  | 4.8311  | 4.06E-06 | 0.00073291 |
| IKZF2        | -0.51915 | -4.829  | 4.09E-06 | 0.00073291 |
| REST         | -0.24308 | -4.8074 | 4.48E-06 | 0.00079151 |
| ARMC1        | -0.27914 | -4.8022 | 4.58E-06 | 0.00079151 |
| SHFL         | 0.28831  | 4.8013  | 4.60E-06 | 0.00079151 |
| CYCS         | -0.32636 | -4.7966 | 4.69E-06 | 0.00079675 |
| CASP3        | -0.33378 | -4.7912 | 4.80E-06 | 0.00080489 |
| GPSM1        | 0.33154  | 4.7671  | 5.30E-06 | 0.00086863 |
| LOC101927837 | 0.25038  | 4.767   | 5.31E-06 | 0.00086863 |
| STYX         | -0.28599 | -4.7591 | 5.48E-06 | 0.00088715 |
| ZDHHC20      | -0.32091 | -4.7467 | 5.77E-06 | 0.00092052 |
| F8A1         | 0.2884   | 4.7445  | 5.83E-06 | 0.00092052 |
| OSTM1        | -0.32346 | -4.7371 | 6.01E-06 | 0.00093817 |
| PDCL         | -0.21479 | -4.7318 | 6.14E-06 | 0.00094783 |
| ADAMTS2      | 1.6564   | 4.7141  | 6.61E-06 | 0.00097538 |
| APPL1        | -0.27914 | -4.7203 | 6.44E-06 | 0.00097538 |
| ISYNA1       | 0.29883  | 4.7155  | 6.57E-06 | 0.00097538 |
| GMFB         | -0.34848 | -4.7154 | 6.58E-06 | 0.00097538 |
| HSPA13       | -0.38843 | -4.7047 | 6.87E-06 | 0.00098586 |
| PRR14        | 0.2464   | 4.6989  | 7.04E-06 | 0.00098586 |
| CCSER2       | -0.2549  | -4.6969 | 7.10E-06 | 0.00098586 |
| CCL4         | -0.50401 | -4.6921 | 7.24E-06 | 0.00098586 |
| FAM210A      | -0.25938 | -4.6906 | 7.28E-06 | 0.00098586 |
| NCKAP5L      | 0.26043  | 4.6885  | 7.35E-06 | 0.00098586 |
| PRRT3        | 0.26123  | 4.6869  | 7.40E-06 | 0.00098586 |
| DHX40        | -0.22749 | -4.6867 | 7.40E-06 | 0.00098586 |
| INSL3        | 0.58205  | 4.6845  | 7.47E-06 | 0.00098586 |
| RAP2A        | -0.40231 | -4.6843 | 7.48E-06 | 0.00098586 |
| GNG2         | -0.26659 | -4.6839 | 7.49E-06 | 0.00098586 |
| TNK2         | 0.29712  | 4.6585  | 8.31E-06 | 0.0010836  |
| NPIPA7       | 0.29529  | 4.645   | 8.79E-06 | 0.0011347  |
| TIPARP       | -0.26234 | -4.6354 | 9.14E-06 | 0.0011626  |
| RRAS2        | -0.35496 | -4.6331 | 9.23E-06 | 0.0011626  |
| C21orf91     | -0.33757 | -4.6321 | 9.27E-06 | 0.0011626  |
| SF3A2        | 0.34899  | 4.6254  | 9.52E-06 | 0.0011837  |
| NPIP4        | 0.537    | 4.6196  | 9.75E-06 | 0.001201   |
| SMAD7        | -0.33765 | -4.6121 | 1.01E-05 | 0.0012273  |
| CD226        | -0.3392  | -4.6092 | 1.02E-05 | 0.0012309  |
| RAB27B       | -0.42206 | -4.6069 | 1.03E-05 | 0.001231   |

Appendix 1 to Pan S, Zhou Y, Yan L, et al. TGF- $\beta$ 1 is associated with deficits in cognition and cerebral cortical thickness in first-episode schizophrenia. *J Psychiatry Neurosci* 2022. doi: 10.1503/jpn.210121  
 Copyright © 2022 The Author(s) or their employer(s).

To receive this resource in an accessible format, please contact us at [cmajgroup@cmaj.ca](mailto:cmajgroup@cmaj.ca).

Online appendices are unedited and posted as supplied by the authors.

|           |          |         |          |           |
|-----------|----------|---------|----------|-----------|
| XRCC3     | 0.30928  | 4.6041  | 1.04E-05 | 0.0012343 |
| FADS3     | 0.27009  | 4.5828  | 1.13E-05 | 0.0013346 |
| LOC283710 | 0.3451   | 4.574   | 1.17E-05 | 0.0013536 |
| NFKBID    | 0.26895  | 4.5721  | 1.18E-05 | 0.0013536 |
| STK17B    | -0.25637 | -4.5714 | 1.19E-05 | 0.0013536 |
| TTC33     | -0.36376 | -4.5688 | 1.20E-05 | 0.0013536 |
| DHRS12    | 0.38906  | 4.5687  | 1.20E-05 | 0.0013536 |
| PPP1CB    | -0.32611 | -4.5584 | 1.25E-05 | 0.0013998 |
| NORAD     | -0.23657 | -4.5538 | 1.27E-05 | 0.0014142 |
| REM2      | 0.44849  | 4.5482  | 1.30E-05 | 0.0014352 |
| TBC1D3H   | 0.38175  | 4.5409  | 1.34E-05 | 0.0014659 |
| MYCT1     | -0.68289 | -4.538  | 1.36E-05 | 0.0014676 |
| EXOC5     | -0.28199 | -4.5366 | 1.37E-05 | 0.0014676 |
| ZNF213    | 0.29248  | 4.5288  | 1.41E-05 | 0.0015029 |
| MMD       | -0.48452 | -4.5164 | 1.48E-05 | 0.0015397 |
| VAMP7     | -0.26865 | -4.5154 | 1.49E-05 | 0.0015397 |
| ARL5A     | -0.35308 | -4.5141 | 1.50E-05 | 0.0015397 |
| PDGFD     | -0.53547 | -4.5138 | 1.50E-05 | 0.0015397 |
| ZNF341    | 0.242    | 4.5117  | 1.51E-05 | 0.0015397 |
| TMEM38B   | -0.38833 | -4.5112 | 1.51E-05 | 0.0015397 |
| TSC22D1   | -0.35888 | -4.5078 | 1.53E-05 | 0.0015494 |
| LRFN1     | 0.37195  | 4.5055  | 1.55E-05 | 0.0015525 |
| RNF11     | -0.42296 | -4.5036 | 1.56E-05 | 0.0015525 |
| DENND1B   | -0.40908 | -4.5017 | 1.57E-05 | 0.0015529 |
| IPO7      | -0.23309 | -4.4972 | 1.60E-05 | 0.0015696 |
| RNF2      | -0.28472 | -4.4926 | 1.63E-05 | 0.0015872 |
| VIPR1     | 0.20774  | 4.4843  | 1.69E-05 | 0.0016292 |
| ISCA1     | -0.24471 | -4.4788 | 1.73E-05 | 0.0016542 |
| ZNF865    | 0.29984  | 4.4699  | 1.79E-05 | 0.0017016 |
| HOOK2     | 0.23262  | 4.4662  | 1.81E-05 | 0.0017153 |
| AKR1C3    | -0.75094 | -4.4632 | 1.84E-05 | 0.0017234 |
| PIK3R1    | -0.22838 | -4.4588 | 1.87E-05 | 0.0017372 |
| RAB11B    | 0.26351  | 4.4578  | 1.88E-05 | 0.0017372 |
| CACNA1F   | 0.3823   | 4.4525  | 1.92E-05 | 0.0017617 |
| STOM      | -0.2958  | -4.4464 | 1.96E-05 | 0.0017818 |
| LARGE2    | 0.41777  | 4.4453  | 1.97E-05 | 0.0017818 |
| SFN       | 0.75302  | 4.4446  | 1.98E-05 | 0.0017818 |
| KLHL7     | -0.21639 | -4.4397 | 2.02E-05 | 0.0017996 |
| NPIPA3    | 0.28093  | 4.4374  | 2.04E-05 | 0.0017996 |
| LYSMD3    | -0.4261  | -4.4371 | 2.04E-05 | 0.0017996 |
| GALNT1    | -0.28094 | -4.4351 | 2.05E-05 | 0.0018022 |

Appendix 1 to Pan S, Zhou Y, Yan L, et al. TGF- $\beta$ 1 is associated with deficits in cognition and cerebral cortical thickness in first-episode schizophrenia. *J Psychiatry Neurosci* 2022. doi: 10.1503/jpn.210121  
Copyright © 2022 The Author(s) or their employer(s).

To receive this resource in an accessible format, please contact us at [cmajgroup@cmaj.ca](mailto:cmajgroup@cmaj.ca).

Online appendices are unedited and posted as supplied by the authors.

|          |          |         |          |           |
|----------|----------|---------|----------|-----------|
| TBC1D3D  | 0.36919  | 4.431   | 2.09E-05 | 0.0018202 |
| P2RY10   | -0.28577 | -4.426  | 2.13E-05 | 0.0018445 |
| FAM229A  | 0.33462  | 4.4216  | 2.17E-05 | 0.0018651 |
| SH2D3C   | 0.27282  | 4.4183  | 2.20E-05 | 0.0018723 |
| MTHFD2   | -0.32976 | -4.4164 | 2.21E-05 | 0.0018723 |
| U2AF1L4  | 0.30539  | 4.4159  | 2.22E-05 | 0.0018723 |
| FBXL16   | 0.34548  | 4.412   | 2.25E-05 | 0.0018895 |
| SCARF2   | 0.38734  | 4.4104  | 2.27E-05 | 0.0018898 |
| NUS1     | -0.25837 | -4.4071 | 2.30E-05 | 0.0019024 |
| TMED7    | -0.27045 | -4.3969 | 2.39E-05 | 0.0019689 |
| CD244    | -0.28662 | -4.3936 | 2.42E-05 | 0.0019829 |
| NKAPD1   | -0.26129 | -4.3895 | 2.46E-05 | 0.0020031 |
| ZNF414   | 0.31049  | 4.3676  | 2.68E-05 | 0.0021714 |
| ZC3H12A  | 0.24447  | 4.3658  | 2.70E-05 | 0.0021733 |
| PLEKHA1  | -0.29621 | -4.3625 | 2.74E-05 | 0.0021888 |
| ASF1A    | -0.26597 | -4.3554 | 2.82E-05 | 0.0022373 |
| CDK8     | -0.21759 | -4.3457 | 2.93E-05 | 0.0022966 |
| TSN      | -0.17552 | -4.3451 | 2.93E-05 | 0.0022966 |
| ARHGEF12 | -0.43149 | -4.3443 | 2.94E-05 | 0.0022966 |
| SOWAHD   | 0.34739  | 4.3359  | 3.04E-05 | 0.0023605 |
| IER3IP1  | -0.31664 | -4.334  | 3.06E-05 | 0.0023631 |
| ZNF468   | -0.29082 | -4.3327 | 3.08E-05 | 0.0023631 |
| WNT6     | 0.49254  | 4.3275  | 3.14E-05 | 0.0023981 |
| LZTFL1   | -0.25804 | -4.3247 | 3.18E-05 | 0.0024108 |
| PYGM     | 0.30094  | 4.3222  | 3.21E-05 | 0.0024205 |
| GDPD1    | -0.36935 | -4.3178 | 3.26E-05 | 0.0024488 |
| PNRC2    | -0.21863 | -4.3148 | 3.30E-05 | 0.0024639 |
| TBC1D3G  | 0.37916  | 4.3132  | 3.32E-05 | 0.0024661 |
| CCDC106  | 0.32964  | 4.3115  | 3.35E-05 | 0.0024667 |
| B3GNT9   | 0.31026  | 4.3099  | 3.37E-05 | 0.0024667 |
| DCUN1D1  | -0.29907 | -4.3082 | 3.39E-05 | 0.0024667 |
| UBE2V2   | -0.2117  | -4.3075 | 3.40E-05 | 0.0024667 |
| PRSS23   | -0.55755 | -4.3053 | 3.43E-05 | 0.0024748 |
| MOB4     | -0.38837 | -4.3016 | 3.48E-05 | 0.0024904 |
| KLHL15   | -0.40055 | -4.2999 | 3.50E-05 | 0.0024904 |
| TAF13    | -0.41903 | -4.2996 | 3.51E-05 | 0.0024904 |
| CA5BP1   | 0.33068  | 4.295   | 3.57E-05 | 0.0025225 |
| SYT11    | -0.29043 | -4.2931 | 3.60E-05 | 0.002528  |
| RAB28    | -0.21544 | -4.2871 | 3.68E-05 | 0.0025597 |
| CCDC84   | 0.30112  | 4.2863  | 3.69E-05 | 0.0025597 |
| NPIP12   | 0.44676  | 4.2859  | 3.70E-05 | 0.0025597 |

Appendix 1 to Pan S, Zhou Y, Yan L, et al. TGF- $\beta$ 1 is associated with deficits in cognition and cerebral cortical thickness in first-episode schizophrenia. *J Psychiatry Neurosci* 2022. doi: 10.1503/jpn.210121  
 Copyright © 2022 The Author(s) or their employer(s).

To receive this resource in an accessible format, please contact us at [cmajgroup@cmaj.ca](mailto:cmajgroup@cmaj.ca).

Online appendices are unedited and posted as supplied by the authors.

|           |          |         |          |           |
|-----------|----------|---------|----------|-----------|
| VENTX     | 0.32869  | 4.2839  | 3.73E-05 | 0.0025659 |
| ATAT1     | 0.2805   | 4.2811  | 3.77E-05 | 0.0025815 |
| ATF1      | -0.2396  | -4.2737 | 3.88E-05 | 0.0026429 |
| PNPLA8    | -0.32914 | -4.2724 | 3.90E-05 | 0.0026435 |
| YWHAQ     | -0.21693 | -4.2658 | 4.00E-05 | 0.0026981 |
| PPM1A     | -0.32113 | -4.2615 | 4.07E-05 | 0.0027117 |
| MIER1     | -0.28708 | -4.2613 | 4.07E-05 | 0.0027117 |
| ARL4C     | -0.24304 | -4.2584 | 4.12E-05 | 0.0027117 |
| TRIM46    | 0.3275   | 4.2582  | 4.12E-05 | 0.0027117 |
| PPP1R13L  | 0.30754  | 4.2581  | 4.12E-05 | 0.0027117 |
| SMAD5     | -0.29497 | -4.2539 | 4.19E-05 | 0.0027375 |
| FXYP7     | 0.4791   | 4.2525  | 4.21E-05 | 0.0027375 |
| ANKRD46   | -0.28256 | -4.2519 | 4.22E-05 | 0.0027375 |
| SMIM14    | -0.20085 | -4.2507 | 4.24E-05 | 0.0027375 |
| SEMA4B    | 0.29425  | 4.2413  | 4.40E-05 | 0.0028177 |
| UBXN2A    | -0.21991 | -4.2408 | 4.41E-05 | 0.0028177 |
| RBBP9     | -0.24646 | -4.2341 | 4.52E-05 | 0.0028778 |
| KLRB1     | -0.62117 | -4.2318 | 4.56E-05 | 0.0028869 |
| SEC62     | -0.2918  | -4.2294 | 4.61E-05 | 0.0028869 |
| RBM27     | -0.29688 | -4.2291 | 4.61E-05 | 0.0028869 |
| PCNP      | -0.25172 | -4.2284 | 4.62E-05 | 0.0028869 |
| CRTC2     | 0.21016  | 4.227   | 4.65E-05 | 0.0028897 |
| ZYX       | 0.37014  | 4.214   | 4.89E-05 | 0.0030104 |
| DCLRE1A   | -0.33578 | -4.214  | 4.89E-05 | 0.0030104 |
| CBFA2T3   | 0.2874   | 4.2099  | 4.97E-05 | 0.0030441 |
| TBC1D3    | 0.33093  | 4.2     | 5.16E-05 | 0.0031475 |
| GNPTAB    | -0.28099 | -4.1989 | 5.18E-05 | 0.0031475 |
| LMTK3     | 0.30567  | 4.1971  | 5.22E-05 | 0.003154  |
| ZFP36     | 0.35669  | 4.1959  | 5.24E-05 | 0.0031546 |
| STK39     | -0.22932 | -4.1935 | 5.29E-05 | 0.0031694 |
| DR1       | -0.18198 | -4.1904 | 5.35E-05 | 0.0031943 |
| UPRT      | -0.21511 | -4.1884 | 5.39E-05 | 0.0032046 |
| KIAA0895L | 0.29817  | 4.1865  | 5.43E-05 | 0.0032128 |
| KLF11     | -0.30126 | -4.1846 | 5.47E-05 | 0.003223  |
| ATP6V0A1  | 0.26134  | 4.1825  | 5.52E-05 | 0.0032343 |
| PTPN11    | -0.2672  | -4.1809 | 5.55E-05 | 0.0032408 |
| UBQLNL    | 0.46033  | 4.1761  | 5.65E-05 | 0.003286  |
| MBTPS2    | -0.25618 | -4.1746 | 5.69E-05 | 0.0032904 |
| DENND4A   | -0.24628 | -4.1716 | 5.75E-05 | 0.0033112 |
| ENPP4     | -0.46379 | -4.1708 | 5.77E-05 | 0.0033112 |
| FAM107B   | -0.19492 | -4.1637 | 5.93E-05 | 0.0033875 |

Appendix 1 to Pan S, Zhou Y, Yan L, et al. TGF- $\beta$ 1 is associated with deficits in cognition and cerebral cortical thickness in first-episode schizophrenia. *J Psychiatry Neurosci* 2022. doi: 10.1503/jpn.210121  
Copyright © 2022 The Author(s) or their employer(s).

To receive this resource in an accessible format, please contact us at [cmajgroup@cmaj.ca](mailto:cmajgroup@cmaj.ca).

Online appendices are unedited and posted as supplied by the authors.

|           |          |         |          |           |
|-----------|----------|---------|----------|-----------|
| KRAS      | -0.23532 | -4.1626 | 5.95E-05 | 0.0033875 |
| PCBP1     | 0.48204  | 4.1607  | 6.00E-05 | 0.003397  |
| MTPN      | -0.25208 | -4.1595 | 6.03E-05 | 0.0033994 |
| ARRDC1    | 0.21085  | 4.1549  | 6.13E-05 | 0.0034335 |
| TAF1B     | -0.27146 | -4.1544 | 6.14E-05 | 0.0034335 |
| RLIM      | -0.21919 | -4.1536 | 6.16E-05 | 0.0034335 |
| LRIF1     | -0.23865 | -4.1509 | 6.23E-05 | 0.0034545 |
| WDCP      | -0.19628 | -4.1496 | 6.26E-05 | 0.0034575 |
| CHUK      | -0.26716 | -4.1438 | 6.40E-05 | 0.0035123 |
| DYRK2     | -0.22254 | -4.1433 | 6.41E-05 | 0.0035123 |
| TMEM9B    | -0.25681 | -4.1364 | 6.58E-05 | 0.0035795 |
| CTSK      | 0.29391  | 4.1362  | 6.59E-05 | 0.0035795 |
| ZNF260    | -0.29179 | -4.1231 | 6.92E-05 | 0.0037216 |
| MELTF-AS1 | 0.74845  | 4.1227  | 6.93E-05 | 0.0037216 |
| VAMP1     | 0.26866  | 4.1218  | 6.96E-05 | 0.0037216 |
| PI4K2B    | -0.36486 | -4.1217 | 6.96E-05 | 0.0037216 |
| FBXO8     | -0.21248 | -4.1191 | 7.03E-05 | 0.0037216 |
| YAF2      | -0.21358 | -4.1173 | 7.07E-05 | 0.0037216 |
| BLOC1S6   | -0.25157 | -4.1172 | 7.08E-05 | 0.0037216 |
| MAP3K7CL  | -0.56943 | -4.1171 | 7.08E-05 | 0.0037216 |
| RALA      | -0.18667 | -4.1166 | 7.10E-05 | 0.0037216 |
| GID4      | -0.24813 | -4.1149 | 7.14E-05 | 0.0037304 |
| APOBEC3B  | 0.5076   | 4.1118  | 7.22E-05 | 0.0037595 |
| RIOK3     | -0.24715 | -4.1097 | 7.28E-05 | 0.0037636 |
| PTCD1     | 0.24231  | 4.1095  | 7.29E-05 | 0.0037636 |
| ZNF444    | 0.22552  | 4.1074  | 7.35E-05 | 0.0037789 |
| AASDHPPT  | -0.21747 | -4.1043 | 7.43E-05 | 0.0038089 |
| ZNF579    | 0.30562  | 4.1025  | 7.48E-05 | 0.0038209 |
| NPIPA2    | 0.2648   | 4.0992  | 7.58E-05 | 0.0038476 |
| RAB8B     | -0.28731 | -4.0985 | 7.60E-05 | 0.0038476 |
| LRCH4     | 0.23703  | 4.0973  | 7.63E-05 | 0.0038476 |
| LIMS1     | -0.24405 | -4.0967 | 7.65E-05 | 0.0038476 |
| PAQR3     | -0.35783 | -4.0948 | 7.71E-05 | 0.0038586 |
| NUDT21    | -0.19182 | -4.0939 | 7.73E-05 | 0.0038586 |
| VTA1      | -0.20963 | -4.0912 | 7.81E-05 | 0.0038842 |
| ALDOA     | 0.41663  | 4.0895  | 7.86E-05 | 0.0038949 |
| KLF2      | 0.28471  | 4.0883  | 7.90E-05 | 0.0038979 |
| WDR36     | -0.24861 | -4.0869 | 7.94E-05 | 0.0039042 |
| FEM1B     | -0.20914 | -4.0844 | 8.01E-05 | 0.0039268 |
| CMKLR1    | -0.41071 | -4.0809 | 8.12E-05 | 0.0039655 |
| NPIPB15   | 0.50167  | 4.076   | 8.27E-05 | 0.0040132 |



Appendix 1 to Pan S, Zhou Y, Yan L, et al. TGF- $\beta$ 1 is associated with deficits in cognition and cerebral cortical thickness in first-episode schizophrenia. *J Psychiatry Neurosci* 2022. doi: 10.1503/jpn.210121  
 Copyright © 2022 The Author(s) or their employer(s).

To receive this resource in an accessible format, please contact us at [cmajgroup@cmaj.ca](mailto:cmajgroup@cmaj.ca).

Online appendices are unedited and posted as supplied by the authors.

|          |          |         |            |           |
|----------|----------|---------|------------|-----------|
| ZNF148   | -0.27302 | -4.0752 | 8.30E-05   | 0.0040132 |
| PNPLA2   | 0.28023  | 4.0739  | 8.34E-05   | 0.0040132 |
| CD164    | -0.24825 | -4.0735 | 8.35E-05   | 0.0040132 |
| TBC1D3I  | 0.36523  | 4.0729  | 8.37E-05   | 0.0040132 |
| HOPX     | -0.50415 | -4.0714 | 8.42E-05   | 0.0040216 |
| YDJC     | 0.24483  | 4.0621  | 8.72E-05   | 0.0041505 |
| GTF2A1   | -0.24978 | -4.0585 | 8.84E-05   | 0.0041907 |
| LTC4S    | 0.33118  | 4.0577  | 8.86E-05   | 0.0041907 |
| BMI1     | -0.27088 | -4.0559 | 8.93E-05   | 0.0041936 |
| FBRS     | 0.21926  | 4.0556  | 8.93E-05   | 0.0041936 |
| ANP32E   | -0.23685 | -4.0546 | 8.97E-05   | 0.0041944 |
| SGMS2    | -0.41264 | -4.0491 | 9.15E-05   | 0.0042678 |
| LENG8    | 0.26497  | 4.0471  | 9.22E-05   | 0.0042778 |
| CNOT7    | -0.20187 | -4.0466 | 9.24E-05   | 0.0042778 |
| PPP1R35  | 0.34614  | 4.043   | 9.37E-05   | 0.0043211 |
| ZNF14    | -0.25388 | -4.0367 | 9.59E-05   | 0.0044098 |
| HMGN4    | -0.21958 | -4.034  | 9.69E-05   | 0.0044391 |
| SLC39A4  | 0.29024  | 4.0305  | 9.82E-05   | 0.0044704 |
| LIN52    | -0.26002 | -4.03   | 9.84E-05   | 0.0044704 |
| UTF1     | 0.55118  | 4.0278  | 9.92E-05   | 0.0044704 |
| CCNC     | -0.26148 | -4.0276 | 9.92E-05   | 0.0044704 |
| SH3BP1   | 0.31497  | 4.024   | 0.00010058 | 0.0045161 |
| ZMIZ2    | 0.21744  | 4.0212  | 0.00010162 | 0.0045478 |
| CREM     | -0.25753 | -4.0104 | 0.0001058  | 0.0047193 |
| RAPGEFL1 | 0.31434  | 4.0041  | 0.00010832 | 0.0048156 |
| RGMA     | 0.74678  | 4.003   | 0.00010877 | 0.0048196 |
| DUSP2    | -0.50959 | -3.9983 | 0.00011069 | 0.0048697 |
| POT1     | -0.23634 | -3.9983 | 0.00011071 | 0.0048697 |
| INF2     | 0.29646  | 3.9976  | 0.00011099 | 0.0048697 |
| NR1D2    | -0.29579 | -3.9947 | 0.0001122  | 0.0049066 |
| CRYBG2   | 0.34315  | 3.9919  | 0.00011336 | 0.0049415 |
| CENPL    | -0.29953 | -3.9902 | 0.00011407 | 0.0049565 |
| ACTA1    | 0.71485  | 3.9872  | 0.00011537 | 0.004981  |
| POLR2M   | -0.29624 | -3.9872 | 0.00011538 | 0.004981  |
| CCDC126  | -0.37468 | -3.9862 | 0.0001158  | 0.0049817 |
| GNA13    | -0.29437 | -3.9846 | 0.0001165  | 0.0049817 |
| MGRN1    | 0.28623  | 3.9846  | 0.00011651 | 0.0049817 |
| GPR173   | 0.70822  | 3.9831  | 0.00011714 | 0.0049817 |
| PTOV1    | 0.21474  | 3.9825  | 0.00011742 | 0.0049817 |
| C7orf61  | 0.59624  | 3.982   | 0.00011762 | 0.0049817 |
| MED21    | -0.27701 | -3.9808 | 0.00011813 | 0.0049875 |

Appendix 1 to Pan S, Zhou Y, Yan L, et al. TGF- $\beta$ 1 is associated with deficits in cognition and cerebral cortical thickness in first-episode schizophrenia. *J Psychiatry Neurosci* 2022. doi: 10.1503/jpn.210121  
 Copyright © 2022 The Author(s) or their employer(s).

To receive this resource in an accessible format, please contact us at [cmajgroup@cmaj.ca](mailto:cmajgroup@cmaj.ca).

Online appendices are unedited and posted as supplied by the authors.

|         |          |         |            |           |
|---------|----------|---------|------------|-----------|
| PPP4R3B | -0.20183 | -3.9743 | 0.00012101 | 0.0050932 |
| TNPO1   | -0.23096 | -3.971  | 0.00012252 | 0.0051295 |
| TSEN15  | -0.19348 | -3.9703 | 0.00012284 | 0.0051295 |
| LSR     | 0.30411  | 3.9699  | 0.00012302 | 0.0051295 |
| TBC1D3C | 0.33068  | 3.9683  | 0.00012377 | 0.0051342 |
| RCAN1   | -0.19716 | -3.968  | 0.0001239  | 0.0051342 |
| LLCFC1  | 0.59387  | 3.9636  | 0.00012593 | 0.0051939 |
| RABL3   | -0.21592 | -3.9622 | 0.00012659 | 0.0051939 |
| CCNT1   | -0.18477 | -3.962  | 0.00012666 | 0.0051939 |
| BMT2    | -0.29435 | -3.9609 | 0.0001272  | 0.0051939 |
| CCDC120 | 0.21188  | 3.9607  | 0.00012727 | 0.0051939 |
| NCOA4   | -0.3229  | -3.9539 | 0.00013053 | 0.0053098 |
| CCDC43  | -0.19637 | -3.9522 | 0.00013137 | 0.0053098 |
| GZMA    | -0.60094 | -3.9521 | 0.0001314  | 0.0053098 |
| ERFL    | 0.41679  | 3.9515  | 0.0001317  | 0.0053098 |
| ZNF837  | 0.30083  | 3.9496  | 0.00013262 | 0.0053311 |
| KBTBD6  | -0.27249 | -3.9445 | 0.00013514 | 0.0054162 |
| NPIP13  | 0.44627  | 3.9436  | 0.0001356  | 0.0054182 |
| UHRF1   | 0.26053  | 3.9401  | 0.00013738 | 0.0054618 |
| HGD     | -0.51988 | -3.9391 | 0.00013785 | 0.0054618 |
| CNIH1   | -0.26819 | -3.9388 | 0.00013804 | 0.0054618 |
| ENC1    | -0.32935 | -3.9382 | 0.00013831 | 0.0054618 |
| GPR65   | -0.21994 | -3.9369 | 0.00013896 | 0.0054713 |
| PRR5L   | -0.31452 | -3.9356 | 0.00013966 | 0.0054826 |
| SPATC1  | 0.56959  | 3.9341  | 0.00014044 | 0.0054973 |
| MGAT4A  | -0.25014 | -3.9329 | 0.00014105 | 0.0055049 |
| RCHY1   | -0.2336  | -3.9309 | 0.00014207 | 0.0055223 |
| CDK18   | 0.30171  | 3.9305  | 0.00014232 | 0.0055223 |
| SSPO    | 0.34765  | 3.9277  | 0.00014379 | 0.0055617 |
| TMEM143 | 0.24662  | 3.9263  | 0.0001445  | 0.0055617 |
| COG7    | 0.20292  | 3.9262  | 0.00014457 | 0.0055617 |
| GZMB    | -0.54601 | -3.9246 | 0.00014541 | 0.0055778 |
| DBF4B   | 0.2327   | 3.9225  | 0.00014654 | 0.0056053 |
| NDFIP2  | -0.41431 | -3.9212 | 0.00014723 | 0.0056155 |
| KLRD1   | -0.45096 | -3.9201 | 0.00014783 | 0.005617  |
| CD37    | 0.21934  | 3.9196  | 0.0001481  | 0.005617  |
| NMD3    | -0.30866 | -3.9166 | 0.00014974 | 0.0056633 |
| USP1    | -0.25006 | -3.9153 | 0.00015047 | 0.0056746 |
| GTPBP8  | -0.21469 | -3.9118 | 0.00015244 | 0.0057328 |
| ZNF772  | -0.38842 | -3.9094 | 0.00015379 | 0.0057675 |
| ARRDC3  | -0.34377 | -3.9085 | 0.00015426 | 0.0057692 |

Appendix 1 to Pan S, Zhou Y, Yan L, et al. TGF- $\beta$ 1 is associated with deficits in cognition and cerebral cortical thickness in first-episode schizophrenia. *J Psychiatry Neurosci* 2022. doi: 10.1503/jpn.210121  
 Copyright © 2022 The Author(s) or their employer(s).

To receive this resource in an accessible format, please contact us at [cmajgroup@cmaj.ca](mailto:cmajgroup@cmaj.ca).

Online appendices are unedited and posted as supplied by the authors.

|           |          |         |            |           |
|-----------|----------|---------|------------|-----------|
| TBC1D2    | 0.24947  | 3.907   | 0.00015513 | 0.0057745 |
| HPGD      | -0.34422 | -3.9068 | 0.00015527 | 0.0057745 |
| ST8SIA6   | -0.42878 | -3.9011 | 0.00015851 | 0.0058631 |
| USP12     | -0.23639 | -3.9011 | 0.00015852 | 0.0058631 |
| WDR12     | -0.19395 | -3.8947 | 0.00016227 | 0.0059852 |
| GUCY1A1   | -0.44676 | -3.8928 | 0.00016339 | 0.0060073 |
| AKAP7     | -0.32107 | -3.8917 | 0.00016405 | 0.0060073 |
| DLG4      | 0.22052  | 3.8915  | 0.00016421 | 0.0060073 |
| CCNG1     | -0.2263  | -3.8905 | 0.00016481 | 0.0060128 |
| ATG5      | -0.22841 | -3.8897 | 0.00016526 | 0.0060129 |
| PLK1      | 0.37406  | 3.8886  | 0.00016597 | 0.0060225 |
| PRICKLE3  | 0.22698  | 3.8863  | 0.00016734 | 0.0060558 |
| FAM98B    | -0.20671 | -3.8815 | 0.00017028 | 0.0061455 |
| SP4       | -0.30754 | -3.8783 | 0.00017228 | 0.0062012 |
| CNTNAP1   | 0.33166  | 3.8771  | 0.00017308 | 0.0062133 |
| SPIN1     | -0.22703 | -3.8758 | 0.00017391 | 0.006222  |
| TMEM88    | 0.49352  | 3.8745  | 0.00017471 | 0.006222  |
| ATAD1     | -0.23154 | -3.8742 | 0.00017492 | 0.006222  |
| SLC30A6   | -0.17771 | -3.8738 | 0.00017518 | 0.006222  |
| ENKUR     | -0.60382 | -3.8707 | 0.00017717 | 0.0062762 |
| ZMPSTE24  | -0.22899 | -3.8661 | 0.00018013 | 0.0063642 |
| PRRT2     | 0.37552  | 3.8619  | 0.0001829  | 0.0064452 |
| ABCA7     | 0.23863  | 3.8609  | 0.00018356 | 0.0064516 |
| PTPN23    | 0.23099  | 3.8585  | 0.00018522 | 0.0064928 |
| SELENOT   | -0.34984 | -3.8561 | 0.00018685 | 0.0065254 |
| KCNIP2    | 0.38581  | 3.8547  | 0.00018776 | 0.0065254 |
| C9orf139  | 0.30959  | 3.8543  | 0.00018802 | 0.0065254 |
| VWA7      | 0.36447  | 3.8542  | 0.00018814 | 0.0065254 |
| KIAA1143  | -0.21629 | -3.8532 | 0.00018876 | 0.0065254 |
| DCK       | -0.22688 | -3.8528 | 0.00018907 | 0.0065254 |
| DPY19L1   | -0.25666 | -3.8512 | 0.00019015 | 0.0065461 |
| MRAS      | -0.39402 | -3.8492 | 0.00019158 | 0.0065783 |
| PDIK1L    | -0.28596 | -3.8474 | 0.00019282 | 0.0065883 |
| KBTBD8    | -0.36964 | -3.8473 | 0.00019285 | 0.0065883 |
| CISD2     | -0.3242  | -3.8451 | 0.00019445 | 0.0066099 |
| SDC2      | -0.58836 | -3.845  | 0.00019447 | 0.0066099 |
| LOC728392 | 0.33877  | 3.8393  | 0.00019855 | 0.0067253 |
| HAVCR2    | -0.25418 | -3.8383 | 0.00019926 | 0.0067253 |
| KCNH3     | 0.32668  | 3.8382  | 0.00019937 | 0.0067253 |
| SKIL      | -0.35585 | -3.8373 | 0.00020003 | 0.0067259 |
| FBXL17    | -0.26359 | -3.8368 | 0.00020039 | 0.0067259 |

Appendix 1 to Pan S, Zhou Y, Yan L, et al. TGF- $\beta$ 1 is associated with deficits in cognition and cerebral cortical thickness in first-episode schizophrenia. *J Psychiatry Neurosci* 2022. doi: 10.1503/jpn.210121  
 Copyright © 2022 The Author(s) or their employer(s).

To receive this resource in an accessible format, please contact us at [cmajgroup@cmaj.ca](mailto:cmajgroup@cmaj.ca).

Online appendices are unedited and posted as supplied by the authors.

|              |          |         |            |           |
|--------------|----------|---------|------------|-----------|
| CNOT3        | 0.23712  | 3.8292  | 0.00020595 | 0.0068955 |
| KLRF1        | -0.55367 | -3.8265 | 0.00020796 | 0.0069349 |
| OPTN         | -0.36526 | -3.8263 | 0.00020816 | 0.0069349 |
| BICRA        | 0.34596  | 3.8223  | 0.00021113 | 0.0070055 |
| UAP1         | -0.21684 | -3.8221 | 0.00021132 | 0.0070055 |
| LOC102724957 | 1.0092   | 3.8206  | 0.00021246 | 0.0070257 |
| B4GALT6      | -0.48416 | -3.8193 | 0.00021345 | 0.0070411 |
| ZNF24        | -0.21242 | -3.8174 | 0.00021496 | 0.0070737 |
| DLGAP3       | 0.30987  | 3.8156  | 0.00021629 | 0.0071    |
| ZNF845       | -0.27968 | -3.8085 | 0.00022191 | 0.0072667 |
| AZIN1        | -0.24433 | -3.8056 | 0.00022427 | 0.0073262 |
| STAG3        | 0.27582  | 3.802   | 0.00022719 | 0.0073989 |
| LMAN1        | -0.22487 | -3.8015 | 0.0002276  | 0.0073989 |
| TRIM59       | -0.24136 | -3.7963 | 0.00023192 | 0.0075211 |
| FAM71D       | 0.78733  | 3.7925  | 0.00023512 | 0.0076065 |
| SMIM23       | 0.66966  | 3.7906  | 0.00023667 | 0.0076383 |
| MBD6         | 0.32435  | 3.7879  | 0.00023897 | 0.0076941 |
| PRNP         | -0.19056 | -3.7866 | 0.00024013 | 0.0077032 |
| C1orf21      | -0.43499 | -3.7863 | 0.0002404  | 0.0077032 |
| PI3          | 0.58823  | 3.7758  | 0.00024964 | 0.00798   |
| FAM172A      | -0.22269 | -3.7743 | 0.00025093 | 0.0079948 |
| MYNN         | -0.31715 | -3.7738 | 0.00025143 | 0.0079948 |
| MUC1         | 0.41844  | 3.7731  | 0.00025201 | 0.0079948 |
| WAPL         | -0.21372 | -3.7726 | 0.00025251 | 0.0079948 |
| PBX4         | 0.26315  | 3.7709  | 0.00025407 | 0.0079948 |
| ABHD13       | -0.28709 | -3.7703 | 0.00025457 | 0.0079948 |
| FBXL3        | -0.26616 | -3.7699 | 0.00025496 | 0.0079948 |
| C2orf69      | -0.28589 | -3.7695 | 0.00025534 | 0.0079948 |
| CPSF1        | 0.25332  | 3.7692  | 0.00025556 | 0.0079948 |
| PDLIM2       | 0.19522  | 3.7687  | 0.00025605 | 0.0079948 |
| CDC40        | -0.18104 | -3.7653 | 0.00025922 | 0.0080592 |
| HRH4         | -0.56641 | -3.7652 | 0.00025931 | 0.0080592 |
| PDE5A        | -0.37033 | -3.7641 | 0.00026027 | 0.0080703 |
| STRN4        | 0.20375  | 3.7608  | 0.00026339 | 0.0081482 |
| TAPBP        | 0.24373  | 3.7579  | 0.00026612 | 0.0082015 |
| CD69         | -0.50142 | -3.7577 | 0.00026634 | 0.0082015 |
| GRAMD1A      | 0.23519  | 3.7556  | 0.00026831 | 0.0082433 |
| RGS14        | 0.20987  | 3.7538  | 0.00027001 | 0.0082719 |
| HDAC10       | 0.36117  | 3.7528  | 0.00027097 | 0.0082719 |
| CCDC61       | 0.19291  | 3.7527  | 0.00027109 | 0.0082719 |
| ZNF35        | -0.2685  | -3.7511 | 0.00027264 | 0.0083003 |

Appendix 1 to Pan S, Zhou Y, Yan L, et al. TGF- $\beta$ 1 is associated with deficits in cognition and cerebral cortical thickness in first-episode schizophrenia. *J Psychiatry Neurosci* 2022. doi: 10.1503/jpn.210121  
 Copyright © 2022 The Author(s) or their employer(s).

To receive this resource in an accessible format, please contact us at [cmajgroup@cmaj.ca](mailto:cmajgroup@cmaj.ca).

Online appendices are unedited and posted as supplied by the authors.

|          |          |         |            |           |
|----------|----------|---------|------------|-----------|
| ADGRG5   | -0.33193 | -3.7471 | 0.00027656 | 0.0083868 |
| CRIP2    | 0.34908  | 3.7457  | 0.00027792 | 0.0083868 |
| PDLIM5   | -0.19313 | -3.7457 | 0.00027795 | 0.0083868 |
| ZZZ3     | -0.25486 | -3.7457 | 0.00027798 | 0.0083868 |
| PHF12    | 0.22156  | 3.7405  | 0.00028319 | 0.0085249 |
| FSCN1    | 0.31844  | 3.7391  | 0.0002846  | 0.0085482 |
| DCUN1D5  | -0.25771 | -3.7378 | 0.00028593 | 0.008553  |
| SYNGAP1  | 0.26959  | 3.7377  | 0.00028604 | 0.008553  |
| FAM199X  | -0.24824 | -3.736  | 0.00028775 | 0.008585  |
| DDX50    | -0.23583 | -3.7324 | 0.00029143 | 0.00867   |
| ATN1     | 0.2799   | 3.7316  | 0.00029231 | 0.00867   |
| GLO1     | -0.22912 | -3.7308 | 0.00029312 | 0.00867   |
| TBC1D3F  | 0.35955  | 3.7303  | 0.00029366 | 0.00867   |
| COPS2    | -0.38152 | -3.7301 | 0.00029382 | 0.00867   |
| PEAK3    | 0.40189  | 3.7277  | 0.00029632 | 0.0087246 |
| TPMT     | -0.24437 | -3.727  | 0.00029708 | 0.0087276 |
| EPHB6    | 0.18716  | 3.7229  | 0.00030142 | 0.0088196 |
| SMTN     | 0.23289  | 3.7228  | 0.00030152 | 0.0088196 |
| PRAM1    | 0.31633  | 3.722   | 0.00030244 | 0.0088274 |
| NANP     | -0.25993 | -3.7182 | 0.00030653 | 0.0089081 |
| PNN      | 0.33037  | 3.7182  | 0.00030653 | 0.0089081 |
| PRRC1    | -0.21811 | -3.717  | 0.0003078  | 0.0089254 |
| ARHGAP18 | -0.25311 | -3.7158 | 0.00030917 | 0.008946  |
| TBC1D3K  | 0.31829  | 3.714   | 0.00031112 | 0.0089831 |
| HACD3    | -0.1696  | -3.7126 | 0.00031264 | 0.0090074 |
| CACNA1H  | 0.35054  | 3.7118  | 0.00031357 | 0.0090149 |
| RAP1A    | -0.21078 | -3.7099 | 0.00031562 | 0.0090546 |
| LENG9    | 0.24975  | 3.7084  | 0.00031738 | 0.0090857 |
| ZNF575   | 0.27756  | 3.7072  | 0.00031865 | 0.0091026 |
| PPP2R2B  | -0.40237 | -3.7062 | 0.00031987 | 0.0091175 |
| ESCO1    | -0.23749 | -3.7056 | 0.00032053 | 0.0091175 |
| EIF5A2   | -0.33611 | -3.7043 | 0.00032202 | 0.0091293 |
| AREG     | -0.93134 | -3.704  | 0.00032231 | 0.0091293 |
| NR3C1    | -0.25463 | -3.7034 | 0.00032299 | 0.0091293 |
| TNFSF12  | 0.21213  | 3.7019  | 0.00032466 | 0.009143  |
| LYPLA1   | -0.26571 | -3.7015 | 0.00032514 | 0.009143  |
| MYC      | 0.22879  | 3.7007  | 0.00032605 | 0.009143  |
| SDE2     | -0.25937 | -3.7006 | 0.0003262  | 0.009143  |
| SENP1    | -0.17641 | -3.7    | 0.00032694 | 0.0091449 |
| NCALD    | -0.30505 | -3.6986 | 0.00032847 | 0.0091686 |
| ARL5B    | -0.26796 | -3.6979 | 0.00032928 | 0.009172  |

Appendix 1 to Pan S, Zhou Y, Yan L, et al. TGF- $\beta$ 1 is associated with deficits in cognition and cerebral cortical thickness in first-episode schizophrenia. *J Psychiatry Neurosci* 2022. doi: 10.1503/jpn.210121  
 Copyright © 2022 The Author(s) or their employer(s).

To receive this resource in an accessible format, please contact us at [cmajgroup@cmaj.ca](mailto:cmajgroup@cmaj.ca).

Online appendices are unedited and posted as supplied by the authors.

|          |          |         |            |           |
|----------|----------|---------|------------|-----------|
| TBC1D3E  | 0.32885  | 3.6952  | 0.00033252 | 0.009243  |
| ZNF708   | -0.33563 | -3.6931 | 0.00033494 | 0.0092811 |
| ETNK1    | -0.32178 | -3.6928 | 0.00033527 | 0.0092811 |
| SDHD     | -0.25546 | -3.6899 | 0.00033876 | 0.0093313 |
| DTWD2    | -0.27447 | -3.6896 | 0.00033909 | 0.0093313 |
| C12orf29 | -0.34888 | -3.6896 | 0.00033917 | 0.0093313 |
| ZNF316   | 0.22177  | 3.6876  | 0.00034155 | 0.0093777 |
| NR4A3    | -0.73097 | -3.684  | 0.00034583 | 0.00946   |
| CTDSPL2  | -0.21134 | -3.6839 | 0.00034599 | 0.00946   |
| NKG7     | -0.52059 | -3.6834 | 0.00034667 | 0.00946   |
| MDFIC    | -0.28353 | -3.6823 | 0.0003479  | 0.0094746 |
| MAN1A2   | -0.18737 | -3.6813 | 0.0003492  | 0.0094907 |
| ZNF678   | -0.28102 | -3.6794 | 0.00035151 | 0.0095294 |
| TBPL1    | -0.2044  | -3.679  | 0.00035205 | 0.0095294 |
| NPIPB5   | 0.46471  | 3.677   | 0.00035453 | 0.0095649 |
| KIAA1614 | 0.37389  | 3.6766  | 0.00035498 | 0.0095649 |
| P2RY1    | -0.59094 | -3.6754 | 0.00035647 | 0.0095649 |
| RSRC1    | -0.22156 | -3.6748 | 0.00035731 | 0.0095649 |
| CYGB     | 0.69041  | 3.6747  | 0.00035745 | 0.0095649 |
| SSX2IP   | -0.29453 | -3.6745 | 0.00035763 | 0.0095649 |
| ENPP5    | -0.38775 | -3.6712 | 0.00036186 | 0.0096587 |
| RGS18    | -0.46838 | -3.6692 | 0.00036432 | 0.00969   |
| MEX3C    | -0.27095 | -3.6691 | 0.00036448 | 0.00969   |
| SCRN1    | -0.21077 | -3.666  | 0.00036856 | 0.0097745 |
| RBCK1    | 0.23259  | 3.6655  | 0.00036911 | 0.0097745 |
| GFM2     | -0.18672 | -3.6645 | 0.0003704  | 0.0097808 |
| MAT2B    | -0.18384 | -3.6642 | 0.0003708  | 0.0097808 |
| TC2N     | -0.30788 | -3.6623 | 0.00037334 | 0.0098285 |
| ABCC4    | -0.26551 | -3.6612 | 0.00037477 | 0.0098388 |
| GNG5     | 0.37728  | 3.6609  | 0.0003752  | 0.0098388 |
| GNAI3    | -0.18248 | -3.6601 | 0.00037615 | 0.0098445 |
| ZNF426   | -0.20415 | -3.657  | 0.0003803  | 0.0099217 |
| NDFIP1   | -0.17909 | -3.6568 | 0.00038058 | 0.0099217 |
| ZNF322   | -0.24988 | -3.6559 | 0.00038174 | 0.0099326 |
| RNF214   | 0.18593  | 3.6539  | 0.00038442 | 0.0099656 |
| SPATA7   | -0.293   | -3.6539 | 0.00038449 | 0.0099656 |
| SLC25A34 | 0.29799  | 3.6519  | 0.00038715 | 0.010015  |
| RIOK2    | -0.20484 | -3.6513 | 0.00038798 | 0.010017  |
| SLC30A1  | -0.26434 | -3.6445 | 0.00039737 | 0.01024   |
| IDUA     | 0.21425  | 3.6426  | 0.00040004 | 0.010289  |
| LYPD2    | -0.79906 | -3.6418 | 0.00040107 | 0.010296  |

Appendix 1 to Pan S, Zhou Y, Yan L, et al. TGF- $\beta$ 1 is associated with deficits in cognition and cerebral cortical thickness in first-episode schizophrenia. *J Psychiatry Neurosci* 2022. doi: 10.1503/jpn.210121  
 Copyright © 2022 The Author(s) or their employer(s).

To receive this resource in an accessible format, please contact us at [cmajgroup@cmaj.ca](mailto:cmajgroup@cmaj.ca).

Online appendices are unedited and posted as supplied by the authors.

|          |          |         |            |          |
|----------|----------|---------|------------|----------|
| CIC      | 0.23856  | 3.6408  | 0.00040254 | 0.010314 |
| TMED5    | -0.22033 | -3.6402 | 0.00040341 | 0.010317 |
| FAM71F2  | 0.39254  | 3.6346  | 0.00041134 | 0.010484 |
| P2RY12   | -0.55066 | -3.6342 | 0.00041196 | 0.010484 |
| SHOC2    | -0.25001 | -3.6339 | 0.00041231 | 0.010484 |
| YPEL1    | -0.28555 | -3.6296 | 0.00041851 | 0.010622 |
| SSC5D    | 0.57802  | 3.6278  | 0.00042125 | 0.010671 |
| SLC5A3   | -0.31429 | -3.6268 | 0.0004227  | 0.010688 |
| FGFBP2   | -0.54185 | -3.6228 | 0.00042855 | 0.010815 |
| F2R      | -0.41547 | -3.6219 | 0.00042996 | 0.010831 |
| ZNF296   | 0.29504  | 3.6198  | 0.00043302 | 0.010887 |
| DSTN     | -0.17415 | -3.619  | 0.00043427 | 0.010898 |
| NAA50    | -0.18942 | -3.618  | 0.00043583 | 0.010917 |
| NRROS    | 0.2011   | 3.6158  | 0.00043914 | 0.010964 |
| CD2AP    | -0.33122 | -3.6157 | 0.00043935 | 0.010964 |
| ZFP30    | -0.34118 | -3.615  | 0.00044031 | 0.010968 |
| GCLM     | -0.20136 | -3.6099 | 0.00044827 | 0.011104 |
| PIANP    | 0.39744  | 3.6098  | 0.00044841 | 0.011104 |
| TWSG1    | -0.30405 | -3.6097 | 0.00044852 | 0.011104 |
| CLCN3    | -0.19813 | -3.6089 | 0.0004499  | 0.011104 |
| RO60     | -0.23841 | -3.6062 | 0.00045401 | 0.011132 |
| FAT4     | -0.86351 | -3.606  | 0.00045438 | 0.011132 |
| ICE2     | -0.19813 | -3.606  | 0.0004544  | 0.011132 |
| ZSWIM1   | 0.19222  | 3.6055  | 0.00045517 | 0.011132 |
| CCDC6    | -0.15306 | -3.6055 | 0.0004552  | 0.011132 |
| ANO8     | 0.279    | 3.604   | 0.00045746 | 0.011167 |
| SLC1A2   | -0.68563 | -3.6007 | 0.00046288 | 0.011279 |
| RBM3     | -0.26008 | -3.5987 | 0.00046606 | 0.011324 |
| ALPK3    | 0.44703  | 3.5984  | 0.00046643 | 0.011324 |
| EPHX1    | 0.17795  | 3.5971  | 0.00046861 | 0.011357 |
| SMIM13   | -0.21096 | -3.5958 | 0.00047071 | 0.011387 |
| CAMTA2   | 0.18723  | 3.5943  | 0.00047312 | 0.011425 |
| ARHGAP45 | 0.18159  | 3.5936  | 0.00047438 | 0.011428 |
| NUDT15   | -0.26468 | -3.5932 | 0.00047495 | 0.011428 |
| FGFBP3   | 0.31598  | 3.5894  | 0.00048134 | 0.011543 |
| FAM209B  | 0.34072  | 3.5893  | 0.00048146 | 0.011543 |
| C8orf82  | 0.21765  | 3.5888  | 0.00048235 | 0.011544 |
| SLC30A4  | -0.266   | -3.5854 | 0.00048791 | 0.011637 |
| RBPJ     | -0.26023 | -3.5853 | 0.00048817 | 0.011637 |
| HCFC2    | -0.22485 | -3.5849 | 0.00048886 | 0.011637 |
| SLBP     | -0.16143 | -3.5827 | 0.00049264 | 0.011707 |

Appendix 1 to Pan S, Zhou Y, Yan L, et al. TGF- $\beta$ 1 is associated with deficits in cognition and cerebral cortical thickness in first-episode schizophrenia. *J Psychiatry Neurosci* 2022. doi: 10.1503/jpn.210121  
 Copyright © 2022 The Author(s) or their employer(s).

To receive this resource in an accessible format, please contact us at [cmajgroup@cmaj.ca](mailto:cmajgroup@cmaj.ca).

Online appendices are unedited and posted as supplied by the authors.

|           |          |         |            |          |
|-----------|----------|---------|------------|----------|
| POU6F1    | 0.27255  | 3.5756  | 0.00050485 | 0.011975 |
| PYHIN1    | -0.29838 | -3.5738 | 0.00050798 | 0.012017 |
| MBNL2     | -0.32235 | -3.5735 | 0.00050841 | 0.012017 |
| PLEC      | 0.23482  | 3.5715  | 0.00051207 | 0.012083 |
| ZBTB10    | -0.29246 | -3.5706 | 0.00051359 | 0.012097 |
| SEH1L     | -0.16366 | -3.57   | 0.0005146  | 0.0121   |
| RRS1      | 0.26231  | 3.5686  | 0.00051721 | 0.012122 |
| DENND6A   | -0.17551 | -3.5685 | 0.00051735 | 0.012122 |
| SLC10A7   | -0.18732 | -3.5674 | 0.00051922 | 0.012145 |
| CALM2     | -0.27979 | -3.5669 | 0.00052022 | 0.012147 |
| IL5RA     | -0.50113 | -3.5663 | 0.00052117 | 0.012148 |
| RCN3      | 0.39867  | 3.5655  | 0.00052268 | 0.012162 |
| CPNE3     | -0.18419 | -3.5647 | 0.0005242  | 0.012176 |
| C10orf105 | 0.31873  | 3.5605  | 0.00053173 | 0.012313 |
| ZNF615    | -0.22331 | -3.5604 | 0.00053192 | 0.012313 |
| GPAM      | -0.32481 | -3.5592 | 0.00053419 | 0.012344 |
| HAUS2     | -0.17716 | -3.5582 | 0.00053605 | 0.012366 |
| SELENOF   | -0.2362  | -3.5577 | 0.00053696 | 0.012366 |
| DNM1      | 0.31605  | 3.5553  | 0.00054142 | 0.012447 |
| FAM155B   | -0.71847 | -3.5508 | 0.00054979 | 0.012618 |
| DLGAP4    | 0.16212  | 3.5475  | 0.00055607 | 0.01274  |
| POLR2A    | 0.34371  | 3.5425  | 0.00056575 | 0.01294  |
| RNF141    | -0.27135 | -3.5404 | 0.00056971 | 0.013008 |
| MBNL1     | -0.27148 | -3.538  | 0.00057444 | 0.013054 |
| MRPL30    | -0.25943 | -3.5375 | 0.00057537 | 0.013054 |
| EREG      | -0.7815  | -3.5375 | 0.00057541 | 0.013054 |
| KLHL5     | -0.2286  | -3.5374 | 0.00057559 | 0.013054 |
| CGRRF1    | -0.34918 | -3.5364 | 0.00057764 | 0.013078 |
| COQ10B    | -0.25736 | -3.5334 | 0.0005835  | 0.013189 |
| NIPA2     | -0.17387 | -3.5329 | 0.00058464 | 0.013192 |
| RSL24D1   | -0.54752 | -3.5321 | 0.00058624 | 0.013206 |
| CCT2      | -0.24349 | -3.531  | 0.00058834 | 0.013231 |
| LAMA5     | 0.38048  | 3.5287  | 0.00059303 | 0.013314 |
| KIF2A     | -0.19982 | -3.5278 | 0.00059498 | 0.013336 |
| OSCAR     | 0.30022  | 3.5241  | 0.00060249 | 0.013467 |
| MLF1      | -0.69179 | -3.5239 | 0.00060284 | 0.013467 |
| TBC1D19   | -0.31145 | -3.5218 | 0.00060715 | 0.013527 |
| BMPR2     | -0.22215 | -3.5216 | 0.00060752 | 0.013527 |
| SPHK2     | 0.17509  | 3.5206  | 0.00060974 | 0.013554 |
| TLR9      | 0.42578  | 3.5199  | 0.00061108 | 0.013561 |
| GLI4      | 0.20708  | 3.519   | 0.000613   | 0.013581 |



Appendix 1 to Pan S, Zhou Y, Yan L, et al. TGF- $\beta$ 1 is associated with deficits in cognition and cerebral cortical thickness in first-episode schizophrenia. *J Psychiatry Neurosci* 2022. doi: 10.1503/jpn.210121  
 Copyright © 2022 The Author(s) or their employer(s).

To receive this resource in an accessible format, please contact us at [cmajgroup@cmaj.ca](mailto:cmajgroup@cmaj.ca).

Online appendices are unedited and posted as supplied by the authors.

|              |          |         |            |          |
|--------------|----------|---------|------------|----------|
| PLIN2        | -0.19949 | -3.5154 | 0.00062058 | 0.013708 |
| CHRNA10      | 0.29721  | 3.5152  | 0.00062094 | 0.013708 |
| NHLH1        | 0.44602  | 3.5141  | 0.00062331 | 0.013708 |
| TNFSF13      | 0.25678  | 3.514   | 0.00062356 | 0.013708 |
| ITM2A        | -0.32666 | -3.5139 | 0.00062385 | 0.013708 |
| DBT          | -0.19927 | -3.5131 | 0.00062558 | 0.013714 |
| SLC7A9       | 0.58741  | 3.5128  | 0.00062617 | 0.013714 |
| BLM          | -0.23458 | -3.5122 | 0.00062734 | 0.013718 |
| PAFAH1B2     | -0.22217 | -3.5107 | 0.00063063 | 0.013767 |
| URI1         | -0.16396 | -3.5095 | 0.00063326 | 0.013802 |
| STK26        | -0.22855 | -3.5088 | 0.00063475 | 0.013812 |
| FABP6        | 0.66832  | 3.5082  | 0.00063596 | 0.013816 |
| ELOVL6       | -0.31416 | -3.5076 | 0.0006374  | 0.013825 |
| CDKN2AIP     | -0.18914 | -3.506  | 0.00064089 | 0.013863 |
| CADM4        | 0.26555  | 3.5054  | 0.00064218 | 0.013863 |
| ACP6         | 0.18944  | 3.5051  | 0.00064279 | 0.013863 |
| SHLD2        | -0.23371 | -3.5049 | 0.00064327 | 0.013863 |
| KCNC3        | 0.30606  | 3.5036  | 0.00064606 | 0.013901 |
| LPAR2        | 0.32302  | 3.5029  | 0.00064766 | 0.013913 |
| NPIPA5       | 0.20396  | 3.5008  | 0.00065222 | 0.013988 |
| CRABP2       | 0.33542  | 3.5     | 0.00065397 | 0.014003 |
| THAP5        | -0.29305 | -3.4984 | 0.00065753 | 0.014056 |
| SLC25A30     | -0.19834 | -3.498  | 0.00065852 | 0.014056 |
| TMEM68       | -0.227   | -3.4942 | 0.0006671  | 0.014217 |
| RC3H2        | -0.16939 | -3.4923 | 0.00067141 | 0.014286 |
| WFIKKN1      | 0.43792  | 3.4915  | 0.00067321 | 0.014301 |
| LOC100129697 | 0.40656  | 3.4907  | 0.00067512 | 0.014319 |
| GMCL1        | -0.2337  | -3.4881 | 0.00068092 | 0.01442  |
| PIP5K1C      | 0.17068  | 3.4847  | 0.00068898 | 0.014558 |
| BAG2         | -0.25928 | -3.4844 | 0.00068961 | 0.014558 |
| PTCH2        | 0.35116  | 3.4835  | 0.00069161 | 0.014577 |
| ZNF597       | -0.20313 | -3.4801 | 0.00069972 | 0.014725 |
| CRK          | -0.24089 | -3.4796 | 0.00070091 | 0.014727 |
| PAM16        | 0.33169  | 3.479   | 0.00070237 | 0.014734 |
| SCAMP1       | -0.22687 | -3.4749 | 0.00071224 | 0.014913 |
| CORO7        | 0.21133  | 3.4745  | 0.00071312 | 0.014913 |
| CUL4B        | -0.19519 | -3.4739 | 0.00071459 | 0.014921 |
| DEK          | -0.2335  | -3.4716 | 0.00072026 | 0.015011 |
| KLHL28       | -0.28296 | -3.4712 | 0.00072114 | 0.015011 |
| HSF4         | 0.30724  | 3.4692  | 0.000726   | 0.015074 |
| RBM15        | -0.17156 | -3.469  | 0.00072643 | 0.015074 |

Appendix 1 to Pan S, Zhou Y, Yan L, et al. TGF- $\beta$ 1 is associated with deficits in cognition and cerebral cortical thickness in first-episode schizophrenia. *J Psychiatry Neurosci* 2022. doi: 10.1503/jpn.210121  
Copyright © 2022 The Author(s) or their employer(s).

To receive this resource in an accessible format, please contact us at [cmajgroup@cmaj.ca](mailto:cmajgroup@cmaj.ca).

Online appendices are unedited and posted as supplied by the authors.

|         |          |         |            |          |
|---------|----------|---------|------------|----------|
| DBF4    | -0.18904 | -3.4673 | 0.00073081 | 0.015108 |
| RFESD   | -0.46026 | -3.4671 | 0.00073117 | 0.015108 |
| ATF2    | -0.23214 | -3.4664 | 0.00073295 | 0.015108 |
| S1PR3   | 0.35328  | 3.4664  | 0.00073297 | 0.015108 |
| CEP78   | -0.28467 | -3.4661 | 0.00073377 | 0.015108 |
| MROH6   | 0.32291  | 3.4656  | 0.00073479 | 0.015108 |
| BTBD2   | 0.18669  | 3.4643  | 0.00073814 | 0.015149 |
| TICAM1  | 0.20564  | 3.4639  | 0.00073904 | 0.015149 |
| FAM102B | -0.22777 | -3.4613 | 0.00074576 | 0.015263 |
| GFPT1   | -0.16384 | -3.4605 | 0.00074767 | 0.015279 |
| RHOBTB3 | -0.37398 | -3.4591 | 0.00075133 | 0.01533  |
| N4BP2   | -0.31731 | -3.4584 | 0.00075295 | 0.01534  |
| ABCE1   | -0.21124 | -3.458  | 0.00075412 | 0.015341 |
| FOXP4   | 0.24441  | 3.4557  | 0.00075995 | 0.015436 |
| MRPS35  | -0.19234 | -3.4542 | 0.00076372 | 0.015489 |
| LIPE    | 0.20834  | 3.4527  | 0.00076764 | 0.015545 |
| NPIP3   | 0.41187  | 3.4504  | 0.00077351 | 0.01564  |
| SHC2    | 0.75184  | 3.4494  | 0.00077621 | 0.015671 |
| TAF1A1  | -0.60616 | -3.4477 | 0.00078066 | 0.015735 |
| CRYZ    | -0.28273 | -3.4473 | 0.00078171 | 0.015735 |
| C3orf38 | -0.23481 | -3.4463 | 0.00078426 | 0.015763 |
| TMTC3   | -0.31211 | -3.4428 | 0.00079362 | 0.015887 |
| POC1B   | -0.20307 | -3.4427 | 0.00079383 | 0.015887 |
| SRSF3   | -0.15177 | -3.4427 | 0.00079399 | 0.015887 |
| SMIM15  | -0.20981 | -3.4414 | 0.00079728 | 0.015922 |
| ARHGEF1 | 0.18846  | 3.4411  | 0.00079812 | 0.015922 |
| NEK7    | -0.37244 | -3.4357 | 0.00081272 | 0.016189 |
| CCDC127 | -0.15071 | -3.4346 | 0.00081578 | 0.016226 |
| RNASEK  | 0.26969  | 3.4332  | 0.00081962 | 0.016247 |
| H2AB1   | 0.41633  | 3.433   | 0.00082002 | 0.016247 |
| ITCH    | -0.18984 | -3.4329 | 0.00082043 | 0.016247 |
| EIF3L   | -0.21078 | -3.432  | 0.00082287 | 0.016248 |
| CNKSR1  | 0.29395  | 3.432   | 0.00082294 | 0.016248 |
| TBX6    | 0.34985  | 3.4298  | 0.00082911 | 0.016346 |
| TSNARE1 | 0.19687  | 3.4293  | 0.0008305  | 0.016349 |
| THNSL1  | -0.3045  | -3.4273 | 0.00083587 | 0.016431 |
| KLC2    | 0.20567  | 3.4262  | 0.00083906 | 0.01647  |
| PURA    | -0.19209 | -3.4246 | 0.00084356 | 0.01653  |
| SLC16A7 | -0.3148  | -3.4242 | 0.00084467 | 0.01653  |
| G2E3    | -0.26963 | -3.4238 | 0.00084583 | 0.01653  |
| PPP4R2  | -0.29128 | -3.4233 | 0.00084732 | 0.016535 |

Appendix 1 to Pan S, Zhou Y, Yan L, et al. TGF- $\beta$ 1 is associated with deficits in cognition and cerebral cortical thickness in first-episode schizophrenia. *J Psychiatry Neurosci* 2022. doi: 10.1503/jpn.210121  
 Copyright © 2022 The Author(s) or their employer(s).

To receive this resource in an accessible format, please contact us at [cmajgroup@cmaj.ca](mailto:cmajgroup@cmaj.ca).

Online appendices are unedited and posted as supplied by the authors.

|         |          |         |            |          |
|---------|----------|---------|------------|----------|
| CXCL1   | 0.38497  | 3.4226  | 0.00084937 | 0.016551 |
| OSBPL8  | -0.38346 | -3.4205 | 0.00085533 | 0.016625 |
| MTF2    | -0.18789 | -3.4204 | 0.00085564 | 0.016625 |
| ACER3   | -0.23274 | -3.4199 | 0.00085689 | 0.016625 |
| FKBP6   | 0.39618  | 3.4191  | 0.00085936 | 0.016644 |
| WHRN    | 0.34999  | 3.4184  | 0.00086127 | 0.016644 |
| COMMD2  | -0.18731 | -3.4183 | 0.00086156 | 0.016644 |
| RAVER1  | 0.28192  | 3.4158  | 0.00086877 | 0.016759 |
| CRIP1   | -0.24103 | -3.4144 | 0.00087295 | 0.016779 |
| ETFA    | -0.25532 | -3.4141 | 0.00087361 | 0.016779 |
| GUCA1B  | 0.26078  | 3.4133  | 0.00087597 | 0.016779 |
| NUDCD1  | -0.30337 | -3.4132 | 0.00087638 | 0.016779 |
| CEBPG   | -0.17437 | -3.4127 | 0.00087795 | 0.016779 |
| ZDHHC2  | -0.31152 | -3.4125 | 0.00087853 | 0.016779 |
| COL6A1  | 0.49141  | 3.4125  | 0.00087856 | 0.016779 |
| EGR1    | 0.42683  | 3.4117  | 0.00088075 | 0.016797 |
| TUBA4B  | 0.39023  | 3.411   | 0.00088295 | 0.016804 |
| SERINC1 | -0.20534 | -3.4107 | 0.00088361 | 0.016804 |
| GNPNAT1 | -0.22873 | -3.4081 | 0.00089142 | 0.016928 |
| TWISTNB | -0.2226  | -3.4074 | 0.00089356 | 0.016945 |
| DBN1    | 0.22043  | 3.406   | 0.00089761 | 0.016998 |
| MAPK6   | -0.22011 | -3.4051 | 0.00090045 | 0.017027 |
| DIMT1   | -0.15273 | -3.4034 | 0.00090556 | 0.0171   |
| C9orf85 | -0.20224 | -3.4029 | 0.00090701 | 0.017103 |
| NPIPA1  | 0.19359  | 3.4019  | 0.00091001 | 0.017136 |
| NPDC1   | 0.38059  | 3.4013  | 0.00091196 | 0.017148 |
| FAM217B | -0.22423 | -3.3998 | 0.00091645 | 0.0172   |
| TSPYL2  | 0.22219  | 3.3995  | 0.00091725 | 0.0172   |
| IDE     | -0.16752 | -3.3987 | 0.00091978 | 0.0172   |
| PRAF2   | 0.24542  | 3.3987  | 0.00091983 | 0.0172   |
| NSL1    | -0.18838 | -3.3973 | 0.00092425 | 0.017259 |
| PAQR6   | 0.43012  | 3.3965  | 0.00092647 | 0.017276 |
| B3GNT8  | 0.33957  | 3.3935  | 0.00093592 | 0.017426 |
| CARMIL2 | 0.19393  | 3.3931  | 0.00093709 | 0.017426 |
| OSTC    | -0.3514  | -3.3911 | 0.00094333 | 0.017517 |
| FBXO28  | -0.15811 | -3.3899 | 0.000947   | 0.017561 |
| NEDD1   | -0.22074 | -3.3891 | 0.00094973 | 0.017588 |
| ATE1    | -0.21309 | -3.3871 | 0.00095588 | 0.017673 |
| ZBTB41  | -0.36904 | -3.3868 | 0.00095697 | 0.017673 |
| LNX2    | -0.22316 | -3.3857 | 0.00096047 | 0.017713 |
| NTNG2   | 0.38771  | 3.3836  | 0.00096733 | 0.017815 |

Appendix 1 to Pan S, Zhou Y, Yan L, et al. TGF- $\beta$ 1 is associated with deficits in cognition and cerebral cortical thickness in first-episode schizophrenia. *J Psychiatry Neurosci* 2022. doi: 10.1503/jpn.210121  
 Copyright © 2022 The Author(s) or their employer(s).

To receive this resource in an accessible format, please contact us at [cmajgroup@cmaj.ca](mailto:cmajgroup@cmaj.ca).

Online appendices are unedited and posted as supplied by the authors.

|              |          |         |            |          |
|--------------|----------|---------|------------|----------|
| CACNA1A      | 0.34567  | 3.3821  | 0.00097218 | 0.01788  |
| CEP170B      | 0.31407  | 3.3805  | 0.00097722 | 0.017948 |
| FEZ1         | -0.42645 | -3.3792 | 0.00098137 | 0.018    |
| OIP5-AS1     | -0.16306 | -3.376  | 0.0009919  | 0.018133 |
| BLOC1S5      | -0.22544 | -3.3758 | 0.00099266 | 0.018133 |
| PSAT1        | -0.29446 | -3.3758 | 0.00099268 | 0.018133 |
| BTG1         | -0.16935 | -3.3737 | 0.00099937 | 0.01823  |
| EIF4E        | -0.1817  | -3.3723 | 0.0010042  | 0.018294 |
| OTX1         | 0.52835  | 3.3708  | 0.0010093  | 0.01835  |
| SP2          | 0.21512  | 3.3705  | 0.00101    | 0.01835  |
| CASTOR1      | 0.33942  | 3.369   | 0.0010151  | 0.018417 |
| ABHD10       | -0.17916 | -3.3679 | 0.0010188  | 0.018459 |
| NFYB         | -0.29173 | -3.3672 | 0.0010214  | 0.018482 |
| LOC105375589 | -0.64533 | -3.3663 | 0.0010242  | 0.018503 |
| KCND1        | 0.33448  | 3.366   | 0.0010253  | 0.018503 |
| ALDH5A1      | -0.24459 | -3.3648 | 0.0010294  | 0.018551 |
| TUBG2        | 0.20194  | 3.3641  | 0.0010317  | 0.018568 |
| OR52I1       | 0.65969  | 3.3629  | 0.0010359  | 0.018592 |
| ZNF628       | 0.22304  | 3.3625  | 0.0010372  | 0.018592 |
| NPIP2        | 0.4026   | 3.3625  | 0.0010372  | 0.018592 |
| BNIP3L       | -0.25214 | -3.36   | 0.0010458  | 0.018652 |
| SF3B4        | 0.18684  | 3.36    | 0.0010459  | 0.018652 |
| ZNF614       | -0.23101 | -3.36   | 0.001046   | 0.018652 |
| ELMOD2       | -0.22005 | -3.3599 | 0.0010461  | 0.018652 |
| SLC25A29     | 0.43891  | 3.3588  | 0.0010499  | 0.018695 |
| MINK1        | 0.16065  | 3.3583  | 0.0010519  | 0.018705 |
| MYCBP        | -0.17803 | -3.3574 | 0.0010549  | 0.018731 |
| H1-7         | 0.64762  | 3.357   | 0.0010564  | 0.018731 |
| WAS          | 0.25408  | 3.3564  | 0.0010584  | 0.018731 |
| FBXW11       | -0.15816 | -3.3562 | 0.0010589  | 0.018731 |
| ADCK1        | 0.22156  | 3.3557  | 0.001061   | 0.018735 |
| DNAJB14      | -0.29982 | -3.3554 | 0.0010619  | 0.018735 |
| HMGB1        | -0.20998 | -3.3535 | 0.0010685  | 0.018804 |
| YTHDF3       | -0.23039 | -3.3535 | 0.0010686  | 0.018804 |
| TRUB1        | -0.30367 | -3.3527 | 0.0010714  | 0.018827 |
| AMD1         | -0.18916 | -3.3522 | 0.0010731  | 0.018834 |
| ZSWIM9       | 0.30778  | 3.3501  | 0.0010805  | 0.018939 |
| SCAF1        | 0.22147  | 3.3482  | 0.0010874  | 0.019018 |
| MIS12        | -0.17462 | -3.3481 | 0.0010879  | 0.019018 |
| ERLEC1       | -0.19451 | -3.3463 | 0.0010941  | 0.019102 |
| GPR82        | -0.50123 | -3.3443 | 0.0011016  | 0.019168 |

Appendix 1 to Pan S, Zhou Y, Yan L, et al. TGF- $\beta$ 1 is associated with deficits in cognition and cerebral cortical thickness in first-episode schizophrenia. *J Psychiatry Neurosci* 2022. doi: 10.1503/jpn.210121  
 Copyright © 2022 The Author(s) or their employer(s).

To receive this resource in an accessible format, please contact us at [cmajgroup@cmaj.ca](mailto:cmajgroup@cmaj.ca).

Online appendices are unedited and posted as supplied by the authors.

|          |          |         |           |          |
|----------|----------|---------|-----------|----------|
| TFDP2    | -0.20093 | -3.3441 | 0.0011022 | 0.019168 |
| GRHL1    | -0.50931 | -3.3397 | 0.0011184 | 0.019404 |
| YES1     | -0.32762 | -3.3396 | 0.0011186 | 0.019404 |
| NOL4L    | 0.17966  | 3.3385  | 0.0011227 | 0.01945  |
| UBE2E3   | -0.16836 | -3.338  | 0.0011245 | 0.019456 |
| ADGRE1   | -0.36154 | -3.337  | 0.0011283 | 0.019497 |
| GPBP1    | -0.17861 | -3.3344 | 0.0011378 | 0.019636 |
| EIF4EBP2 | -0.17089 | -3.3324 | 0.0011453 | 0.019721 |
| DPH3     | -0.2151  | -3.3318 | 0.0011476 | 0.019721 |
| SLAIN2   | -0.17501 | -3.3316 | 0.0011485 | 0.019721 |
| AKAP5    | -0.30847 | -3.3312 | 0.0011501 | 0.019721 |
| TP53RK   | -0.18299 | -3.3312 | 0.0011501 | 0.019721 |
| KDM6B    | 0.34108  | 3.3308  | 0.0011516 | 0.019722 |
| NDC1     | -0.18013 | -3.3301 | 0.0011543 | 0.019725 |
| PTER     | -0.20766 | -3.3295 | 0.0011563 | 0.019725 |
| SERP2    | -0.62757 | -3.3293 | 0.0011573 | 0.019725 |
| PRELID3B | -0.15813 | -3.3292 | 0.0011577 | 0.019725 |
| ALOX12   | 0.19594  | 3.3264  | 0.0011681 | 0.019877 |
| PRF1     | -0.39557 | -3.3233 | 0.0011804 | 0.02006  |
| SUSD1    | -0.18486 | -3.3229 | 0.0011819 | 0.020061 |
| TSC22D4  | 0.19706  | 3.3213  | 0.0011879 | 0.020138 |
| FBXL8    | 0.21135  | 3.3207  | 0.0011903 | 0.020152 |
| ZBTB6    | -0.25109 | -3.3189 | 0.0011972 | 0.020244 |
| AP5M1    | -0.16281 | -3.3185 | 0.0011988 | 0.020246 |
| CBY1     | 0.20339  | 3.3172  | 0.001204  | 0.020293 |
| RAC3     | 0.34971  | 3.317   | 0.0012046 | 0.020293 |
| LINGO3   | 0.23563  | 3.3145  | 0.0012147 | 0.020395 |
| OXCT2    | 0.6269   | 3.314   | 0.0012166 | 0.020395 |
| GNPDA2   | -0.26294 | -3.3136 | 0.0012181 | 0.020395 |
| UCHL1    | 0.75963  | 3.3133  | 0.0012194 | 0.020395 |
| OBSCN    | 0.30499  | 3.3133  | 0.0012196 | 0.020395 |
| A1BG     | 0.72361  | 3.3128  | 0.0012215 | 0.020395 |
| DUS3L    | 0.20648  | 3.3126  | 0.0012222 | 0.020395 |
| SOCS2    | -0.20648 | -3.3125 | 0.0012229 | 0.020395 |
| RPIA     | -0.19196 | -3.3117 | 0.0012259 | 0.020421 |
| NPIP8    | 0.35141  | 3.3105  | 0.0012307 | 0.020475 |
| BLZF1    | -0.19533 | -3.3097 | 0.0012339 | 0.020504 |
| RGL3     | 0.45956  | 3.3075  | 0.0012427 | 0.020624 |
| MSANTD3  | -0.22724 | -3.3071 | 0.0012444 | 0.020626 |
| LRRRC58  | -0.2016  | -3.3058 | 0.0012499 | 0.020692 |
| NRM      | 0.20948  | 3.3012  | 0.0012688 | 0.020959 |

Appendix 1 to Pan S, Zhou Y, Yan L, et al. TGF- $\beta$ 1 is associated with deficits in cognition and cerebral cortical thickness in first-episode schizophrenia. *J Psychiatry Neurosci* 2022. doi: 10.1503/jpn.210121  
 Copyright © 2022 The Author(s) or their employer(s).

To receive this resource in an accessible format, please contact us at [cmajgroup@cmaj.ca](mailto:cmajgroup@cmaj.ca).

Online appendices are unedited and posted as supplied by the authors.

|         |          |         |           |          |
|---------|----------|---------|-----------|----------|
| MOSPD1  | -0.21768 | -3.3011 | 0.0012692 | 0.020959 |
| MFAP3L  | -0.43156 | -3.2988 | 0.0012785 | 0.021087 |
| MIER3   | -0.33107 | -3.2983 | 0.0012808 | 0.0211   |
| CRIM1   | -0.28839 | -3.2971 | 0.0012859 | 0.021158 |
| SPEG    | 0.34526  | 3.2951  | 0.0012944 | 0.021271 |
| RNF138  | -0.23684 | -3.2942 | 0.001298  | 0.021304 |
| PPP1R2  | -0.15275 | -3.292  | 0.0013071 | 0.021425 |
| BORCS7  | -0.36312 | -3.2917 | 0.0013085 | 0.021425 |
| GFOD1   | -0.28222 | -3.2909 | 0.0013121 | 0.021438 |
| ARSK    | -0.2976  | -3.2907 | 0.0013127 | 0.021438 |
| CCDC91  | -0.21393 | -3.2904 | 0.0013141 | 0.021438 |
| USP38   | -0.19755 | -3.288  | 0.0013245 | 0.021581 |
| EEA1    | -0.30097 | -3.2866 | 0.0013306 | 0.021655 |
| TIGIT   | -0.28227 | -3.2855 | 0.0013354 | 0.021707 |
| LMBRD2  | -0.30355 | -3.2851 | 0.0013371 | 0.021707 |
| CLC     | -0.68872 | -3.2818 | 0.0013513 | 0.021912 |
| ZNF780A | -0.2156  | -3.2809 | 0.0013552 | 0.021948 |
| CCND1   | 0.31587  | 3.2802  | 0.0013585 | 0.021949 |
| ZNF639  | -0.18571 | -3.2802 | 0.0013586 | 0.021949 |
| SGPP1   | -0.25108 | -3.2798 | 0.0013602 | 0.021949 |
| RAD18   | -0.16223 | -3.2793 | 0.0013623 | 0.021957 |
| REXO5   | -0.42365 | -3.2745 | 0.0013838 | 0.022257 |
| CFAP97  | -0.26088 | -3.2741 | 0.0013858 | 0.022257 |
| SLC39A6 | -0.18493 | -3.274  | 0.0013859 | 0.022257 |
| FMNL1   | 0.21058  | 3.2691  | 0.0014084 | 0.022592 |
| TERT    | 0.65057  | 3.267   | 0.0014179 | 0.022716 |
| CLDN7   | 0.37525  | 3.2641  | 0.0014315 | 0.022908 |
| PLXNA3  | 0.23997  | 3.2619  | 0.0014414 | 0.023039 |
| NUMBL   | 0.22257  | 3.2609  | 0.0014465 | 0.023092 |
| ZBTB21  | -0.24018 | -3.2599 | 0.0014508 | 0.023134 |
| UBLCP1  | -0.17706 | -3.2591 | 0.0014547 | 0.023168 |
| MIGA1   | -0.24018 | -3.257  | 0.0014646 | 0.023298 |
| SLC35D1 | -0.18715 | -3.2517 | 0.0014901 | 0.023669 |
| PLA2G4B | 0.62853  | 3.2514  | 0.0014915 | 0.023669 |
| PCSK4   | 0.33179  | 3.2501  | 0.0014978 | 0.023705 |
| RYBP    | -0.22531 | -3.2498 | 0.0014993 | 0.023705 |
| LRP5    | 0.31466  | 3.2495  | 0.0015005 | 0.023705 |
| CNN2    | 0.22098  | 3.2495  | 0.0015007 | 0.023705 |
| ERGIC2  | -0.23597 | -3.2486 | 0.0015047 | 0.023739 |
| SPAST   | -0.22126 | -3.2472 | 0.0015117 | 0.023792 |
| LRWD1   | 0.25229  | 3.2469  | 0.001513  | 0.023792 |

Appendix 1 to Pan S, Zhou Y, Yan L, et al. TGF- $\beta$ 1 is associated with deficits in cognition and cerebral cortical thickness in first-episode schizophrenia. *J Psychiatry Neurosci* 2022. doi: 10.1503/jpn.210121  
 Copyright © 2022 The Author(s) or their employer(s).

To receive this resource in an accessible format, please contact us at [cmajgroup@cmaj.ca](mailto:cmajgroup@cmaj.ca).

Online appendices are unedited and posted as supplied by the authors.

|           |          |         |           |          |
|-----------|----------|---------|-----------|----------|
| NFIC      | 0.24844  | 3.2469  | 0.0015134 | 0.023792 |
| SLC4A4    | -0.55728 | -3.2457 | 0.0015188 | 0.02385  |
| ZNF785    | 0.18647  | 3.2453  | 0.0015211 | 0.023858 |
| IGSF8     | 0.18322  | 3.2434  | 0.0015305 | 0.023978 |
| TBC1D15   | -0.19356 | -3.2425 | 0.0015346 | 0.024013 |
| SNHG3     | 0.15809  | 3.2419  | 0.0015378 | 0.024035 |
| ADORA2A   | 0.30788  | 3.2408  | 0.0015434 | 0.024095 |
| FAM204A   | -0.15799 | -3.2386 | 0.0015544 | 0.024214 |
| TMEM150B  | 0.29898  | 3.2384  | 0.0015554 | 0.024214 |
| MBOAT4    | 0.46173  | 3.2382  | 0.0015565 | 0.024214 |
| SLC22A31  | 0.77788  | 3.2367  | 0.0015638 | 0.024285 |
| ZHX1      | -0.21923 | -3.2365 | 0.0015646 | 0.024285 |
| PARP11    | -0.17821 | -3.2346 | 0.0015746 | 0.024412 |
| TMEM167A  | -0.20395 | -3.2337 | 0.0015788 | 0.024449 |
| KBTBD3    | -0.35198 | -3.2303 | 0.0015962 | 0.024676 |
| MED11     | 0.17856  | 3.23    | 0.0015978 | 0.024676 |
| NEK1      | -0.23378 | -3.2298 | 0.001599  | 0.024676 |
| KLHDC7A   | -0.98987 | -3.2287 | 0.0016043 | 0.024715 |
| GRN       | 0.27808  | 3.2286  | 0.0016052 | 0.024715 |
| SHKBP1    | 0.26455  | 3.2282  | 0.0016073 | 0.024719 |
| KLRG1     | -0.33936 | -3.2268 | 0.0016143 | 0.024779 |
| NPIP6     | 0.30857  | 3.2267  | 0.0016149 | 0.024779 |
| TSC22D3   | -0.27209 | -3.2263 | 0.0016171 | 0.024784 |
| TCEA2     | 0.17653  | 3.2254  | 0.0016218 | 0.024828 |
| GRID2IP   | 0.39342  | 3.2248  | 0.0016246 | 0.024842 |
| TENT5C    | -0.36727 | -3.2236 | 0.0016308 | 0.024893 |
| PEX2      | -0.22023 | -3.2233 | 0.0016324 | 0.024893 |
| ANKS3     | 0.2037   | 3.2231  | 0.0016335 | 0.024893 |
| ERAP1     | -0.20973 | -3.2219 | 0.0016399 | 0.024962 |
| FCHO1     | 0.20286  | 3.2209  | 0.0016451 | 0.025    |
| SNX24     | -0.2534  | -3.2207 | 0.0016462 | 0.025    |
| ENOPH1    | -0.16363 | -3.2204 | 0.0016479 | 0.025    |
| RBP2      | 0.65668  | 3.2192  | 0.0016541 | 0.025065 |
| BPGM      | -0.49966 | -3.217  | 0.001666  | 0.025206 |
| MACIR     | -0.18868 | -3.2168 | 0.0016671 | 0.025206 |
| SCP2      | -0.18699 | -3.2161 | 0.0016705 | 0.025229 |
| RAD51-AS1 | 0.25026  | 3.2147  | 0.0016785 | 0.025294 |
| TMEM238   | 0.35809  | 3.2146  | 0.0016786 | 0.025294 |
| BTF3L4    | -0.20342 | -3.2143 | 0.0016806 | 0.025296 |
| HBP1      | -0.19303 | -3.213  | 0.0016876 | 0.025373 |
| CMTM7     | 0.15967  | 3.2117  | 0.0016945 | 0.025447 |

Appendix 1 to Pan S, Zhou Y, Yan L, et al. TGF- $\beta$ 1 is associated with deficits in cognition and cerebral cortical thickness in first-episode schizophrenia. *J Psychiatry Neurosci* 2022. doi: 10.1503/jpn.210121  
 Copyright © 2022 The Author(s) or their employer(s).

To receive this resource in an accessible format, please contact us at [cmajgroup@cmaj.ca](mailto:cmajgroup@cmaj.ca).

Online appendices are unedited and posted as supplied by the authors.

|            |          |         |           |          |
|------------|----------|---------|-----------|----------|
| SLC23A2    | 0.2105   | 3.2113  | 0.0016965 | 0.025449 |
| NCDN       | 0.16554  | 3.2098  | 0.001705  | 0.025548 |
| CXCR6      | -0.40029 | -3.2092 | 0.0017079 | 0.025559 |
| C6orf226   | 0.24804  | 3.2089  | 0.0017095 | 0.025559 |
| GSKIP      | -0.31632 | -3.2063 | 0.0017239 | 0.025745 |
| CPAMD8     | 0.25989  | 3.2054  | 0.0017291 | 0.025794 |
| ALAS1      | 0.15533  | 3.2021  | 0.001747  | 0.026006 |
| H2BC15     | -0.34307 | -3.2021 | 0.0017472 | 0.026006 |
| KIAA0319   | 0.40472  | 3.2014  | 0.0017514 | 0.026029 |
| SLC30A9    | -0.18881 | -3.2007 | 0.0017551 | 0.026038 |
| PUM2       | -0.17456 | -3.1998 | 0.00176   | 0.026081 |
| CDKL1      | -0.37299 | -3.1987 | 0.0017662 | 0.026144 |
| ST6GALNAC2 | 0.36853  | 3.1967  | 0.0017776 | 0.026284 |
| C19orf54   | 0.19899  | 3.1949  | 0.0017879 | 0.026408 |
| SEMA4A     | 0.27746  | 3.1931  | 0.0017981 | 0.026529 |
| SESN3      | -0.25517 | -3.1899 | 0.0018165 | 0.02677  |
| ZNF566     | -0.22176 | -3.1886 | 0.0018241 | 0.026833 |
| ARHGAP1    | 0.17496  | 3.1885  | 0.0018247 | 0.026833 |
| CAPS       | 0.19666  | 3.1854  | 0.0018428 | 0.027042 |
| STAG2      | -0.2362  | -3.1852 | 0.0018441 | 0.027042 |
| DDTL       | 0.19017  | 3.185   | 0.001845  | 0.027042 |
| TNK1       | 0.27834  | 3.1842  | 0.0018497 | 0.027082 |
| QRICH2     | 0.23752  | 3.1803  | 0.001873  | 0.027339 |
| RHOA       | -0.25522 | -3.1803 | 0.0018732 | 0.027339 |
| COX7A2L    | -0.34968 | -3.1797 | 0.0018767 | 0.027339 |
| BORCS8     | 0.18996  | 3.1796  | 0.0018775 | 0.027339 |
| ATP9A      | -0.32088 | -3.1794 | 0.0018782 | 0.027339 |
| CARD14     | 0.32015  | 3.1788  | 0.0018818 | 0.027339 |
| ERCC4      | -0.20828 | -3.1787 | 0.0018828 | 0.027339 |
| KLF9       | -0.27023 | -3.1784 | 0.0018844 | 0.027339 |
| PRXL2C     | -0.19051 | -3.178  | 0.0018865 | 0.027339 |
| MEIS1      | -0.38344 | -3.1779 | 0.0018876 | 0.027339 |
| PPP1R16A   | 0.23382  | 3.176   | 0.0018987 | 0.027469 |
| KIF5B      | -0.24392 | -3.1747 | 0.0019066 | 0.027555 |
| ZNF184     | -0.19893 | -3.1734 | 0.0019147 | 0.027604 |
| BOLA2      | -0.39273 | -3.1731 | 0.0019161 | 0.027604 |
| SLC9A1     | 0.22485  | 3.1731  | 0.0019162 | 0.027604 |
| EHD2       | 0.47692  | 3.1719  | 0.0019235 | 0.02768  |
| ZNF816     | -0.2634  | -3.1706 | 0.0019316 | 0.027747 |
| DIPK2A     | -0.21986 | -3.1703 | 0.0019337 | 0.027747 |
| SIKE1      | -0.18288 | -3.1701 | 0.0019344 | 0.027747 |



Appendix 1 to Pan S, Zhou Y, Yan L, et al. TGF- $\beta$ 1 is associated with deficits in cognition and cerebral cortical thickness in first-episode schizophrenia. *J Psychiatry Neurosci* 2022. doi: 10.1503/jpn.210121  
 Copyright © 2022 The Author(s) or their employer(s).

To receive this resource in an accessible format, please contact us at [cmajgroup@cmaj.ca](mailto:cmajgroup@cmaj.ca).

Online appendices are unedited and posted as supplied by the authors.

|           |          |         |           |          |
|-----------|----------|---------|-----------|----------|
| SOCS4     | -0.21575 | -3.169  | 0.0019412 | 0.027802 |
| H1-10     | 0.20725  | 3.1688  | 0.0019424 | 0.027802 |
| SRSF5     | 0.18464  | 3.1685  | 0.0019445 | 0.027803 |
| CHCHD4    | -0.18344 | -3.167  | 0.001954  | 0.027908 |
| UCKL1     | 0.16316  | 3.1663  | 0.0019579 | 0.027935 |
| TXNIP     | -0.17351 | -3.1656 | 0.0019622 | 0.027967 |
| ABHD8     | 0.19206  | 3.165   | 0.0019661 | 0.027992 |
| IFIT1B    | -0.71578 | -3.1642 | 0.0019714 | 0.027993 |
| RPH3AL    | 0.30706  | 3.1639  | 0.0019731 | 0.027993 |
| COPS8     | -0.18065 | -3.1637 | 0.0019743 | 0.027993 |
| MAP3K11   | 0.20868  | 3.1637  | 0.0019745 | 0.027993 |
| NOTCH2NLA | -0.32704 | -3.1633 | 0.0019771 | 0.028    |
| FAM13B    | -0.16978 | -3.1624 | 0.0019824 | 0.02804  |
| TRPV1     | 0.17004  | 3.1621  | 0.0019841 | 0.02804  |
| GGN       | 0.47411  | 3.1601  | 0.0019968 | 0.02819  |
| LRRC37A3  | 0.28352  | 3.1594  | 0.0020011 | 0.028221 |
| IPP       | -0.18729 | -3.1589 | 0.0020048 | 0.028244 |
| DCAF10    | -0.17569 | -3.158  | 0.0020104 | 0.028293 |
| GSTO2     | 0.23723  | 3.1557  | 0.0020252 | 0.028447 |
| ELOVL7    | -0.4759  | -3.1556 | 0.0020256 | 0.028447 |
| ABCB1     | -0.2865  | -3.155  | 0.0020296 | 0.028474 |
| ZNF385A   | 0.26306  | 3.1522  | 0.0020475 | 0.028673 |
| PIK3CB    | -0.17151 | -3.1521 | 0.0020481 | 0.028673 |
| OR2H2     | 0.64536  | 3.1516  | 0.0020511 | 0.028686 |
| HPRT1     | -0.20791 | -3.15   | 0.0020615 | 0.028801 |
| UST       | -0.23407 | -3.1496 | 0.0020641 | 0.028807 |
| ERMP1     | -0.20395 | -3.1482 | 0.0020733 | 0.028893 |
| ARPC1B    | 0.20005  | 3.148   | 0.0020745 | 0.028893 |
| INAFM1    | 0.25701  | 3.1442  | 0.0020996 | 0.029212 |
| RORA      | -0.28126 | -3.1433 | 0.0021055 | 0.029263 |
| PRAG1     | 0.2419   | 3.142   | 0.0021146 | 0.029359 |
| ADGRB1    | 0.27053  | 3.1407  | 0.0021235 | 0.029452 |
| GIMAP2    | -0.27662 | -3.1397 | 0.0021298 | 0.029509 |
| HSPA1B    | 0.33085  | 3.1381  | 0.0021405 | 0.029613 |
| H2AB2     | 0.3746   | 3.1379  | 0.0021417 | 0.029613 |
| MAP3K6    | 0.18231  | 3.1372  | 0.0021466 | 0.02965  |
| NDUFS7    | 0.19225  | 3.1369  | 0.0021487 | 0.02965  |
| PLEKHG2   | 0.19258  | 3.136   | 0.0021546 | 0.0297   |
| ARHGEF10L | 0.24613  | 3.1338  | 0.0021696 | 0.029866 |
| TONSL     | 0.19273  | 3.1336  | 0.0021711 | 0.029866 |
| SAMD4B    | 0.16006  | 3.1331  | 0.0021745 | 0.029882 |

Appendix 1 to Pan S, Zhou Y, Yan L, et al. TGF- $\beta$ 1 is associated with deficits in cognition and cerebral cortical thickness in first-episode schizophrenia. *J Psychiatry Neurosci* 2022. doi: 10.1503/jpn.210121  
 Copyright © 2022 The Author(s) or their employer(s).

To receive this resource in an accessible format, please contact us at [cmajgroup@cmaj.ca](mailto:cmajgroup@cmaj.ca).

Online appendices are unedited and posted as supplied by the authors.

|          |          |         |           |          |
|----------|----------|---------|-----------|----------|
| COMMD8   | -0.46811 | -3.1327 | 0.002177  | 0.029885 |
| ZC3H3    | 0.19824  | 3.1307  | 0.002191  | 0.030047 |
| MMP25    | 0.34665  | 3.1302  | 0.0021944 | 0.030063 |
| TWF1     | -0.28278 | -3.1287 | 0.0022047 | 0.030157 |
| KLF3     | -0.20646 | -3.1286 | 0.0022057 | 0.030157 |
| GPATCH2  | -0.21046 | -3.1281 | 0.0022092 | 0.030174 |
| VANGL1   | -0.2623  | -3.1276 | 0.0022128 | 0.030192 |
| TRIM8    | 0.20109  | 3.1257  | 0.0022259 | 0.030334 |
| ZC3H18   | 0.17677  | 3.1254  | 0.0022277 | 0.030334 |
| OOEP     | 0.71437  | 3.1204  | 0.0022628 | 0.03078  |
| GAL3ST4  | 0.27234  | 3.1196  | 0.0022684 | 0.030826 |
| ANKRD13D | 0.18056  | 3.1144  | 0.0023058 | 0.03127  |
| ATL2     | -0.16489 | -3.1125 | 0.0023196 | 0.031426 |
| RFX1     | 0.20286  | 3.112   | 0.0023234 | 0.031445 |
| RFX7     | -0.25623 | -3.1113 | 0.0023284 | 0.031482 |
| ACAA2    | -0.20319 | -3.1105 | 0.0023343 | 0.03153  |
| ZCCHC10  | -0.30296 | -3.1095 | 0.0023417 | 0.031598 |
| CDC73    | -0.15    | -3.109  | 0.0023455 | 0.031617 |
| SELENOK  | -0.31002 | -3.1078 | 0.0023544 | 0.031706 |
| MAP1S    | 0.23412  | 3.1062  | 0.0023657 | 0.031825 |
| LUZP1    | -0.17592 | -3.1053 | 0.0023728 | 0.031862 |
| TMEM201  | 0.17381  | 3.1052  | 0.0023731 | 0.031862 |
| NAA15    | -0.17436 | -3.1045 | 0.0023786 | 0.031904 |
| FLJ45513 | 0.34423  | 3.1034  | 0.0023868 | 0.031981 |
| PDE1B    | 0.22959  | 3.1028  | 0.0023915 | 0.031985 |
| SPTSSB   | -0.39946 | -3.1027 | 0.0023919 | 0.031985 |
| GEMIN7   | 0.27141  | 3.1022  | 0.0023959 | 0.032008 |
| HMGCS1   | -0.20463 | -3.1011 | 0.002404  | 0.032072 |
| UGDH     | -0.16893 | -3.1004 | 0.0024091 | 0.032072 |
| NBEAL2   | 0.22358  | 3.1004  | 0.0024092 | 0.032072 |
| LCAT     | 0.16016  | 3.1003  | 0.0024103 | 0.032072 |
| PGM2L1   | -0.22175 | -3.0998 | 0.0024137 | 0.032086 |
| CAVIN2   | -0.397   | -3.0992 | 0.0024186 | 0.032118 |
| PRKCI    | -0.20798 | -3.098  | 0.0024271 | 0.032169 |
| ZMAT4    | -0.82158 | -3.098  | 0.0024272 | 0.032169 |
| RPAP3    | -0.16563 | -3.0969 | 0.0024356 | 0.032238 |
| BROX     | -0.20187 | -3.0964 | 0.0024392 | 0.032238 |
| POTEG    | 0.53528  | 3.0964  | 0.0024397 | 0.032238 |
| ZNF836   | -0.16278 | -3.0958 | 0.0024438 | 0.032238 |
| FUNDC2   | -0.44471 | -3.0956 | 0.0024454 | 0.032238 |
| CCDC25   | -0.17772 | -3.0954 | 0.0024473 | 0.032238 |

Appendix 1 to Pan S, Zhou Y, Yan L, et al. TGF- $\beta$ 1 is associated with deficits in cognition and cerebral cortical thickness in first-episode schizophrenia. *J Psychiatry Neurosci* 2022. doi: 10.1503/jpn.210121  
 Copyright © 2022 The Author(s) or their employer(s).

To receive this resource in an accessible format, please contact us at [cmajgroup@cmaj.ca](mailto:cmajgroup@cmaj.ca).

Online appendices are unedited and posted as supplied by the authors.

|           |          |         |           |          |
|-----------|----------|---------|-----------|----------|
| SYCE1     | 0.5947   | 3.0951  | 0.0024492 | 0.032238 |
| MEIS3     | 0.7805   | 3.0921  | 0.0024722 | 0.03251  |
| ARHGAP17  | 0.18988  | 3.088   | 0.0025044 | 0.032868 |
| ZNF888    | -0.21788 | -3.0878 | 0.0025055 | 0.032868 |
| SLIT1     | 0.22132  | 3.0877  | 0.0025069 | 0.032868 |
| TMEM8B    | 0.18792  | 3.0867  | 0.0025145 | 0.032936 |
| SLC25A24  | -0.26393 | -3.0859 | 0.0025209 | 0.032971 |
| CDRT4     | 0.47223  | 3.085   | 0.0025275 | 0.032971 |
| ZNF644    | -0.27235 | -3.0849 | 0.0025289 | 0.032971 |
| MSMO1     | -0.19273 | -3.0848 | 0.0025296 | 0.032971 |
| TNFRSF25  | 0.20672  | 3.0846  | 0.0025311 | 0.032971 |
| GCH1      | -0.24071 | -3.0845 | 0.0025319 | 0.032971 |
| NAGPA     | 0.1501   | 3.0837  | 0.0025378 | 0.033017 |
| NLGN2     | 0.29343  | 3.0826  | 0.0025465 | 0.033067 |
| ZNF219    | 0.19009  | 3.0826  | 0.0025469 | 0.033067 |
| ZNF420    | -0.21385 | -3.0821 | 0.0025507 | 0.033067 |
| TLR3      | -0.30851 | -3.082  | 0.0025515 | 0.033067 |
| CACYBP    | -0.16018 | -3.0814 | 0.0025566 | 0.0331   |
| ILRUN     | -0.18336 | -3.0799 | 0.0025685 | 0.033222 |
| MFGE8     | 0.22136  | 3.0773  | 0.0025887 | 0.033452 |
| UMAD1     | -0.17864 | -3.0755 | 0.0026037 | 0.033613 |
| SPDYE16   | 0.29917  | 3.0752  | 0.0026062 | 0.033613 |
| FOXD4L3   | 0.63138  | 3.0741  | 0.0026152 | 0.033697 |
| GPATCH11  | -0.19478 | -3.0731 | 0.0026234 | 0.033754 |
| USP28     | -0.19402 | -3.0729 | 0.0026247 | 0.033754 |
| CKB       | -0.41063 | -3.0719 | 0.0026324 | 0.03382  |
| ZWILCH    | -0.22154 | -3.0711 | 0.0026394 | 0.033879 |
| ZNF45     | -0.1626  | -3.0698 | 0.0026501 | 0.033983 |
| TSPAN31   | -0.17644 | -3.0664 | 0.0026778 | 0.034305 |
| ZDHHC11B  | 0.52169  | 3.0646  | 0.0026932 | 0.034456 |
| FRRS1     | -0.38177 | -3.0644 | 0.0026947 | 0.034456 |
| PDE12     | -0.15134 | -3.0639 | 0.0026985 | 0.034471 |
| SHANK1    | 0.54067  | 3.0626  | 0.0027096 | 0.03458  |
| CLDND2    | -0.41019 | -3.0606 | 0.0027267 | 0.034766 |
| TNFRSF13C | 0.29457  | 3.0579  | 0.0027493 | 0.035021 |
| CISH      | 0.22112  | 3.0574  | 0.0027537 | 0.035023 |
| PTPN6     | 0.15681  | 3.0573  | 0.0027547 | 0.035023 |
| ADCY4     | 0.29255  | 3.0569  | 0.002758  | 0.035031 |
| DUSP5     | -0.27247 | -3.0555 | 0.0027699 | 0.035135 |
| CRIP3     | 0.30939  | 3.0548  | 0.0027758 | 0.035135 |
| PPM1L     | -0.28865 | -3.0546 | 0.0027773 | 0.035135 |

Appendix 1 to Pan S, Zhou Y, Yan L, et al. TGF- $\beta$ 1 is associated with deficits in cognition and cerebral cortical thickness in first-episode schizophrenia. *J Psychiatry Neurosci* 2022. doi: 10.1503/jpn.210121  
 Copyright © 2022 The Author(s) or their employer(s).

To receive this resource in an accessible format, please contact us at [cmajgroup@cmaj.ca](mailto:cmajgroup@cmaj.ca).

Online appendices are unedited and posted as supplied by the authors.

|          |          |         |           |          |
|----------|----------|---------|-----------|----------|
| AR       | -0.58015 | -3.0546 | 0.0027773 | 0.035135 |
| TP53I11  | 0.28913  | 3.0544  | 0.0027792 | 0.035135 |
| TMEM117  | -0.30973 | -3.0532 | 0.0027901 | 0.03524  |
| RECQL    | -0.2294  | -3.0517 | 0.0028028 | 0.035367 |
| MLH3     | -0.18269 | -3.0506 | 0.002812  | 0.03545  |
| HLX      | 0.31786  | 3.0492  | 0.0028243 | 0.035571 |
| NCOR2    | 0.22778  | 3.0481  | 0.0028336 | 0.035648 |
| SLC16A13 | 0.15901  | 3.0479  | 0.0028357 | 0.035648 |
| CSAD     | 0.31185  | 3.0466  | 0.0028469 | 0.035735 |
| SPIRE2   | 0.26637  | 3.0465  | 0.002848  | 0.035735 |
| CDC42    | -0.18591 | -3.0461 | 0.0028518 | 0.03575  |
| FOXM1    | 0.3057   | 3.0439  | 0.0028707 | 0.035939 |
| NAA80    | 0.20409  | 3.0438  | 0.0028722 | 0.035939 |
| NFATC2   | -0.23686 | -3.0431 | 0.0028775 | 0.035972 |
| ZNF875   | 0.15609  | 3.0422  | 0.0028863 | 0.036048 |
| PHAX     | -0.17374 | -3.041  | 0.0028966 | 0.036087 |
| ZCCHC12  | 0.70699  | 3.0409  | 0.0028974 | 0.036087 |
| MTRNR2L8 | -0.30881 | -3.0409 | 0.0028975 | 0.036087 |
| CGGBP1   | -0.1786  | -3.0397 | 0.0029083 | 0.036188 |
| SEMA4D   | 0.18781  | 3.0394  | 0.0029111 | 0.03619  |
| PSENE1   | 0.30698  | 3.0379  | 0.0029244 | 0.036295 |
| AMN      | 0.29486  | 3.0378  | 0.002925  | 0.036295 |
| SULT1A2  | 0.5509   | 3.0364  | 0.0029382 | 0.036425 |
| PTPN22   | -0.20859 | -3.0359 | 0.0029425 | 0.036445 |
| TRIM40   | -0.67656 | -3.0353 | 0.0029479 | 0.036478 |
| SLC25A20 | -0.20882 | -3.035  | 0.0029509 | 0.036482 |
| PHF5A    | -0.30095 | -3.032  | 0.0029777 | 0.036779 |
| GCSAML   | -0.5583  | -3.0311 | 0.0029865 | 0.036854 |
| WDR86    | 0.30791  | 3.0296  | 0.0029997 | 0.036962 |
| TMEM79   | 0.1676   | 3.0295  | 0.0030008 | 0.036962 |
| CTSL     | -0.34273 | -3.0289 | 0.0030061 | 0.036969 |
| CEL      | 0.34363  | 3.0289  | 0.0030069 | 0.036969 |
| RNFT2    | 0.26788  | 3.0283  | 0.0030124 | 0.037003 |
| ESRP2    | 0.42538  | 3.0262  | 0.0030313 | 0.037173 |
| CCDC102B | -0.34432 | -3.026  | 0.0030331 | 0.037173 |
| NARS2    | -0.20089 | -3.0259 | 0.0030345 | 0.037173 |
| GRIN2D   | 0.29922  | 3.0252  | 0.0030406 | 0.037213 |
| SPTY2D1  | -0.17017 | -3.0243 | 0.0030492 | 0.037284 |
| THUMPD1  | -0.1798  | -3.0237 | 0.0030544 | 0.037315 |
| DRC1     | 0.67983  | 3.0228  | 0.0030633 | 0.037369 |
| SLC25A15 | -0.19057 | -3.0226 | 0.0030652 | 0.037369 |

Appendix 1 to Pan S, Zhou Y, Yan L, et al. TGF- $\beta$ 1 is associated with deficits in cognition and cerebral cortical thickness in first-episode schizophrenia. *J Psychiatry Neurosci* 2022. doi: 10.1503/jpn.210121  
 Copyright © 2022 The Author(s) or their employer(s).

To receive this resource in an accessible format, please contact us at [cmajgroup@cmaj.ca](mailto:cmajgroup@cmaj.ca).

Online appendices are unedited and posted as supplied by the authors.

|           |          |         |           |          |
|-----------|----------|---------|-----------|----------|
| OR52K1    | 0.56386  | 3.0224  | 0.0030673 | 0.037369 |
| TERF1     | -0.14184 | -3.0213 | 0.0030778 | 0.037422 |
| PABPC1L   | 0.25295  | 3.0209  | 0.0030808 | 0.037422 |
| POPDC2    | 0.19905  | 3.0208  | 0.0030817 | 0.037422 |
| IER5L     | 0.33044  | 3.0206  | 0.0030839 | 0.037422 |
| IRF2BP1   | 0.19564  | 3.0204  | 0.0030861 | 0.037422 |
| ARHGAP33  | 0.30812  | 3.0201  | 0.0030887 | 0.037422 |
| ZNF627    | -0.17369 | -3.0199 | 0.0030911 | 0.037422 |
| DHRS1     | 0.1538   | 3.0184  | 0.0031053 | 0.037533 |
| DGKZ      | 0.13135  | 3.0182  | 0.0031065 | 0.037533 |
| CHMP2B    | -0.17307 | -3.018  | 0.0031086 | 0.037533 |
| UCHL5     | -0.18166 | -3.0166 | 0.0031221 | 0.037662 |
| TLE2      | 0.23527  | 3.0161  | 0.0031268 | 0.037685 |
| CTSO      | -0.17561 | -3.0155 | 0.0031327 | 0.037709 |
| RBAK      | -0.24386 | -3.0148 | 0.0031389 | 0.037729 |
| HAUS5     | 0.1679   | 3.0136  | 0.0031512 | 0.037843 |
| DGKA      | 0.17435  | 3.0126  | 0.0031608 | 0.037903 |
| PABPN1    | 0.18218  | 3.0125  | 0.0031619 | 0.037903 |
| IKZF5     | -0.20597 | -3.0108 | 0.0031783 | 0.038066 |
| THAP1     | -0.19098 | -3.0095 | 0.0031902 | 0.03813  |
| FOXP3     | 0.3144   | 3.0094  | 0.0031921 | 0.03813  |
| BSCL2     | 0.33687  | 3.0093  | 0.0031921 | 0.03813  |
| PPP1R3E   | 0.19822  | 3.0058  | 0.0032268 | 0.038509 |
| RAB3A     | 0.24117  | 3.0049  | 0.0032362 | 0.038587 |
| AP5Z1     | 0.13437  | 3.0042  | 0.0032427 | 0.03863  |
| TMX1      | -0.25325 | -3.0029 | 0.0032557 | 0.038745 |
| NCEH1     | -0.22419 | -3.0027 | 0.0032581 | 0.038745 |
| PRKD2     | 0.18266  | 3.0008  | 0.003277  | 0.038888 |
| ACAP3     | 0.14741  | 3.0007  | 0.0032778 | 0.038888 |
| SLC30A7   | -0.19141 | -3.0006 | 0.0032788 | 0.038888 |
| HIGD1A    | -0.32412 | -2.9977 | 0.0033078 | 0.039197 |
| TMEM184B  | 0.18139  | 2.9953  | 0.0033323 | 0.039422 |
| SINHCAF   | -0.16732 | -2.9952 | 0.0033326 | 0.039422 |
| VIT       | -0.57276 | -2.9945 | 0.0033398 | 0.039472 |
| H2AX      | 0.22071  | 2.9933  | 0.0033525 | 0.039587 |
| SWSAP1    | 0.18513  | 2.9928  | 0.0033579 | 0.039617 |
| CD160     | -0.41663 | -2.9917 | 0.003369  | 0.039713 |
| PRDM8     | 0.20877  | 2.9913  | 0.003373  | 0.039725 |
| ZNF22-AS1 | -0.31529 | -2.9895 | 0.003391  | 0.039902 |
| ADCK5     | 0.19024  | 2.988   | 0.0034073 | 0.040059 |
| PAF1      | 0.15838  | 2.9877  | 0.0034104 | 0.04006  |

Appendix 1 to Pan S, Zhou Y, Yan L, et al. TGF- $\beta$ 1 is associated with deficits in cognition and cerebral cortical thickness in first-episode schizophrenia. *J Psychiatry Neurosci* 2022. doi: 10.1503/jpn.210121  
 Copyright © 2022 The Author(s) or their employer(s).

To receive this resource in an accessible format, please contact us at [cmajgroup@cmaj.ca](mailto:cmajgroup@cmaj.ca).

Online appendices are unedited and posted as supplied by the authors.

|          |          |         |           |          |
|----------|----------|---------|-----------|----------|
| KIAA0556 | 0.20605  | 2.9869  | 0.0034186 | 0.040091 |
| PLA2G15  | 0.19287  | 2.9868  | 0.0034191 | 0.040091 |
| KRT5     | -0.66278 | -2.9864 | 0.0034238 | 0.040112 |
| FBXO41   | 0.16779  | 2.9851  | 0.0034366 | 0.040206 |
| MYBL1    | -0.38532 | -2.985  | 0.0034378 | 0.040206 |
| MIR4326  | 0.4675   | 2.9841  | 0.0034476 | 0.040285 |
| AGPAT5   | -0.19917 | -2.9828 | 0.003461  | 0.040372 |
| FBXO30   | -0.23098 | -2.9828 | 0.0034611 | 0.040372 |
| PCDH1    | -0.44492 | -2.9819 | 0.0034705 | 0.040436 |
| SPPL2B   | 0.18034  | 2.9817  | 0.0034725 | 0.040436 |
| SH3BP2   | 0.15579  | 2.9798  | 0.0034928 | 0.040637 |
| PDGFRA   | -0.61296 | -2.9778 | 0.0035143 | 0.040851 |
| TMEM123  | -0.2371  | -2.9756 | 0.0035375 | 0.041053 |
| ACTR6    | -0.34882 | -2.9751 | 0.0035425 | 0.041053 |
| OSGIN2   | -0.26675 | -2.975  | 0.0035441 | 0.041053 |
| KLRC1    | -0.59889 | -2.9749 | 0.003545  | 0.041053 |
| TRIM32   | -0.15463 | -2.9745 | 0.0035489 | 0.041053 |
| ZNF687   | 0.15396  | 2.9744  | 0.0035501 | 0.041053 |
| RPS24    | -0.20531 | -2.9742 | 0.0035531 | 0.041053 |
| CBX2     | 0.36471  | 2.9733  | 0.0035621 | 0.041122 |
| AP1G2    | 0.14925  | 2.9725  | 0.0035711 | 0.04119  |
| IMPA1    | -0.22513 | -2.9715 | 0.0035814 | 0.041273 |
| SVIP     | -0.21964 | -2.9706 | 0.0035914 | 0.041354 |
| CDK6     | -0.2014  | -2.9695 | 0.0036039 | 0.041462 |
| SSH3     | 0.19927  | 2.9691  | 0.0036075 | 0.041468 |
| TRMT10C  | -0.22034 | -2.9689 | 0.0036106 | 0.041468 |
| SMARCA5  | -0.15833 | -2.9678 | 0.0036222 | 0.041552 |
| KMT2B    | 0.18024  | 2.9676  | 0.0036241 | 0.041552 |
| CASD1    | -0.20122 | -2.9664 | 0.0036381 | 0.041677 |
| NEK5     | -0.45563 | -2.9655 | 0.0036474 | 0.041748 |
| IL12RB2  | -0.30173 | -2.962  | 0.0036869 | 0.042161 |
| ARL13B   | -0.35012 | -2.9617 | 0.0036898 | 0.042161 |
| BNC2     | -0.6165  | -2.9588 | 0.0037219 | 0.042492 |
| TBC1D3B  | 0.29853  | 2.9566  | 0.0037472 | 0.042667 |
| EEF1A1   | -0.35271 | -2.9565 | 0.0037481 | 0.042667 |
| MIR9-3HG | -0.29431 | -2.9562 | 0.0037521 | 0.042667 |
| DHODH    | 0.15296  | 2.9561  | 0.0037527 | 0.042667 |
| PADI4    | 0.36309  | 2.9558  | 0.0037565 | 0.042667 |
| KIF21A   | -0.31943 | -2.9556 | 0.0037584 | 0.042667 |
| ARFIP1   | -0.19997 | -2.9553 | 0.0037614 | 0.042667 |
| ARL14EP  | -0.17115 | -2.9552 | 0.0037626 | 0.042667 |

Appendix 1 to Pan S, Zhou Y, Yan L, et al. TGF- $\beta$ 1 is associated with deficits in cognition and cerebral cortical thickness in first-episode schizophrenia. *J Psychiatry Neurosci* 2022. doi: 10.1503/jpn.210121  
 Copyright © 2022 The Author(s) or their employer(s).

To receive this resource in an accessible format, please contact us at [cmajgroup@cmaj.ca](mailto:cmajgroup@cmaj.ca).

Online appendices are unedited and posted as supplied by the authors.

|          |          |         |           |          |
|----------|----------|---------|-----------|----------|
| RSBN1    | -0.15523 | -2.9548 | 0.0037675 | 0.042685 |
| SLC4A2   | 0.1468   | 2.9544  | 0.0037722 | 0.042703 |
| APBB3    | 0.22496  | 2.9528  | 0.0037907 | 0.042828 |
| SORBS3   | 0.21489  | 2.9527  | 0.0037917 | 0.042828 |
| GAA      | 0.21702  | 2.9526  | 0.0037929 | 0.042828 |
| MOSPD3   | 0.17509  | 2.9522  | 0.0037973 | 0.042843 |
| RNF44    | 0.21723  | 2.951   | 0.0038105 | 0.042955 |
| SPACA6   | 0.36962  | 2.9501  | 0.0038207 | 0.043034 |
| SCLY     | 0.24158  | 2.9491  | 0.003833  | 0.043134 |
| UBE3A    | -0.17846 | -2.9488 | 0.003836  | 0.043134 |
| GNGT2    | -0.25347 | -2.9479 | 0.0038466 | 0.043217 |
| DAAM1    | -0.2546  | -2.9468 | 0.0038589 | 0.043319 |
| MRI1     | 0.18518  | 2.945   | 0.0038805 | 0.043513 |
| LYPD3    | 0.2436   | 2.9448  | 0.0038827 | 0.043513 |
| RSPRY1   | -0.14354 | -2.944  | 0.0038916 | 0.043576 |
| PAPOLA   | -0.16552 | -2.9429 | 0.0039056 | 0.043697 |
| LTB      | 0.20313  | 2.9414  | 0.0039227 | 0.043851 |
| RHPN1    | 0.23193  | 2.9408  | 0.0039292 | 0.043888 |
| TEC      | -0.19666 | -2.9402 | 0.0039365 | 0.043933 |
| IL4R     | 0.22123  | 2.9382  | 0.003961  | 0.044133 |
| UBA1     | 0.1799   | 2.937   | 0.0039745 | 0.044221 |
| YOD1     | -0.25309 | -2.937  | 0.0039755 | 0.044221 |
| RCOR2    | 0.59825  | 2.9364  | 0.0039826 | 0.044263 |
| DNMT3B   | 0.3018   | 2.9359  | 0.0039878 | 0.044271 |
| TEX22    | 0.23367  | 2.9357  | 0.0039899 | 0.044271 |
| ZFP41    | 0.17404  | 2.9354  | 0.0039935 | 0.044275 |
| UNC93B1  | 0.22293  | 2.935   | 0.003999  | 0.0443   |
| GNG7     | 0.20894  | 2.9341  | 0.0040098 | 0.044357 |
| EID1     | -0.19508 | -2.934  | 0.0040108 | 0.044357 |
| RPE      | -0.18452 | -2.9324 | 0.0040307 | 0.044488 |
| ARHGEF11 | 0.21063  | 2.9322  | 0.0040325 | 0.044488 |
| SPIN4    | -0.3661  | -2.9321 | 0.0040334 | 0.044488 |
| NFKBIB   | 0.15852  | 2.9319  | 0.004036  | 0.044488 |
| TKTL1    | -0.39919 | -2.9316 | 0.0040396 | 0.044492 |
| PHLDA1   | -0.30375 | -2.9306 | 0.0040525 | 0.04452  |
| PRR12    | 0.23925  | 2.9306  | 0.0040525 | 0.04452  |
| APOBEC3A | 0.36201  | 2.9305  | 0.004053  | 0.04452  |
| ZNF568   | -0.21838 | -2.9303 | 0.0040554 | 0.04452  |
| PTGDR2   | -0.33777 | -2.929  | 0.0040719 | 0.044665 |
| CASTOR3  | 0.18505  | 2.9281  | 0.0040831 | 0.04475  |
| IFITM5   | -0.70265 | -2.9268 | 0.0040983 | 0.044844 |

Appendix 1 to Pan S, Zhou Y, Yan L, et al. TGF- $\beta$ 1 is associated with deficits in cognition and cerebral cortical thickness in first-episode schizophrenia. *J Psychiatry Neurosci* 2022. doi: 10.1503/jpn.210121  
 Copyright © 2022 The Author(s) or their employer(s).

To receive this resource in an accessible format, please contact us at [cmajgroup@cmaj.ca](mailto:cmajgroup@cmaj.ca).

Online appendices are unedited and posted as supplied by the authors.

|           |          |         |           |          |
|-----------|----------|---------|-----------|----------|
| C4orf46   | -0.15552 | -2.9268 | 0.0040988 | 0.044844 |
| HCP5      | -0.20703 | -2.9264 | 0.0041028 | 0.044844 |
| ARSA      | 0.192    | 2.9263  | 0.004105  | 0.044844 |
| C11orf58  | -0.1565  | -2.9253 | 0.0041175 | 0.044944 |
| ZNF12     | -0.18542 | -2.9247 | 0.0041243 | 0.044982 |
| SLC22A7   | 0.6602   | 2.9244  | 0.004128  | 0.044986 |
| LOC400499 | 0.35706  | 2.924   | 0.0041334 | 0.04499  |
| H2AB3     | 0.33935  | 2.9238  | 0.0041351 | 0.04499  |
| SETD1B    | 0.23859  | 2.9204  | 0.0041775 | 0.045395 |
| RELA-DT   | 0.18441  | 2.9203  | 0.004179  | 0.045395 |
| NTPCR     | -0.21439 | -2.9199 | 0.0041843 | 0.045415 |
| DHX34     | 0.23269  | 2.919   | 0.0041949 | 0.045469 |
| SPI1      | 0.27103  | 2.9189  | 0.004196  | 0.045469 |
| TMEM272   | 0.35417  | 2.9179  | 0.0042092 | 0.045492 |
| RTL8C     | 0.16905  | 2.9177  | 0.0042121 | 0.045492 |
| INPP5E    | 0.17968  | 2.9174  | 0.004216  | 0.045492 |
| OPLAH     | 0.3965   | 2.9173  | 0.0042171 | 0.045492 |
| CUL5      | -0.24866 | -2.9171 | 0.0042189 | 0.045492 |
| ADH5      | -0.20078 | -2.9168 | 0.0042225 | 0.045492 |
| DGLUCY    | 0.17283  | 2.9166  | 0.0042253 | 0.045492 |
| SEMA6C    | 0.18936  | 2.9166  | 0.0042259 | 0.045492 |
| PHF14     | -0.18781 | -2.9163 | 0.0042287 | 0.045492 |
| STRADA    | 0.15594  | 2.916   | 0.0042327 | 0.045499 |
| SH2B2     | 0.25883  | 2.915   | 0.004246  | 0.045605 |
| MAPK13    | 0.18009  | 2.9146  | 0.0042515 | 0.045628 |
| ETS1      | -0.19824 | -2.9118 | 0.0042866 | 0.045968 |
| GSK3A     | 0.16768  | 2.9092  | 0.0043205 | 0.046295 |
| UNC5CL    | 0.20904  | 2.9076  | 0.0043403 | 0.04647  |
| CSK       | 0.14811  | 2.9074  | 0.0043438 | 0.046471 |
| MXI1      | -0.37444 | -2.9055 | 0.0043678 | 0.046689 |
| HSBP1L1   | 0.23267  | 2.9052  | 0.0043715 | 0.046691 |
| NDUFA11   | 0.2507   | 2.9034  | 0.0043956 | 0.046897 |
| EFR3A     | -0.21235 | -2.9032 | 0.0043977 | 0.046897 |
| CYB5R2    | 0.42812  | 2.9029  | 0.0044021 | 0.046907 |
| PSMD10    | -0.26125 | -2.9021 | 0.0044126 | 0.046982 |
| PGBD1     | 0.32204  | 2.8998  | 0.0044426 | 0.047263 |
| KRTCAP2   | 0.18094  | 2.8993  | 0.0044489 | 0.047293 |
| DYNLT3    | -0.21241 | -2.8988 | 0.0044564 | 0.047335 |
| GOLT1B    | -0.22068 | -2.8983 | 0.0044632 | 0.04737  |
| DNAJA1    | -0.20314 | -2.8979 | 0.0044677 | 0.04738  |
| CMIP      | 0.2328   | 2.8974  | 0.0044746 | 0.047416 |



Appendix 1 to Pan S, Zhou Y, Yan L, et al. TGF- $\beta$ 1 is associated with deficits in cognition and cerebral cortical thickness in first-episode schizophrenia. *J Psychiatry Neurosci* 2022. doi: 10.1503/jpn.210121  
 Copyright © 2022 The Author(s) or their employer(s).

To receive this resource in an accessible format, please contact us at [cmajgroup@cmaj.ca](mailto:cmajgroup@cmaj.ca).

Online appendices are unedited and posted as supplied by the authors.

|          |          |         |           |          |
|----------|----------|---------|-----------|----------|
| LYRM2    | -0.19578 | -2.8971 | 0.0044792 | 0.047427 |
| GZMH     | -0.47273 | -2.8967 | 0.0044844 | 0.047427 |
| SLC39A2  | 0.49902  | 2.8964  | 0.0044881 | 0.047427 |
| PFKP     | 0.19531  | 2.8962  | 0.004491  | 0.047427 |
| SUB1     | -0.26936 | -2.896  | 0.0044933 | 0.047427 |
| PRKG2    | -0.67296 | -2.8955 | 0.0044995 | 0.047434 |
| DOK3     | 0.29469  | 2.8952  | 0.0045033 | 0.047434 |
| ZNF692   | 0.21343  | 2.8952  | 0.0045046 | 0.047434 |
| C9orf78  | -0.38326 | -2.8946 | 0.0045118 | 0.047473 |
| CNOT8    | -0.13054 | -2.894  | 0.0045204 | 0.047526 |
| SLC38A10 | 0.17064  | 2.8936  | 0.0045253 | 0.04754  |
| PRR7     | 0.18992  | 2.8928  | 0.004536  | 0.047594 |
| CXCR3    | 0.29148  | 2.8925  | 0.0045399 | 0.047594 |
| ATG4C    | -0.16081 | -2.8924 | 0.0045411 | 0.047594 |
| MARK2    | 0.17872  | 2.8913  | 0.0045567 | 0.047721 |
| ABCB10   | -0.23096 | -2.8902 | 0.0045716 | 0.04784  |
| PLIN4    | 0.35524  | 2.8876  | 0.0046067 | 0.048154 |
| SLC26A11 | 0.22632  | 2.8875  | 0.0046088 | 0.048154 |
| IQCIN    | 0.29327  | 2.886   | 0.0046282 | 0.048319 |
| HSPA1A   | 0.29543  | 2.8855  | 0.0046353 | 0.048355 |
| TMED2    | -0.17383 | -2.8845 | 0.004649  | 0.048441 |
| SV2A     | 0.22433  | 2.8844  | 0.0046507 | 0.048441 |
| ZNF595   | -0.36536 | -2.8836 | 0.0046624 | 0.048525 |
| MYO16    | 0.61428  | 2.8827  | 0.004674  | 0.048572 |
| AP1AR    | -0.24959 | -2.8823 | 0.0046795 | 0.048572 |
| MAZ      | 0.20081  | 2.8822  | 0.0046813 | 0.048572 |
| MYO15B   | 0.21432  | 2.8822  | 0.0046814 | 0.048572 |
| MIR331   | 0.55562  | 2.8815  | 0.0046915 | 0.048639 |
| ATP5PB   | -0.20238 | -2.8803 | 0.0047078 | 0.04872  |
| PRCD     | 0.31942  | 2.8801  | 0.0047111 | 0.04872  |
| PODNL1   | 0.29345  | 2.8798  | 0.0047147 | 0.04872  |
| TAOK1    | -0.21019 | -2.8798 | 0.0047152 | 0.04872  |
| SLC22A17 | 0.28521  | 2.8796  | 0.0047181 | 0.04872  |
| ANKRD34A | 0.26449  | 2.8792  | 0.0047232 | 0.04872  |
| MMP9     | 0.5271   | 2.8791  | 0.0047247 | 0.04872  |
| KLHL26   | 0.13903  | 2.8786  | 0.0047316 | 0.048754 |
| LIG1     | 0.15291  | 2.8777  | 0.0047447 | 0.048851 |
| RFK      | -0.20315 | -2.8762 | 0.0047652 | 0.049025 |
| LIN9     | -0.29983 | -2.8755 | 0.0047746 | 0.049046 |
| ADCY10P1 | 0.31885  | 2.8754  | 0.0047767 | 0.049046 |
| CCDC32   | 0.17346  | 2.8753  | 0.0047782 | 0.049046 |

Appendix 1 to Pan S, Zhou Y, Yan L, et al. TGF- $\beta$ 1 is associated with deficits in cognition and cerebral cortical thickness in first-episode schizophrenia. *J Psychiatry Neurosci* 2022. doi: 10.1503/jpn.210121  
Copyright © 2022 The Author(s) or their employer(s).

To receive this resource in an accessible format, please contact us at [cmajgroup@cmaj.ca](mailto:cmajgroup@cmaj.ca).

Online appendices are unedited and posted as supplied by the authors.

|         |          |         |           |          |
|---------|----------|---------|-----------|----------|
| TIPRL   | -0.15414 | -2.8749 | 0.0047836 | 0.049058 |
| WWP1    | -0.15879 | -2.8747 | 0.0047867 | 0.049058 |
| BAG1    | -0.51365 | -2.8734 | 0.0048052 | 0.04921  |
| AZI2    | -0.19989 | -2.8729 | 0.0048115 | 0.049237 |
| FRS2    | -0.18436 | -2.8718 | 0.0048282 | 0.049337 |
| CLCN6   | 0.16044  | 2.8717  | 0.0048286 | 0.049337 |
| PCDH17  | -0.51426 | -2.8714 | 0.0048335 | 0.04935  |
| CASR    | 0.68305  | 2.871   | 0.0048398 | 0.049365 |
| ZNF654  | -0.24164 | -2.8707 | 0.0048433 | 0.049365 |
| MCAM    | 0.45949  | 2.8705  | 0.004846  | 0.049365 |
| HPF1    | -0.19702 | -2.8701 | 0.0048527 | 0.049395 |
| SLCO4A1 | 0.41719  | 2.8681  | 0.0048813 | 0.049649 |
| SNRPA   | 0.17117  | 2.8659  | 0.0049127 | 0.04993  |
| MLC1    | -0.33466 | -2.8653 | 0.0049207 | 0.049974 |

---

Appendix 1 to Pan S, Zhou Y, Yan L, et al. TGF- $\beta$ 1 is associated with deficits in cognition and cerebral cortical thickness in first-episode schizophrenia. *J Psychiatry Neurosci* 2022. doi: 10.1503/jpn.210121  
Copyright © 2022 The Author(s) or their employer(s).

To receive this resource in an accessible format, please contact us at [cmajgroup@cmaj.ca](mailto:cmajgroup@cmaj.ca).

Online appendices are unedited and posted as supplied by the authors.

Appendix 1 to Pan S, Zhou Y, Yan L, et al. TGF- $\beta$ 1 is associated with deficits in cognition and cerebral cortical thickness in first-episode schizophrenia. *J Psychiatry Neurosci* 2022. doi: 10.1503/jpn.210121

Copyright © 2022 The Author(s) or their employer(s).

To receive this resource in an accessible format, please contact us at [cmajgroup@cmaj.ca](mailto:cmajgroup@cmaj.ca).

Online appendices are unedited and posted as supplied by the authors.

## Table S2

### Blood DEGs\_DAVID\_MF

#### Annotation Cluster 1 Enrichment Score: 1.263220299756809

| Category             | Term                                                                    | Count | %     | PValue | Genes                      | List Total | Pop Hits | Pop Total | Fold Enrichment | Bonferroni | Benjamini | FDR   |
|----------------------|-------------------------------------------------------------------------|-------|-------|--------|----------------------------|------------|----------|-----------|-----------------|------------|-----------|-------|
| GOTERM_M<br>F_DIRECT | GO:0005114~type II transforming growth factor beta receptor binding     | 4     | 0.313 | 0.008  | TGFBR3, TGFB1, TGFBR1, ENG | 1105       | 7        | 16881     | 8.730           | 1          | 0.909     | 0.909 |
| GOTERM_M<br>F_DIRECT | GO:0005024~trans forming growth factor beta-activated receptor activity | 3     | 0.235 | 0.072  | TGFBR3, TGFBR1, ENG        | 1105       | 7        | 16881     | 6.547           | 1          | 1         | 1     |
| GOTERM_M<br>F_DIRECT | GO:0050431~trans forming growth factor beta binding                     | 3     | 0.235 | 0.282  | TGFBR3, TGFBR1, ENG        | 1105       | 16       | 16881     | 2.864           | 1          | 1         | 1     |

Appendix 1 to Pan S, Zhou Y, Yan L, et al. TGF- $\beta$ 1 is associated with deficits in cognition and cerebral cortical thickness in first-episode schizophrenia. *J Psychiatry Neurosci* 2022. doi: 10.1503/jpn.210121

Copyright © 2022 The Author(s) or their employer(s).

To receive this resource in an accessible format, please contact us at [cmajgroup@cmaj.ca](mailto:cmajgroup@cmaj.ca).

Online appendices are unedited and posted as supplied by the authors.

**Annotation Cluster 2    Enrichment Score:0.7242223147442225**

| Category             | Term                                                | Count | %     | PValue | Genes                                                  | List Total | Pop Hits | Pop Total | Fold Enrichment | Bonferroni | Benjamini | FDR |
|----------------------|-----------------------------------------------------|-------|-------|--------|--------------------------------------------------------|------------|----------|-----------|-----------------|------------|-----------|-----|
| GOTERM_M<br>F_DIRECT | GO:0005158~insulin receptor binding                 | 5     | 0.391 | 0.141  | DOK3,<br>FRS2,<br>PTPN11,<br>PIK3R1,<br>INSL3<br>TLR9, | 1105       | 31       | 16881     | 2.464           | 1          | 1         | 1   |
| GOTERM_M<br>F_DIRECT | GO:0016303~1 phosphatidylinositol-3-kinase activity | 6     | 0.469 | 0.148  | PIK3R3,<br>FRS2,<br>PTPN11,<br>PIK3CB,<br>PIK3R1       | 1105       | 43       | 16881     | 2.132           | 1          | 1         | 1   |
| GOTERM_M<br>F_DIRECT | GO:0043560~insulin receptor substrate binding       | 3     | 0.235 | 0.159  | PTPN11,<br>PIK3CB,<br>PIK3R1                           | 1105       | 11       | 16881     | 4.166           | 1          | 1         | 1   |

Appendix 1 to Pan S, Zhou Y, Yan L, et al. TGF- $\beta$ 1 is associated with deficits in cognition and cerebral cortical thickness in first-episode schizophrenia. *J Psychiatry Neurosci* 2022. doi: 10.1503/jpn.210121

Copyright © 2022 The Author(s) or their employer(s).

To receive this resource in an accessible format, please contact us at [cmajgroup@cmaj.ca](mailto:cmajgroup@cmaj.ca).

Online appendices are unedited and posted as supplied by the authors.

|                      |                                                                    |   |       |       |                                                           |      |    |       |       |   |   |   |
|----------------------|--------------------------------------------------------------------|---|-------|-------|-----------------------------------------------------------|------|----|-------|-------|---|---|---|
| GOTERM_M<br>F_DIRECT | GO:0046934~phosphatidylinositol-4,5-bisphosphate 3-kinase activity | 6 | 0.469 | 0.382 | PDGFRA,<br>FRS2,<br>PTPN11,<br>PIK3CB,<br>PIK3R1,<br>EREG | 1105 | 62 | 16881 | 1.478 | 1 | 1 | 1 |
|----------------------|--------------------------------------------------------------------|---|-------|-------|-----------------------------------------------------------|------|----|-------|-------|---|---|---|

**Annotation Cluster 3 Enrichment Score: 0.6351404184118774**

| Category             | Term                                   | Count | %     | PValue | Genes                                   | List Total | Pop Hits | Pop Total | Fold Enrichment | Bonferroni | Benjamini | FDR   |
|----------------------|----------------------------------------|-------|-------|--------|-----------------------------------------|------------|----------|-----------|-----------------|------------|-----------|-------|
| GOTERM_M<br>F_DIRECT | GO:0030215~semaphorin receptor binding | 4     | 0.313 | 0.188  | SEMA6C,<br>SEMA4A,<br>SEMA4D,<br>SEMA4B | 1105       | 23       | 16881     | 2.657           | 1          | 0.909     | 0.909 |
| GOTERM_M<br>F_DIRECT | GO:0038191~neuropilin binding          | 3     | 0.235 | 0.257  | SEMA4A,<br>SEMA4D,<br>SEMA4B            | 1105       | 15       | 16881     | 3.055           | 1          | 1         | 1     |
| GOTERM_M<br>F_DIRECT | GO:0045499~chemorepellent activity     | 4     | 0.313 | 0.258  | SEMA6C,<br>SEMA4A,<br>SEMA4D,<br>SEMA4B | 1105       | 27       | 16881     | 2.263           | 1          | 1         | 1     |

Appendix 1 to Pan S, Zhou Y, Yan L, et al. TGF- $\beta$ 1 is associated with deficits in cognition and cerebral cortical thickness in first-episode schizophrenia. *J Psychiatry Neurosci* 2022. doi: 10.1503/jpn.210121

Copyright © 2022 The Author(s) or their employer(s).

To receive this resource in an accessible format, please contact us at cmajgroup@cmaj.ca.

Online appendices are unedited and posted as supplied by the authors.

**Blood DEGs\_DAVID\_BP**

**Annotation Cluster 1 Enrichment Score: 1.4834379008856098**

| Category             | Term                                           | Count | %     | PValue | Genes                                                               | List Total | Pop Hits | Pop Total | Fold Enrichment | Bonferroni | Benjamini | FDR |
|----------------------|------------------------------------------------|-------|-------|--------|---------------------------------------------------------------------|------------|----------|-----------|-----------------|------------|-----------|-----|
| GOTERM_B<br>P_DIRECT | GO:0071577~zinc II ion transmembrane transport | 6     | 0.469 | 0.005  | SLC30A7,<br>SLC30A6,<br>SLC30A4,<br>SLC39A6,<br>SLC30A1,<br>SLC39A2 | 1096       | 18       | 16792     | 5.107           | 1          | 1         | 1   |

Appendix 1 to Pan S, Zhou Y, Yan L, et al. TGF- $\beta$ 1 is associated with deficits in cognition and cerebral cortical thickness in first-episode schizophrenia. *J Psychiatry Neurosci* 2022. doi: 10.1503/jpn.210121

Copyright © 2022 The Author(s) or their employer(s).

To receive this resource in an accessible format, please contact us at [cmajgroup@cmaj.ca](mailto:cmajgroup@cmaj.ca).

Online appendices are unedited and posted as supplied by the authors.

|                      |                                                   |   |       |       |                                             |      |    |       |       |   |   |   |
|----------------------|---------------------------------------------------|---|-------|-------|---------------------------------------------|------|----|-------|-------|---|---|---|
| GOTERM_B<br>P_DIRECT | GO:0061088~regulation of sequestering of zinc ion | 4 | 0.313 | 0.173 | SLC30A7,<br>SLC30A6,<br>SLC30A4,<br>SLC30A1 | 1096 | 9  | 16792 | 6.809 | 1 | 1 | 1 |
| GOTERM_B<br>P_DIRECT | GO:0010043~response to zinc ion                   | 4 | 0.313 | 0.420 | SLC30A7,<br>SLC30A6,<br>SLC30A4,<br>SLC30A1 | 1096 | 36 | 16792 | 1.702 | 1 | 1 | 1 |

**Annotation Cluster 2      Enrichment Score: 1.065281899558422**

| Category             | Term                                                        | Count | %     | PValue | Genes                               | List Total | Pop Hits | Pop Total | Fold Enrichment | Bonferroni | Benjamini | FDR |
|----------------------|-------------------------------------------------------------|-------|-------|--------|-------------------------------------|------------|----------|-----------|-----------------|------------|-----------|-----|
| GOTERM_B<br>P_DIRECT | GO:0032700~negative regulation of interleukin-17 production | 4     | 0.313 | 0.031  | PRNP,<br>TGFB1,<br>TNFSF4,<br>FOXP3 | 1096       | 11       | 16792     | 5.571           | 1          | 1         | 1   |



Appendix 1 to Pan S, Zhou Y, Yan L, et al. TGF- $\beta$ 1 is associated with deficits in cognition and cerebral cortical thickness in first-episode schizophrenia. *J Psychiatry Neurosci* 2022. doi: 10.1503/jpn.210121

Copyright © 2022 The Author(s) or their employer(s).

To receive this resource in an accessible format, please contact us at [cmajgroup@cmaj.ca](mailto:cmajgroup@cmaj.ca).

Online appendices are unedited and posted as supplied by the authors.

|                      |                                                                                               |   |       |       |                                                                 |      |    |       |       |   |   |   |
|----------------------|-----------------------------------------------------------------------------------------------|---|-------|-------|-----------------------------------------------------------------|------|----|-------|-------|---|---|---|
| GOTERM_B<br>P_DIRECT | GO:0032689~negative regulation of interferon-gamma production                                 | 5 | 0.391 | 0.106 | PRNP,<br>TNFSF4,<br>HMGB1,<br>FOXP3,<br>HAVCR2                  | 1096 | 28 | 16792 | 2.736 | 1 | 1 | 1 |
| GOTERM_B<br>P_DIRECT | GO:0043433~negative regulation of sequence-specific DNA binding transcription factor activity | 7 | 0.548 | 0.195 | PRNP,<br>TNFSF4,<br>CEBPG,<br>RLIM,<br>FOXP3,<br>RNF2,<br>SMAD7 | 1096 | 60 | 16792 | 1.787 | 1 | 1 | 1 |

**Annotation Cluster 3 Enrichment Score: 1.0310210919726999**

| Category | Term | Count | % | PValue | Genes | List<br>Total | Pop<br>Hits | Pop<br>Total | Fold<br>Enrichment | Bonferroni | Benjamini | FDR |
|----------|------|-------|---|--------|-------|---------------|-------------|--------------|--------------------|------------|-----------|-----|
|----------|------|-------|---|--------|-------|---------------|-------------|--------------|--------------------|------------|-----------|-----|

---

|                      |                                                                     |   |       |       |                                                                              |      |    |       |       |   |   |   |
|----------------------|---------------------------------------------------------------------|---|-------|-------|------------------------------------------------------------------------------|------|----|-------|-------|---|---|---|
| GOTERM_B<br>P_DIRECT | GO:0050885~neuromuscular process controlling balance                | 8 | 0.626 | 0.028 | CNTNAP1,<br>NLGN2,<br>NR4A3,<br>DLG4,<br>GAA,<br>CACNA1A,<br>RAC3,<br>SHANK1 | 1096 | 46 | 16792 | 2.665 | 1 | 1 | 1 |
| GOTERM_B<br>P_DIRECT | GO:2000463~positive regulation of excitatory postsynaptic potential | 4 | 0.313 | 0.138 | NLGN3,<br>NLGN2,<br>DLG4,<br>SHANK1                                          | 1096 | 20 | 16792 | 3.064 | 1 | 1 | 1 |
| GOTERM_B<br>P_DIRECT | GO:0035418~protein localization to synapse                          | 3 | 0.235 | 0.206 | NLGN2,<br>DLG4,<br>SHANK1                                                    | 1096 | 13 | 16792 | 3.536 | 1 | 1 | 1 |

---

**Blood DEGs\_DAVID\_KEGG**

Appendix 1 to Pan S, Zhou Y, Yan L, et al. TGF- $\beta$ 1 is associated with deficits in cognition and cerebral cortical thickness in first-episode schizophrenia. *J Psychiatry Neurosci* 2022. doi: 10.1503/jpn.210121

Copyright © 2022 The Author(s) or their employer(s).

To receive this resource in an accessible format, please contact us at cmajgroup@cmaj.ca.

Online appendices are unedited and posted as supplied by the authors.

**Annotation Cluster 1 Enrichment Score: 2.818933485201748**

| Category     | Term                                  | Count | %     | PValue | Genes                                                                                                                                                                       | List Total | Pop Hits | Pop Total | Fold Enrichment | Bonferroni | Benjamini | FDR   |
|--------------|---------------------------------------|-------|-------|--------|-----------------------------------------------------------------------------------------------------------------------------------------------------------------------------|------------|----------|-----------|-----------------|------------|-----------|-------|
| KEGG_PATHWAY | hsa04062: Chemokine signaling pathway | 26    | 2.034 | 2.353  | SHC2, GSK3A, PXN, ADCY4, GNAI3, WAS, PIK3R3, CXCL1, CXCR6, PIK3CB, PIK3R1, RAP1B, CDC42, NRAS, RAP1A, GNGT2, GNG2, GNG5, CXCR3, GNG7, CCL4, PRKACB, CHUK, KRAS, CRK, NFKBIB | 434        | 186      | 6879      | 2.216           | 0.060      | 0.0311    | 0.029 |

Appendix 1 to Pan S, Zhou Y, Yan L, et al. TGF- $\beta$ 1 is associated with deficits in cognition and cerebral cortical thickness in first-episode schizophrenia. *J Psychiatry Neurosci* 2022. doi: 10.1503/jpn.210121

Copyright © 2022 The Author(s) or their employer(s).

To receive this resource in an accessible format, please contact us at [cmajgroup@cmaj.ca](mailto:cmajgroup@cmaj.ca).

Online appendices are unedited and posted as supplied by the authors.

|                      |                                           |    |       |       |                                                                                                                                                                                                                       |     |     |      |       |       |       |       |
|----------------------|-------------------------------------------|----|-------|-------|-----------------------------------------------------------------------------------------------------------------------------------------------------------------------------------------------------------------------|-----|-----|------|-------|-------|-------|-------|
| KEGG_<br>PATHW<br>AY | hsa04015:<br>Rap1<br>signaling<br>pathway | 26 | 2.034 | 0.001 | RALA, RGS14, CSF1,<br>ADCY4, GNAI3,<br>LPAR2, PIK3R3,<br>PIK3CB, PIK3R1,<br>RAP1B, CDC42,<br>NRAS, RAP1A,<br>PDGFD, P2RY1,<br>RAC3, PDGFRA,<br>PRKCI, F2R,<br>MAPK13, MRAS,<br>ADORA2A, KRAS,<br>PRKD2, CALM2,<br>CRK | 434 | 210 | 6879 | 1.962 | 0.318 | 0.041 | 0.038 |
|----------------------|-------------------------------------------|----|-------|-------|-----------------------------------------------------------------------------------------------------------------------------------------------------------------------------------------------------------------------|-----|-----|------|-------|-------|-------|-------|

|                      |                                                    |    |       |       |                                                                                                                                                                                                                                                                                                                                                                      |     |     |      |       |       |       |       |
|----------------------|----------------------------------------------------|----|-------|-------|----------------------------------------------------------------------------------------------------------------------------------------------------------------------------------------------------------------------------------------------------------------------------------------------------------------------------------------------------------------------|-----|-----|------|-------|-------|-------|-------|
| KEGG_<br>PATHW<br>AY | hsa04014:<br>Ras<br>signaling<br>pathway           | 27 | 2.112 | 0.002 | RALA, SHC2, CSF1,<br>PIK3R3, PIK3CB,<br>PIK3R1, ETS1,<br>RAP1B, CDC42,<br>NRAS, RAP1A,<br>GNGT2, GNG2,<br>SYNGAP1, GNG5,<br>GNG7, PDGFD,<br>RAC3, PRKACB,<br>PDGFRA, CHUK,<br>PLA2G4B, RRAS2,<br>PTPN11, MRAS,<br>KRAS, CALM2<br>SHC2, PIK3R3, FRS2,<br>PTPN11, PIK3CB,<br>PIK3R1, MAPK13,<br>CDC42, RAP1B,<br>NRAS, RAP1A,<br>KRAS, CALM2,<br>CRK, SH2B2,<br>NFKBIB | 434 | 226 | 6879 | 1.894 | 0.399 | 0.437 | 0.041 |
| KEGG_<br>PATHW<br>AY | hsa04722:<br>Neurotroph<br>in signaling<br>pathway | 16 | 1.252 | 0.008 |                                                                                                                                                                                                                                                                                                                                                                      | 434 | 120 | 6879 | 2.113 | 0.879 | 0.109 | 0.101 |

---

Appendix 1 to Pan S, Zhou Y, Yan L, et al. TGF- $\beta$ 1 is associated with deficits in cognition and cerebral cortical thickness in first-episode schizophrenia. *J Psychiatry Neurosci* 2022. doi: 10.1503/jpn.210121

Copyright © 2022 The Author(s) or their employer(s).

To receive this resource in an accessible format, please contact us at [cmajgroup@cmaj.ca](mailto:cmajgroup@cmaj.ca).

Online appendices are unedited and posted as supplied by the authors.

**Annotation Cluster 2    Enrichment Score: 1.7481231862999154**

---

| Category | Term | Count | % | PValue | Genes | List<br>Total | Pop<br>Hits | Pop<br>Total | Fold<br>Enrichment | Bonferroni | Benjamini | FDR |
|----------|------|-------|---|--------|-------|---------------|-------------|--------------|--------------------|------------|-----------|-----|
|----------|------|-------|---|--------|-------|---------------|-------------|--------------|--------------------|------------|-----------|-----|

---

---

|                      |                                               |    |       |       |                                                                                                                                                                                                                                                                                                              |     |     |      |       |       |       |       |
|----------------------|-----------------------------------------------|----|-------|-------|--------------------------------------------------------------------------------------------------------------------------------------------------------------------------------------------------------------------------------------------------------------------------------------------------------------|-----|-----|------|-------|-------|-------|-------|
| KEGG_<br>PATHW<br>AY | hsa04611:<br>Platelet<br>activation           | 19 | 1.487 | 0.001 | P2RY12, PRKCI,<br>ARHGEF12,<br>PLA2G4B, F2R,<br>ADCY4, GNAI3,<br>PIK3R3, PIK3CB,<br>PIK3R1, MAPK13,<br>GNA13, RAP1B,<br>PPP1CB, RAP1A,<br>P2RY1, PRKG2,<br>ARHGEF1, PRKACB<br>ATF2, GABBR1,<br>SHC2, ADCY4,<br>GNAI3, PIK3R3,<br>PIK3CB, PIK3R1,<br>MMP9, NRAS,<br>KRAS, CALM2,<br>PRKACB, HSPA1B,<br>HSPA1A | 434 | 130 | 6879 | 2.317 | 0.275 | 0.040 | 0.037 |
| KEGG_<br>PATHW<br>AY | hsa04915:<br>Estrogen<br>signaling<br>pathway | 15 | 1.737 | 0.003 | P2RY12, PRKCI,<br>ARHGEF12,<br>PLA2G4B, F2R,<br>ADCY4, GNAI3,<br>PIK3R3, PIK3CB,<br>PIK3R1, MAPK13,<br>GNA13, RAP1B,<br>PPP1CB, RAP1A,<br>P2RY1, PRKG2,<br>ARHGEF1, PRKACB<br>ATF2, GABBR1,<br>SHC2, ADCY4,<br>GNAI3, PIK3R3,<br>PIK3CB, PIK3R1,<br>MMP9, NRAS,<br>KRAS, CALM2,<br>PRKACB, HSPA1B,<br>HSPA1A | 434 | 99  | 6879 | 2.402 | 0.592 | 0.056 | 0.052 |

Appendix 1 to Pan S, Zhou Y, Yan L, et al. TGF- $\beta$ 1 is associated with deficits in cognition and cerebral cortical thickness in first-episode schizophrenia. *J Psychiatry Neurosci* 2022. doi: 10.1503/jpn.210121

Copyright © 2022 The Author(s) or their employer(s).

To receive this resource in an accessible format, please contact us at [cmajgroup@cmaj.ca](mailto:cmajgroup@cmaj.ca).

Online appendices are unedited and posted as supplied by the authors.

|                      |                                                                            |    |       |       |                                                                                                                       |     |     |      |       |       |       |       |
|----------------------|----------------------------------------------------------------------------|----|-------|-------|-----------------------------------------------------------------------------------------------------------------------|-----|-----|------|-------|-------|-------|-------|
| KEGG_<br>PATHW<br>AY | hsa04725:<br>Cholinergic<br>synapse                                        | 14 | 1.095 | 0.022 | ADCY4, GNAI3,<br>CACNA1A, PIK3R3,<br>PIK3CB, PIK3R1,<br>CACNA1F, NRAS,<br>GNGT2, GNG2,<br>GNG5, GNG7, KRAS,<br>PRKACB | 434 | 111 | 6879 | 1.999 | 0.997 | 0.215 | 0.201 |
| KEGG_<br>PATHW<br>AY | hsa04923:<br>Regulation<br>of lipolysis<br>in<br>adipocytes                | 9  | 0.704 | 0.023 | LIPE, ADCY4,<br>GNAI3, PIK3R3,<br>PRKG2, PIK3CB,<br>PIK3R1, PRKACB,<br>PNPLA2                                         | 434 | 56  | 6879 | 2.547 | 0.998 | 0.215 | 0.201 |
| KEGG_<br>PATHW<br>AY | hsa04750:<br>Inflammato<br>ry mediator<br>regulation<br>of TRP<br>channels | 11 | 0.861 | 0.088 | PPP1CB, PLA2G4B,<br>ADCY4, PIK3R3,<br>ALOX12, TRPV1,<br>PIK3CB, PIK3R1,<br>CALM2, PRKACB,<br>MAPK13                   | 434 | 98  | 6879 | 1.779 | 1     | 0.443 | 0.413 |
| KEGG_<br>PATHW<br>AY | hsa04914:<br>Progesteron<br>e-mediated<br>oocyte<br>maturation             | 9  | 0.704 | 0.180 | PLK1, ADCY4,<br>GNAI3, PIK3R3,<br>KRAS, PIK3CB,<br>PIK3R1, PRKACB,<br>MAPK13                                          | 434 | 87  | 6879 | 1.640 | 1     | 0.637 | 0.593 |

---



Appendix 1 to Pan S, Zhou Y, Yan L, et al. TGF- $\beta$ 1 is associated with deficits in cognition and cerebral cortical thickness in first-episode schizophrenia. *J Psychiatry Neurosci* 2022. doi: 10.1503/jpn.210121

Copyright © 2022 The Author(s) or their employer(s).

To receive this resource in an accessible format, please contact us at [cmajgroup@cmaj.ca](mailto:cmajgroup@cmaj.ca).

Online appendices are unedited and posted as supplied by the authors.

**Annotation Cluster 3    Enrichment Score: 1.3649656250338933**

| Category     | Term                             | Count | %     | PValue | Genes                                                                                                     | List Total | Pop Hits | Pop Total | Fold Enrichment | Bonferroni | Benjamini | FDR   |
|--------------|----------------------------------|-------|-------|--------|-----------------------------------------------------------------------------------------------------------|------------|----------|-----------|-----------------|------------|-----------|-------|
| KEGG_PATHWAY | hsa04370: VEGF signaling pathway | 13    | 1.017 | 3.425  | P2RY12, PRKCI, SHC2, SPHK2, PLA2G4B, PXN, NFATC2, PIK3R3, PIK3CB, PIK3R1, MAPK13, CDC42, NRAS, RAC3, KRAS | 434        | 130      | 6879      | 2.317           | 0.275      | 0.040     | 0.037 |
| KEGG_PATHWAY | hsa05210: Colorectal cancer      | 15    | 1.737 | 0.003  | ATF2, GABBR1, SHC2, ADCY4, GNAI3, PIK3R3, PIK3CB, PIK3R1, MMP9, NRAS, KRAS, CALM2, PRKACB, HSPA1B, HSPA1A | 434        | 99       | 6879      | 2.402           | 0.592      | 0.056     | 0.052 |

Appendix 1 to Pan S, Zhou Y, Yan L, et al. TGF- $\beta$ 1 is associated with deficits in cognition and cerebral cortical thickness in first-episode schizophrenia. *J Psychiatry Neurosci* 2022. doi: 10.1503/jpn.210121

Copyright © 2022 The Author(s) or their employer(s).

To receive this resource in an accessible format, please contact us at [cmajgroup@cmaj.ca](mailto:cmajgroup@cmaj.ca).

Online appendices are unedited and posted as supplied by the authors.

|                      |                                                                            |    |       |       |                                                                                                                       |     |     |      |       |       |       |       |
|----------------------|----------------------------------------------------------------------------|----|-------|-------|-----------------------------------------------------------------------------------------------------------------------|-----|-----|------|-------|-------|-------|-------|
| KEGG_<br>PATHW<br>AY | hsa04725:<br>Cholinergic<br>synapse                                        | 14 | 1.095 | 0.022 | ADCY4, GNAI3,<br>CACNA1A, PIK3R3,<br>PIK3CB, PIK3R1,<br>CACNA1F, NRAS,<br>GNGT2, GNG2,<br>GNG5, GNG7, KRAS,<br>PRKACB | 434 | 111 | 6879 | 1.999 | 0.997 | 0.215 | 0.201 |
| KEGG_<br>PATHW<br>AY | hsa04923:<br>Regulation<br>of lipolysis<br>in<br>adipocytes                | 9  | 0.704 | 0.023 | LIPE, ADCY4,<br>GNAI3, PIK3R3,<br>PRKG2, PIK3CB,<br>PIK3R1, PRKACB,<br>PNPLA2                                         | 434 | 56  | 6879 | 2.547 | 0.998 | 0.215 | 0.201 |
| KEGG_<br>PATHW<br>AY | hsa04750:<br>Inflammato<br>ry mediator<br>regulation<br>of TRP<br>channels | 11 | 0.861 | 0.088 | PPP1CB, PLA2G4B,<br>ADCY4, PIK3R3,<br>ALOX12, TRPV1,<br>PIK3CB, PIK3R1,<br>CALM2, PRKACB,<br>MAPK13                   | 434 | 98  | 6879 | 1.779 | 1     | 0.443 | 0.413 |
| KEGG_<br>PATHW<br>AY | hsa04914:<br>Progesteron<br>e-mediated<br>oocyte<br>maturation             | 9  | 0.704 | 0.180 | PLK1, ADCY4,<br>GNAI3, PIK3R3,<br>KRAS, PIK3CB,<br>PIK3R1, PRKACB,<br>MAPK13                                          | 434 | 87  | 6879 | 1.640 | 1     | 0.637 | 0.593 |

---

Appendix 1 to Pan S, Zhou Y, Yan L, et al. TGF- $\beta$ 1 is associated with deficits in cognition and cerebral cortical thickness in first-episode schizophrenia. *J Psychiatry Neurosci* 2022. doi: 10.1503/jpn.210121

Copyright © 2022 The Author(s) or their employer(s).

To receive this resource in an accessible format, please contact us at [cmajgroup@cmaj.ca](mailto:cmajgroup@cmaj.ca).

Online appendices are unedited and posted as supplied by the authors.

**Table S3. TGF $\beta$  family blood RNAseq analysis**

| <b>EntrezID</b> | <b>logFC</b> | <b>AveExpr</b> | <b>t</b> | <b>P.Value</b> | <b>adj.P.Val</b> | <b>B</b> | <b>Symbols</b> | <b>Name</b>                                                                    |
|-----------------|--------------|----------------|----------|----------------|------------------|----------|----------------|--------------------------------------------------------------------------------|
| 7046            | -0.244       | 5.389          | -3.345   | 0.0011         | 0.019            | -1.023   | TGFBR1         | <b>transforming growth factor beta receptor 1</b>                              |
| 7049            | -0.452       | 4.317          | -4.028   | 9.90E-05       | 0.004            | 1.151    | TGFBR3         | <b>transforming growth factor beta receptor 3</b>                              |
| 7040            | 0.245        | 10.341         | 3.201    | 0.0017         | 0.026            | -1.438   | TGFB1          | <b>transforming growth factor beta 1<br/>sterol regulatory element binding</b> |
| 6720            | 0.231        | 6.504          | 3.609    | 0.0005         | 0.011            | -0.221   | SREBF1         | <b>transcription factor 1</b>                                                  |
| 5829            | 0.210        | 8.401          | 3.118    | 0.0023         | 0.031            | -1.671   | PXN            | <b>paxillin</b>                                                                |
| 1435            | 0.236        | 4.636          | 3.015    | 0.0031         | 0.038            | -1.953   | CSF1           | <b>colony stimulating factor 1</b>                                             |
| 2022            | 0.185        | 5.142          | 2.939    | 0.0040         | 0.044            | -2.157   | ENG            | <b>endoglin</b>                                                                |

Appendix 1 to Pan S, Zhou Y, Yan L, et al. TGF- $\beta$ 1 is associated with deficits in cognition and cerebral cortical thickness in first-episode schizophrenia. *J Psychiatry Neurosci* 2022. doi: 10.1503/jpn.210121

Copyright © 2022 The Author(s) or their employer(s).

To receive this resource in an accessible format, please contact us at [cmajgroup@cmaj.ca](mailto:cmajgroup@cmaj.ca).

Online appendices are unedited and posted as supplied by the authors.

**Table S4.TGF $\beta$  family\_blood RNAseq counts**

| #NAME | ENG | TGFB1 | TGFBR1 | TGFBR3 |
|-------|-----|-------|--------|--------|
| HC_21 | 803 | 24607 | 675    | 669    |
| HC_25 | 835 | 23546 | 962    | 962    |
| HC_77 | 861 | 24331 | 601    | 369    |
| HC_78 | 464 | 18795 | 513    | 277    |
| HC_80 | 776 | 24927 | 620    | 467    |
| HC_81 | 756 | 24765 | 884    | 775    |
| HC_87 | 544 | 14365 | 1210   | 620    |
| HC_88 | 534 | 22507 | 735    | 303    |
| HC_89 | 624 | 21973 | 979    | 690    |
| HC_90 | 893 | 20522 | 868    | 612    |
| HC_95 | 578 | 15703 | 331    | 241    |

|               |     |       |      |     |
|---------------|-----|-------|------|-----|
| <b>HC_96</b>  | 792 | 21723 | 851  | 439 |
| <b>HC_97</b>  | 759 | 16943 | 1107 | 794 |
| <b>HC_109</b> | 370 | 9966  | 498  | 279 |
| <b>HC_110</b> | 667 | 17411 | 1142 | 373 |
| <b>HC_111</b> | 345 | 14743 | 376  | 238 |
| <b>HC_118</b> | 336 | 10249 | 486  | 211 |
| <b>HC_125</b> | 318 | 9308  | 934  | 616 |
| <b>HC_127</b> | 188 | 9592  | 570  | 178 |
| <b>HC_135</b> | 587 | 20133 | 963  | 585 |
| <b>HC_157</b> | 646 | 18888 | 991  | 549 |
| <b>HC_161</b> | 447 | 16158 | 323  | 224 |
| <b>HC_162</b> | 609 | 22010 | 848  | 427 |
| <b>HC_163</b> | 565 | 17019 | 910  | 521 |
| <b>HC_164</b> | 821 | 17580 | 968  | 548 |
| <b>HC_166</b> | 468 | 16543 | 1303 | 721 |
| <b>HC_179</b> | 721 | 22615 | 1077 | 417 |
| <b>HC_180</b> | 568 | 23319 | 900  | 322 |
| <b>HC_182</b> | 778 | 27061 | 774  | 254 |
| <b>HC_222</b> | 541 | 22748 | 651  | 336 |
| <b>HC_225</b> | 459 | 22045 | 734  | 407 |
| <b>HC_244</b> | 313 | 17153 | 449  | 245 |
| <b>HC_245</b> | 453 | 21800 | 831  | 338 |
| <b>HC_249</b> | 489 | 26089 | 711  | 274 |
| <b>HC_251</b> | 409 | 24336 | 631  | 339 |

|               |      |       |      |     |
|---------------|------|-------|------|-----|
| <b>HC_252</b> | 416  | 22698 | 633  | 304 |
| <b>HC_22</b>  | 580  | 16361 | 1070 | 577 |
| <b>HC_112</b> | 420  | 19873 | 680  | 246 |
| <b>HC_117</b> | 268  | 18955 | 535  | 223 |
| <b>HC_126</b> | 505  | 18428 | 857  | 183 |
| <b>HC_128</b> | 561  | 16563 | 1001 | 613 |
| <b>HC_136</b> | 580  | 24105 | 853  | 500 |
| <b>HC_159</b> | 422  | 19621 | 1033 | 319 |
| <b>HC_171</b> | 263  | 12054 | 548  | 249 |
| <b>FS_30</b>  | 722  | 17000 | 1050 | 466 |
| <b>FS_31</b>  | 1119 | 22436 | 848  | 431 |
| <b>FS_35</b>  | 775  | 18267 | 1064 | 572 |
| <b>FS_36</b>  | 620  | 18249 | 1303 | 410 |
| <b>FS_37</b>  | 646  | 19723 | 937  | 253 |
| <b>FS_38</b>  | 850  | 24650 | 506  | 386 |
| <b>FS_40</b>  | 846  | 18313 | 973  | 545 |
| <b>FS_61</b>  | 607  | 31481 | 410  | 178 |
| <b>FS_62</b>  | 947  | 29833 | 642  | 524 |
| <b>FS_64</b>  | 908  | 26096 | 542  | 255 |
| <b>FS_65</b>  | 994  | 34146 | 488  | 263 |
| <b>FS_66</b>  | 944  | 35517 | 680  | 399 |
| <b>FS_67</b>  | 1031 | 30086 | 694  | 560 |
| <b>FS_68</b>  | 668  | 31235 | 479  | 290 |
| <b>FS_70</b>  | 432  | 11813 | 323  | 91  |

|               |     |       |      |     |
|---------------|-----|-------|------|-----|
| <b>FS_71</b>  | 365 | 11608 | 179  | 144 |
| <b>FS_72</b>  | 731 | 26075 | 782  | 463 |
| <b>FS_73</b>  | 593 | 29247 | 519  | 194 |
| <b>FS_75</b>  | 840 | 27838 | 441  | 248 |
| <b>FS_76</b>  | 545 | 29936 | 383  | 92  |
| <b>FS_82</b>  | 710 | 23525 | 1025 | 428 |
| <b>FS_84</b>  | 339 | 19946 | 825  | 65  |
| <b>FS_85</b>  | 552 | 23583 | 789  | 312 |
| <b>FS_86</b>  | 632 | 31426 | 668  | 301 |
| <b>FS_91</b>  | 652 | 19354 | 1079 | 805 |
| <b>FS_92</b>  | 949 | 24551 | 887  | 579 |
| <b>FS_93</b>  | 689 | 19996 | 984  | 327 |
| <b>FS_100</b> | 247 | 13408 | 619  | 196 |
| <b>FS_101</b> | 401 | 9214  | 670  | 457 |
| <b>FS_102</b> | 383 | 12521 | 391  | 219 |
| <b>FS_108</b> | 315 | 9246  | 364  | 82  |
| <b>FS_114</b> | 227 | 10482 | 603  | 182 |
| <b>FS_115</b> | 297 | 13862 | 400  | 178 |
| <b>FS_129</b> | 625 | 18821 | 795  | 293 |
| <b>FS_131</b> | 620 | 18101 | 1238 | 658 |
| <b>FS_132</b> | 584 | 17818 | 907  | 441 |
| <b>FS_133</b> | 459 | 23118 | 340  | 63  |
| <b>FS_134</b> | 280 | 17438 | 253  | 113 |
| <b>FS_139</b> | 575 | 22948 | 764  | 445 |

|               |     |       |      |     |
|---------------|-----|-------|------|-----|
| <b>FS_141</b> | 563 | 23468 | 599  | 217 |
| <b>FS_142</b> | 523 | 19485 | 659  | 336 |
| <b>FS_147</b> | 294 | 19090 | 813  | 303 |
| <b>FS_149</b> | 722 | 24331 | 583  | 314 |
| <b>FS_150</b> | 577 | 20331 | 623  | 131 |
| <b>FS_152</b> | 582 | 27540 | 681  | 325 |
| <b>FS_153</b> | 541 | 17300 | 834  | 420 |
| <b>FS_154</b> | 763 | 23904 | 820  | 268 |
| <b>FS_156</b> | 816 | 18616 | 853  | 397 |
| <b>FS_168</b> | 691 | 20481 | 1113 | 460 |
| <b>FS_170</b> | 911 | 19705 | 1019 | 476 |
| <b>FS_173</b> | 868 | 28303 | 729  | 297 |
| <b>FS_174</b> | 475 | 20478 | 739  | 210 |
| <b>FS_178</b> | 678 | 16652 | 1524 | 986 |
| <b>FS_187</b> | 393 | 18014 | 483  | 239 |
| <b>FS_188</b> | 749 | 25487 | 625  | 271 |
| <b>FS_191</b> | 584 | 34241 | 218  | 108 |
| <b>FS_193</b> | 348 | 20202 | 450  | 148 |
| <b>FS_194</b> | 615 | 31321 | 597  | 264 |
| <b>FS_195</b> | 744 | 30153 | 542  | 372 |
| <b>FS_196</b> | 700 | 31067 | 402  | 275 |
| <b>FS_200</b> | 473 | 26136 | 568  | 277 |
| <b>FS_201</b> | 528 | 30040 | 658  | 585 |
| <b>FS_204</b> | 368 | 24989 | 367  | 93  |



Appendix 1 to Pan S, Zhou Y, Yan L, et al. TGF- $\beta$ 1 is associated with deficits in cognition and cerebral cortical thickness in first-episode schizophrenia. *J Psychiatry Neurosci* 2022. doi: 10.1503/jpn.210121

Copyright © 2022 The Author(s) or their employer(s).

To receive this resource in an accessible format, please contact us at cmajgroup@cmaj.ca.

Online appendices are unedited and posted as supplied by the authors.

|               |     |       |     |     |
|---------------|-----|-------|-----|-----|
| <b>FS_216</b> | 200 | 6746  | 290 | 116 |
| <b>FS_229</b> | 348 | 15655 | 319 | 94  |
| <b>FS_230</b> | 607 | 25549 | 562 | 305 |
| <b>FS_231</b> | 705 | 21994 | 548 | 365 |
| <b>FS_232</b> | 652 | 31424 | 441 | 284 |
| <b>FS_233</b> | 592 | 25558 | 734 | 498 |
| <b>FS_234</b> | 461 | 29425 | 651 | 346 |
| <b>FS_236</b> | 971 | 25954 | 532 | 164 |
| <b>FS_237</b> | 371 | 17523 | 364 | 114 |
| <b>FS_213</b> | 680 | 28134 | 527 | 305 |
| <b>FS_214</b> | 529 | 22145 | 651 | 355 |
| <b>FS_215</b> | 560 | 22590 | 653 | 565 |

**Table S5. CMC\_DLPCFC WGCNA\_TGF $\beta$ 1 coexpressed\_Gene list**

| <b>ID</b> | <b>clustering method</b> | <b>cluster number</b> | <b>cluster color</b> | <b>gene count</b> | <b>protein name</b> |
|-----------|--------------------------|-----------------------|----------------------|-------------------|---------------------|
| CTR       | kmeans                   | 2                     | Green                | 26                | SREBF1              |

Appendix 1 to Pan S, Zhou Y, Yan L, et al. TGF- $\beta$ 1 is associated with deficits in cognition and cerebral cortical thickness in first-episode schizophrenia. *J Psychiatry Neurosci* 2022. doi: 10.1503/jpn.210121

Copyright © 2022 The Author(s) or their employer(s).

To receive this resource in an accessible format, please contact us at [cmajgroup@cmaj.ca](mailto:cmajgroup@cmaj.ca).

Online appendices are unedited and posted as supplied by the authors.

|     |        |   |       |    |          |
|-----|--------|---|-------|----|----------|
| CTR | kmeans | 2 | Green | 26 | TGFB1    |
| CTR | kmeans | 2 | Green | 26 | PDGFRB   |
| CTR | kmeans | 2 | Green | 26 | NTN1     |
| CTR | kmeans | 2 | Green | 26 | MAPKAPK2 |
| CTR | kmeans | 2 | Green | 26 | MOV10    |
| CTR | kmeans | 2 | Green | 26 | RNF43    |
| CTR | kmeans | 2 | Green | 26 | AGT      |
| CTR | kmeans | 2 | Green | 26 | ERBB2    |
| CTR | kmeans | 2 | Green | 26 | FGFR3    |
| CTR | kmeans | 2 | Green | 26 | CSF1     |
| CTR | kmeans | 2 | Green | 26 | PTBP1    |
| CTR | kmeans | 2 | Green | 26 | ZFHX3    |
| CTR | kmeans | 2 | Green | 26 | UCP2     |
| CTR | kmeans | 2 | Green | 26 | CABLES1  |
| CTR | kmeans | 2 | Green | 26 | ITPKB    |
| CTR | kmeans | 2 | Green | 26 | NFATC1   |
| CTR | kmeans | 2 | Green | 26 | SOD3     |
| CTR | kmeans | 2 | Green | 26 | LATS2    |
| CTR | kmeans | 2 | Green | 26 | NOTCH1   |
| CTR | kmeans | 2 | Green | 26 | AXL      |
| CTR | kmeans | 2 | Green | 26 | GLI3     |
| CTR | kmeans | 2 | Green | 26 | H6PD     |
| CTR | kmeans | 2 | Green | 26 | EHMT1    |
| CTR | kmeans | 2 | Green | 26 | NOTCH3   |

Appendix 1 to Pan S, Zhou Y, Yan L, et al. TGF- $\beta$ 1 is associated with deficits in cognition and cerebral cortical thickness in first-episode schizophrenia. *J Psychiatry Neurosci* 2022. doi: 10.1503/jpn.210121

Copyright © 2022 The Author(s) or their employer(s).

To receive this resource in an accessible format, please contact us at [cmajgroup@cmaj.ca](mailto:cmajgroup@cmaj.ca).

Online appendices are unedited and posted as supplied by the authors.

|     |        |   |           |    |       |
|-----|--------|---|-----------|----|-------|
| CTR | kmeans | 2 | Green     | 26 | TP53  |
| SCZ | kmeans | 3 | Dark Cyan | 14 | BCAN  |
| SCZ | kmeans | 3 | Dark Cyan | 14 | TGFB1 |
| SCZ | kmeans | 3 | Dark Cyan | 14 | FN1   |
| SCZ | kmeans | 3 | Dark Cyan | 14 | TLN1  |
| SCZ | kmeans | 3 | Dark Cyan | 14 | WFS1  |
| SCZ | kmeans | 3 | Dark Cyan | 14 | ITGA7 |
| SCZ | kmeans | 3 | Dark Cyan | 14 | LAMB2 |
| SCZ | kmeans | 3 | Dark Cyan | 14 | BGN   |
| SCZ | kmeans | 3 | Dark Cyan | 14 | FBLN1 |
| SCZ | kmeans | 3 | Dark Cyan | 14 | AXL   |
| SCZ | kmeans | 3 | Dark Cyan | 14 | PXN   |
| SCZ | kmeans | 3 | Dark Cyan | 14 | HSPG2 |
| SCZ | kmeans | 3 | Dark Cyan | 14 | NCAN  |
| SCZ | kmeans | 3 | Dark Cyan | 14 | CSF1  |

---

**Table S6. CMC\_DLPFC WGCNA\_TGF $\beta$ 1 coexpressed\_CTR\_enrichment.Process\_cluster\_FDR > 10e-5**

| #term ID   | term description                             | observed gene count | background gene count | false discovery rate | matching proteins in your network (labels)                                                                                          |
|------------|----------------------------------------------|---------------------|-----------------------|----------------------|-------------------------------------------------------------------------------------------------------------------------------------|
| GO:0007166 | cell surface receptor signaling pathway      | 18                  | 2198                  | 1.37E-08             | AGT,AXL,CSF1,ERBB2,FGFR3,GLI3,ITPKB,MAPKAPK2,MOV10,NFATC1,NOTCH1,NOTCH3,PDGFRB,PTBP1,RNF43,SREBF1,TGFB1,TP53                        |
| GO:0050793 | regulation of developmental process          | 18                  | 2416                  | 3.39E-08             | AGT,AXL,CSF1,EHMT1,ERBB2,FGFR3,GLI3,ITPKB,LATS2,MOV10,NFATC1,NOTCH1,NOTCH3,NTN1,PDGFRB,PTBP1,TGFB1,ZFHX3                            |
| GO:0008283 | cell population proliferation                | 11                  | 676                   | 3.17E-07             | AGT,CSF1,ERBB2,FGFR3,GLI3,ITPKB,NOTCH1,PDGFRB,RNF43,TGFB1,TP53                                                                      |
| GO:0010646 | regulation of cell communication             | 19                  | 3327                  | 3.17E-07             | AGT,AXL,CSF1,ERBB2,FGFR3,GLI3,ITPKB,LATS2,MAPKAPK2,NFATC1,NOTCH1,NOTCH3,PDGFRB,PTBP1,RNF43,SREBF1,TGFB1,TP53,UCP2                   |
| GO:0023051 | regulation of signaling                      | 19                  | 3360                  | 3.17E-07             | AGT,AXL,CSF1,ERBB2,FGFR3,GLI3,ITPKB,LATS2,MAPKAPK2,NFATC1,NOTCH1,NOTCH3,PDGFRB,PTBP1,RNF43,SREBF1,TGFB1,TP53,UCP2                   |
| GO:0048519 | negative regulation of biological process    | 22                  | 4953                  | 3.17E-07             | AGT,AXL,EHMT1,ERBB2,FGFR3,GLI3,ITPKB,LATS2,MAPKAPK2,MOV10,NFATC1,NOTCH1,NOTCH3,NTN1,PDGFRB,PTBP1,RNF43,SREBF1,TGFB1,TP53,UCP2,ZFHX3 |
| GO:0051093 | negative regulation of developmental process | 12                  | 910                   | 3.17E-07             | AGT,ERBB2,FGFR3,GLI3,ITPKB,NFATC1,NOTCH1,NOTCH3,NTN1,PTBP1,TGFB1,ZFHX3                                                              |

|            |                                                                  |    |      |          |                                                                                                                          |
|------------|------------------------------------------------------------------|----|------|----------|--------------------------------------------------------------------------------------------------------------------------|
| GO:1902533 | positive regulation of intracellular signal transduction         | 12 | 959  | 3.24E-07 | AGT,AXL,CSF1,ERBB2,FGFR3,ITPKB,MAPKAPK2,NOTCH1,PDGFRB,PTBP1,TGFB1,TP53                                                   |
| GO:0042221 | response to chemical                                             | 20 | 4153 | 5.87E-07 | AGT,AXL,CSF1,EHMT1,ERBB2,FGFR3,GLI3,ITPKB,LATS2,MAPKAPK2,NOTCH1,NTN1,PDGFRB,PTBP1,SOD3,SREBF1,TGFB1,TP53,UCP2,ZFH X3     |
| GO:0051239 | regulation of multicellular organismal process                   | 17 | 2788 | 9.09E-07 | AGT,AXL,CSF1,EHMT1,ERBB2,GLI3,ITPKB,LATS2,MAPKAPK2,MOV10,NFATC1,NOTCH1,NOTCH3,NTN1,PDGFRB,SREBF1,TGFB1                   |
| GO:0045595 | regulation of cell differentiation                               | 14 | 1695 | 1.12E-06 | AGT,AXL,CSF1,ERBB2,GLI3,ITPKB,MOV10,NFATC1,NOTCH1,NOTCH3,NTN1,PTBP1,TGFB1,ZFH X3                                         |
| GO:0048523 | negative regulation of cellular process                          | 20 | 4454 | 1.59E-06 | AGT,AXL,EHMT1,ERBB2,GLI3,ITPKB,LATS2,MAPKAPK2,NFATC1,NOTCH1,NOTCH3,NTN1,PDGFRB,PTBP1,RNF43,SREBF1,TGFB1,TP53,UCP2,ZFH X3 |
| GO:0045596 | negative regulation of cell differentiation                      | 10 | 683  | 1.75E-06 | ERBB2,GLI3,ITPKB,NFATC1,NOTCH1,NOTCH3,NTN1,PTBP1,TGFB1,ZFH X3                                                            |
| GO:0007169 | transmembrane receptor protein tyrosine kinase signaling pathway | 9  | 499  | 1.85E-06 | AXL,CSF1,ERBB2,FGFR3,MAPKAPK2,PDGFRB,PTBP1,SREBF1,TGFB1                                                                  |

Appendix 1 to Pan S, Zhou Y, Yan L, et al. TGF- $\beta$ 1 is associated with deficits in cognition and cerebral cortical thickness in first-episode schizophrenia. *J Psychiatry Neurosci* 2022. doi: 10.1503/jpn.210121

Copyright © 2022 The Author(s) or their employer(s).

To receive this resource in an accessible format, please contact us at [cmajgroup@cmaj.ca](mailto:cmajgroup@cmaj.ca).

Online appendices are unedited and posted as supplied by the authors.

|            |                                                    |    |      |          |                                                                                                                                              |
|------------|----------------------------------------------------|----|------|----------|----------------------------------------------------------------------------------------------------------------------------------------------|
| GO:0007154 | cell communication                                 | 21 | 5219 | 2.23E-06 | AGT,AXL,CSF1,ERBB2,FGFR3,GLI3,ITPKB,LATS2,MAPKAPK2,MOV10,NFATC1,NOTCH1,NOTCH3,NTN1,PDGFRB,PTBP1,RNF43,SREBF1,TGFB1,TP53,UCP2                 |
| GO:0009966 | regulation of signal transduction                  | 17 | 3033 | 2.23E-06 | AGT,AXL,CSF1,ERBB2,FGFR3,GLI3,ITPKB,LATS2,MAPKAPK2,NFATC1,NOTCH1,NOTCH3,PDGFRB,PTBP1,RNF43,TGFB1,TP53                                        |
| GO:2000026 | regulation of multicellular organismal development | 14 | 1876 | 2.67E-06 | AGT,AXL,CSF1,EHMT1,ERBB2,GLI3,ITPKB,MOV10,NFATC1,NOTCH1,NOTCH3,NTN1,PDGFRB,TGFB1                                                             |
| GO:0070887 | cellular response to chemical stimulus             | 16 | 2672 | 2.83E-06 | AGT,AXL,CSF1,ERBB2,FGFR3,ITPKB,LATS2,MAPKAPK2,NOTCH1,PDGFRB,PTBP1,SOD3,SREBF1,TGFB1,TP53,UCP2                                                |
| GO:0007165 | signal transduction                                | 20 | 4738 | 3.10E-06 | AGT,AXL,CSF1,ERBB2,FGFR3,GLI3,ITPKB,LATS2,MAPKAPK2,MOV10,NFATC1,NOTCH1,NOTCH3,NTN1,PDGFRB,PTBP1,RNF43,SREBF1,TGFB1,TP53                      |
| GO:0050896 | response to stimulus                               | 24 | 7824 | 4.38E-06 | AGT,AXL,CSF1,EHMT1,ERBB2,FGFR3,GLI3,ITPKB,LATS2,MAPKAPK2,MOV10,NFATC1,NOTCH1,NOTCH3,NTN1,PDGFRB,PTBP1,RNF43,SOD3,SREBF1,TGFB1,TP53,UCP2,ZFH3 |

Appendix 1 to Pan S, Zhou Y, Yan L, et al. TGF- $\beta$ 1 is associated with deficits in cognition and cerebral cortical thickness in first-episode schizophrenia. *J Psychiatry Neurosci* 2022. doi: 10.1503/jpn.210121

Copyright © 2022 The Author(s) or their employer(s).

To receive this resource in an accessible format, please contact us at cmajgroup@cmaj.ca.

Online appendices are unedited and posted as supplied by the authors.

|            |                                            |    |      |          |                                                                                                                                   |
|------------|--------------------------------------------|----|------|----------|-----------------------------------------------------------------------------------------------------------------------------------|
| GO:0051716 | cellular response to stimulus              | 22 | 6212 | 4.67E-06 | AGT,AXL,CSF1,ERBB2,FGFR3,GLI3,ITPKB,LATS2,MAPKAPK2,MOV10,NFATC1,NOTCH1,NOTCH3,NTN1,PDGFRB,PTBP1,RNF43,SOD3,SREBF1,TGFB1,TP53,UCP2 |
| GO:0048522 | positive regulation of cellular process    | 20 | 4898 | 4.89E-06 | AGT,AXL,CSF1,ERBB2,FGFR3,GLI3,ITPKB,LATS2,MAPKAPK2,NFATC1,NOTCH1,NOTCH3,NTN1,PDGFRB,PTBP1,SREBF1,TGFB1,TP53,UCP2,ZFH3             |
| GO:0009719 | response to endogenous stimulus            | 12 | 1353 | 5.03E-06 | AGT,ERBB2,FGFR3,LATS2,NOTCH1,PDGFRB,PTBP1,SREBF1,TGFB1,TP53,UCP2,ZFH3                                                             |
| GO:1903706 | regulation of hemopoiesis                  | 8  | 412  | 5.03E-06 | AXL,CSF1,ERBB2,GLI3,ITPKB,MOV10,NOTCH1,TGFB1                                                                                      |
| GO:0048583 | regulation of response to stimulus         | 18 | 3882 | 6.86E-06 | AGT,AXL,CSF1,ERBB2,FGFR3,GLI3,ITPKB,LATS2,MAPKAPK2,NFATC1,NOTCH1,NOTCH3,PDGFRB,PTBP1,RNF43,TGFB1,TP53,UCP2                        |
| GO:0071495 | cellular response to endogenous stimulus   | 11 | 1106 | 6.86E-06 | AGT,ERBB2,FGFR3,LATS2,NOTCH1,PDGFRB,PTBP1,SREBF1,TGFB1,TP53,UCP2                                                                  |
| GO:0048513 | animal organ development                   | 16 | 2926 | 6.97E-06 | AGT,AXL,CSF1,ERBB2,FGFR3,GLI3,ITPKB,MAPKAPK2,NOTCH1,NOTCH3,NTN1,PDGFRB,SREBF1,TGFB1,UCP2,ZFH3                                     |
| GO:0031100 | animal organ regeneration                  | 5  | 79   | 7.00E-06 | AXL,GLI3,NOTCH1,TGFB1,UCP2                                                                                                        |
| GO:0031399 | regulation of protein modification process | 13 | 1747 | 7.00E-06 | AGT,CSF1,ERBB2,FGFR3,ITPKB,LATS2,MAPKAPK2,NOTCH1,PDGFRB,PTBP1,SREBF1,TGFB1,TP53                                                   |

Appendix 1 to Pan S, Zhou Y, Yan L, et al. TGF- $\beta$ 1 is associated with deficits in cognition and cerebral cortical thickness in first-episode schizophrenia. *J Psychiatry Neurosci* 2022. doi: 10.1503/jpn.210121

Copyright © 2022 The Author(s) or their employer(s).

To receive this resource in an accessible format, please contact us at cmajgroup@cmaj.ca.

Online appendices are unedited and posted as supplied by the authors.

|            |                                                      |    |      |          |                                                                                    |
|------------|------------------------------------------------------|----|------|----------|------------------------------------------------------------------------------------|
| GO:0008284 | positive regulation of cell population proliferation | 10 | 878  | 7.65E-06 | AGT,CSF1,ERBB2,FGFR3,GLI3,NOTCH1,NOTCH3,NTN1,PDGFRB,TGFB1                          |
| GO:0031401 | positive regulation of protein modification process  | 11 | 1149 | 7.88E-06 | AGT,CSF1,ERBB2,FGFR3,MAPKAPK2,NOTCH1,PDGFRB,PTBP1,SREBF1,TGFB1,TP53                |
| GO:0040008 | regulation of growth                                 | 9  | 663  | 8.70E-06 | AGT,CSF1,ERBB2,FGFR3,LATS2,NOTCH1,NTN1,TGFB1,TP53                                  |
| GO:0048839 | inner ear development                                | 6  | 177  | 8.83E-06 | GLI3,MAPKAPK2,NOTCH1,NTN1,PDGFRB,TGFB1                                             |
| GO:0071310 | cellular response to organic substance               | 14 | 2219 | 1.05E-05 | AGT,AXL,CSF1,ERBB2,FGFR3,LATS2,MAPKAPK2,NOTCH1,PDGFRB,PTBP1,SREBF1,TGFB1,TP53,UCP2 |
| GO:0000165 | MAPK cascade                                         | 7  | 323  | 1.19E-05 | AGT,ERBB2,FGFR3,ITPKB,MAPKAPK2,PDGFRB,TGFB1                                        |
| GO:0022612 | gland morphogenesis                                  | 5  | 94   | 1.19E-05 | CSF1,GLI3,NOTCH1,NTN1,TGFB1                                                        |
| GO:0035556 | intracellular signal transduction                    | 12 | 1528 | 1.19E-05 | AGT,AXL,ERBB2,FGFR3,ITPKB,LATS2,MAPKAPK2,NFATC1,NTN1,PDGFRB,TGFB1,TP53             |
| GO:0070848 | response to growth factor                            | 8  | 507  | 1.35E-05 | ERBB2,FGFR3,MAPKAPK2,NOTCH1,PDGFRB,PTBP1,TGFB1,ZFH3                                |
| GO:0010648 | negative regulation of cell communication            | 11 | 1255 | 1.46E-05 | AGT,ERBB2,GLI3,LATS2,NFATC1,NOTCH1,NOTCH3,RNF43,SREBF1,TGFB1,UCP2                  |
| GO:0023057 | negative regulation of signaling                     | 11 | 1258 | 1.46E-05 | AGT,ERBB2,GLI3,LATS2,NFATC1,NOTCH1,NOTCH3,RNF43,SREBF1,TGFB1,UCP2                  |
| GO:0048589 | developmental growth                                 | 7  | 340  | 1.46E-05 | AGT,CSF1,FGFR3,GLI3,NOTCH1,PDGFRB,TGFB1                                            |



Appendix 1 to Pan S, Zhou Y, Yan L, et al. TGF- $\beta$ 1 is associated with deficits in cognition and cerebral cortical thickness in first-episode schizophrenia. *J Psychiatry Neurosci* 2022. doi: 10.1503/jpn.210121

Copyright © 2022 The Author(s) or their employer(s).

To receive this resource in an accessible format, please contact us at [cmajgroup@cmaj.ca](mailto:cmajgroup@cmaj.ca).

Online appendices are unedited and posted as supplied by the authors.

|            |                                                            |    |      |          |                                                                                                           |
|------------|------------------------------------------------------------|----|------|----------|-----------------------------------------------------------------------------------------------------------|
| GO:0060443 | mammary gland morphogenesis                                | 4  | 41   | 1.81E-05 | CSF1, GLI3, NTN1, TGFB1                                                                                   |
| GO:0010033 | response to organic substance                              | 15 | 2815 | 1.86E-05 | AGT, AXL, CSF1, ERBB2, FGFR3, LATS2, MAPKAPK2, NOTCH1, PDGFRB, PTBP1, SREBF1, TGFB1, TP53, UCP2, ZFH3     |
| GO:0019220 | regulation of phosphate metabolic process                  | 12 | 1657 | 2.05E-05 | AGT, CSF1, ERBB2, FGFR3, ITPKB, LATS2, MAPKAPK2, NOTCH1, PDGFRB, PTBP1, TGFB1, TP53                       |
| GO:1901201 | regulation of extracellular matrix assembly                | 3  | 9    | 2.05E-05 | AGT, NOTCH1, TGFB1                                                                                        |
| GO:0045937 | positive regulation of phosphate metabolic process         | 10 | 1052 | 2.23E-05 | AGT, CSF1, ERBB2, FGFR3, MAPKAPK2, NOTCH1, PDGFRB, PTBP1, TGFB1, TP53                                     |
| GO:0001932 | regulation of protein phosphorylation                      | 11 | 1370 | 2.53E-05 | AGT, CSF1, ERBB2, FGFR3, ITPKB, LATS2, MAPKAPK2, NOTCH1, PDGFRB, TGFB1, TP53                              |
| GO:0045926 | negative regulation of growth                              | 6  | 235  | 2.57E-05 | AGT, FGFR3, NOTCH1, NTN1, TGFB1, TP53                                                                     |
| GO:0046579 | positive regulation of Ras protein signal transduction     | 4  | 49   | 2.83E-05 | CSF1, ITPKB, NOTCH1, PDGFRB                                                                               |
| GO:0051173 | positive regulation of nitrogen compound metabolic process | 15 | 2946 | 2.83E-05 | AGT, CSF1, ERBB2, FGFR3, GLI3, MAPKAPK2, NFATC1, NOTCH1, NOTCH3, PDGFRB, PTBP1, SREBF1, TGFB1, TP53, ZFH3 |
| GO:0051241 | negative regulation of multicellular organismal process    | 10 | 1098 | 2.98E-05 | AGT, AXL, ERBB2, GLI3, ITPKB, NFATC1, NOTCH1, NOTCH3, NTN1, TGFB1                                         |

Appendix 1 to Pan S, Zhou Y, Yan L, et al. TGF- $\beta$ 1 is associated with deficits in cognition and cerebral cortical thickness in first-episode schizophrenia. *J Psychiatry Neurosci* 2022. doi: 10.1503/jpn.210121

Copyright © 2022 The Author(s) or their employer(s).

To receive this resource in an accessible format, please contact us at [cmajgroup@cmaj.ca](mailto:cmajgroup@cmaj.ca).

Online appendices are unedited and posted as supplied by the authors.

|            |                                                        |    |      |          |                                                                                              |
|------------|--------------------------------------------------------|----|------|----------|----------------------------------------------------------------------------------------------|
|            | positive regulation of macromolecule                   |    |      |          | AGT,ERBB2,GLI3,MAPKAPK2,NFATC1,NOTCH1,NOTCH3,PDGFRB,SREBF1,TGFB1,TP53,ZFHX3                  |
| GO:0010557 | biosynthetic process                                   | 12 | 1758 | 3.26E-05 |                                                                                              |
| GO:0001822 | kidney development                                     | 6  | 251  | 3.40E-05 | AGT,GLI3,NOTCH1,NOTCH3,PDGFRB,TGFB1                                                          |
| GO:0007568 | aging                                                  | 6  | 255  | 3.66E-05 | AGT,PDGFRB,SREBF1,TGFB1,TP53,UCP2                                                            |
|            | positive regulation of lipid metabolic process         |    |      |          |                                                                                              |
| GO:0045834 | metabolic process                                      | 5  | 135  | 3.76E-05 | AGT,FGFR3,PDGFRB,SREBF1,TGFB1                                                                |
|            | regulation of leukocyte differentiation                |    |      |          |                                                                                              |
| GO:1902105 | differentiation                                        | 6  | 261  | 4.06E-05 | AXL,CSF1,ERBB2,GLI3,ITPKB,TGFB1                                                              |
|            | positive regulation of cellular metabolic process      |    |      |          | AGT,CSF1,ERBB2,FGFR3,GLI3,MAPKAPK2,NFATC1,NOTCH1,NOTCH3,PDGFRB,PTBP1,SREBF1,TGFB1,TP53,ZFHX3 |
| GO:0031325 | cellular metabolic process                             | 15 | 3060 | 4.07E-05 |                                                                                              |
|            | positive regulation of leukocyte differentiation       |    |      |          |                                                                                              |
| GO:1902107 | leukocyte differentiation                              | 5  | 139  | 4.07E-05 | AXL,CSF1,GLI3,ITPKB,TGFB1                                                                    |
|            | positive regulation of macromolecule metabolic process |    |      |          | AGT,CSF1,ERBB2,FGFR3,GLI3,MAPKAPK2,NFATC1,NOTCH1,NOTCH3,PDGFRB,PTBP1,SREBF1,TGFB1,TP53,ZFHX3 |
| GO:0010604 | process                                                | 15 | 3081 | 4.22E-05 |                                                                                              |
|            | positive regulation of gene expression                 |    |      |          | AGT,CSF1,ERBB2,GLI3,MAPKAPK2,NFATC1,NOTCH1,NOTCH3,SREBF1,TGFB1,TP53,ZFHX3                    |
| GO:0010628 | expression                                             | 12 | 1826 | 4.22E-05 |                                                                                              |
|            | positive regulation of cellular biosynthetic process   |    |      |          | AGT,ERBB2,GLI3,MAPKAPK2,NFATC1,NOTCH1,NOTCH3,PDGFRB,SREBF1,TGFB1,TP53,ZFHX3                  |
| GO:0031328 | process                                                | 12 | 1846 | 4.55E-05 |                                                                                              |
|            | response to external stimulus                          |    |      |          | AGT,AXL,ERBB2,GLI3,MAPKAPK2,NOTCH1,NOTCH3,PDGFRB,SREBF1,TGFB1,TP53,UCP2                      |
| GO:0009605 | stimulus                                               | 12 | 1857 | 4.72E-05 |                                                                                              |

|            |                                                                      |    |      |          |                                                                                                            |
|------------|----------------------------------------------------------------------|----|------|----------|------------------------------------------------------------------------------------------------------------|
| GO:0048731 | system development                                                   | 17 | 4144 | 4.72E-05 | AGT,AXL,CABLES1,CSF1,ERBB2,FGFR3,GLI3,ITPKB,MAPKAPK2,NOTCH1,NOTCH3,NTN1,PDGFRB,SREBF1,TGFB1,UCP2,ZFH3      |
| GO:0007275 | multicellular organism development                                   | 18 | 4726 | 4.90E-05 | AGT,AXL,CABLES1,CSF1,ERBB2,FGFR3,GLI3,ITPKB,MAPKAPK2,NOTCH1,NOTCH3,NTN1,PDGFRB,SREBF1,TGFB1,TP53,UCP2,ZFH3 |
| GO:0045597 | positive regulation of cell differentiation                          | 9  | 908  | 4.90E-05 | AGT,AXL,CSF1,GLI3,ITPKB,NOTCH1,NTN1,TGFB1,ZFH3                                                             |
| GO:0006468 | protein phosphorylation negative regulation of Wnt signaling pathway | 9  | 923  | 5.34E-05 | AGT,AXL,ERBB2,FGFR3,ITPKB,LATS2,MAPKAPK2,PDGFRB,TGFB1                                                      |
| GO:0030178 | positive regulation of protein kinase B signaling                    | 5  | 155  | 5.72E-05 | GLI3,LATS2,NFATC1,NOTCH1,RNF43                                                                             |
| GO:0051897 | positive regulation of protein phosphorylation                       | 5  | 157  | 6.01E-05 | AXL,ERBB2,FGFR3,PDGFRB,TGFB1                                                                               |
| GO:0001934 | regulation of lymphocyte differentiation                             | 9  | 941  | 6.02E-05 | AGT,CSF1,ERBB2,FGFR3,MAPKAPK2,NOTCH1,PDGFRB,TGFB1,TP53                                                     |
| GO:0045619 | oligodendrocyte differentiation                                      | 5  | 158  | 6.02E-05 | AXL,ERBB2,GLI3,ITPKB,TGFB1                                                                                 |
| GO:0048709 | cellular response to growth factor stimulus                          | 4  | 66   | 6.02E-05 | ERBB2,GLI3,NOTCH1,TGFB1                                                                                    |
| GO:0071363 | regulation of transferase activity                                   | 7  | 477  | 6.51E-05 | ERBB2,FGFR3,MAPKAPK2,NOTCH1,PDGFRB,PTBP1,TGFB1                                                             |
| GO:0051338 |                                                                      | 9  | 964  | 6.89E-05 | AGT,CSF1,ERBB2,FGFR3,LATS2,MAPKAPK2,PDGFRB,TGFB1,TP53                                                      |

Appendix 1 to Pan S, Zhou Y, Yan L, et al. TGF- $\beta$ 1 is associated with deficits in cognition and cerebral cortical thickness in first-episode schizophrenia. *J Psychiatry Neurosci* 2022. doi: 10.1503/jpn.210121

Copyright © 2022 The Author(s) or their employer(s).

To receive this resource in an accessible format, please contact us at cmajgroup@cmaj.ca.

Online appendices are unedited and posted as supplied by the authors.

|            |                                              |    |      |          |                                                                                                                                              |
|------------|----------------------------------------------|----|------|----------|----------------------------------------------------------------------------------------------------------------------------------------------|
| GO:0042127 | regulation of cell population proliferation  | 11 | 1594 | 6.94E-05 | AGT,CSF1,ERBB2,FGFR3,GLI3,NOTCH1,NOTCH3,NTN1,PDGFRB,TGFB1,TP53                                                                               |
| GO:0071496 | cellular response to external stimulus       | 6  | 305  | 7.04E-05 | AGT,AXL,SREBF1,TGFB1,TP53,UCP2                                                                                                               |
| GO:0072012 | glomerulus vasculature development           | 3  | 18   | 7.04E-05 | NOTCH1,NOTCH3,PDGFRB                                                                                                                         |
| GO:0035265 | organ growth                                 | 4  | 71   | 7.13E-05 | AGT,FGFR3,NOTCH1,PDGFRB                                                                                                                      |
| GO:0051094 | positive regulation of developmental process | 10 | 1286 | 7.70E-05 | AGT,AXL,CSF1,GLI3,ITPKB,NOTCH1,NTN1,PDGFRB,TGFB1,ZFH3                                                                                        |
| GO:0031065 | positive regulation of histone deacetylation | 3  | 19   | 7.74E-05 | SREBF1,TGFB1,TP53                                                                                                                            |
| GO:0008152 | metabolic process                            | 24 | 9569 | 7.94E-05 | AGT,AXL,CSF1,EHMT1,ERBB2,FGFR3,GLI3,H6PD,ITPKB,LATS2,MAPKAPK2,MOV10,NFATC1,NOTCH1,NOTCH3,PDGFRB,PTBP1,RNF43,SOD3,SREBF1,TGFB1,TP53,UCP2,ZFH3 |
| GO:0051253 | negative regulation of RNA metabolic process | 10 | 1303 | 8.40E-05 | EHMT1,GLI3,MAPKAPK2,NOTCH1,NOTCH3,PTBP1,SREBF1,TGFB1,TP53,ZFH3                                                                               |
| GO:0070482 | response to oxygen levels                    | 6  | 321  | 8.58E-05 | NOTCH1,PDGFRB,SOD3,TGFB1,TP53,UCP2                                                                                                           |
| GO:0010629 | negative regulation of gene expression       | 11 | 1670 | 9.50E-05 | AGT,EHMT1,GLI3,MOV10,NOTCH1,NOTCH3,PTBP1,SREBF1,TGFB1,TP53,ZFH3                                                                              |

**Table S7. CMC\_DLPCF WGCNA\_TGF $\beta$ 1 coexpressed\_SCZ\_enrichment.Process\_cluster\_FDR > 10e-5**

| term ID | term description | observed gene count | background gene count | false discovery rate | matching proteins in network (labels) |
|---------|------------------|---------------------|-----------------------|----------------------|---------------------------------------|
|---------|------------------|---------------------|-----------------------|----------------------|---------------------------------------|

Appendix 1 to Pan S, Zhou Y, Yan L, et al. TGF- $\beta$ 1 is associated with deficits in cognition and cerebral cortical thickness in first-episode schizophrenia. *J Psychiatry Neurosci* 2022. doi: 10.1503/jpn.210121

Copyright © 2022 The Author(s) or their employer(s).

To receive this resource in an accessible format, please contact us at cmajgroup@cmaj.ca.

Online appendices are unedited and posted as supplied by the authors.

|            |                                     |   |     |          |                                                   |
|------------|-------------------------------------|---|-----|----------|---------------------------------------------------|
| GO:0030198 | extracellular matrix organization   | 9 | 296 | 1.33E-10 | BCAN,BGN,FBLN1, FN1 ,HSPG2,ITGA7,LAMB2,NCAN,TGFB1 |
| GO:0006027 | glycosaminoglycan catabolic process | 5 | 62  | 3.89E-07 | BCAN,BGN,HSPG2,NCAN,TGFB1                         |
| GO:0030203 | glycosaminoglycan metabolic process | 5 | 153 | 1.80E-05 | BCAN,BGN,HSPG2,NCAN,TGFB1                         |

**Table S8. Genes coexpressed with TGF- $\beta$ 1 in the DLPFCs of healthy subjects and SCZ patients**

|                                        | Healthy controls                                                                                                                                                        | SCZ patients                                                             |
|----------------------------------------|-------------------------------------------------------------------------------------------------------------------------------------------------------------------------|--------------------------------------------------------------------------|
| <b>Non-overlapping genes</b>           | <i>SREBF1, PDGFRB, NTN1, MAPKAPK2, MOV10, RNF43, AGT, ERBB2, FGFR3, PTBP1, ZFH3, UCP2, CABLES1, ITPKB, NFATC1, SOD3, LATS2, NOTCH1, GLI3, H6PD, EHMT1, NOTCH3, TP53</i> | <i>BCAN, FN1, TLN1, WFS1, ITGA7, LAMB2, BGN, FBLN1, PXN, HSPG2, NCAN</i> |
| <b>Overlapping genes</b>               | <i>AXL, CSF1</i>                                                                                                                                                        | <i>AXL, CSF1</i>                                                         |
| <b>Biological Process (GO) and FDR</b> | GO:0007166: cell surface receptor signaling pathway, FDR: 1.37e-08<br>GO:0050793: regulation of developmental process, FDR: 3.39e-08                                    | GO:0030198: extracellular matrix organization, FDR: 1.33e-10             |

**Table S9. Average thickness of the visual cortex and associated cortical areas**

| Area (mm) | SCZ | Controls | <i>t</i> | <i>Adj.p</i> |
|-----------|-----|----------|----------|--------------|
|-----------|-----|----------|----------|--------------|

Appendix 1 to Pan S, Zhou Y, Yan L, et al. TGF- $\beta$ 1 is associated with deficits in cognition and cerebral cortical thickness in first-episode schizophrenia. *J Psychiatry Neurosci* 2022. doi: 10.1503/jpn.210121

Copyright © 2022 The Author(s) or their employer(s).

To receive this resource in an accessible format, please contact us at [cmajgroup@cmaj.ca](mailto:cmajgroup@cmaj.ca).

Online appendices are unedited and posted as supplied by the authors.

|                        |                   |                   |              |                  |
|------------------------|-------------------|-------------------|--------------|------------------|
| <b>L-LOC thickness</b> | <b>2.18(0.13)</b> | <b>2.28(0.99)</b> | <b>-3.9</b>  | <b>&lt;0.001</b> |
| <b>R-LOC thickness</b> | <b>2.23(0.15)</b> | <b>2.34(0.13)</b> | <b>-3.74</b> | <b>&lt;0.001</b> |
| <b>L-IPC thickness</b> | <b>2.49(0.15)</b> | <b>2.59(0.98)</b> | <b>-4.4</b>  | <b>&lt;0.001</b> |
| <b>R-IPC thickness</b> | <b>2.49(0.16)</b> | <b>2.63(0.11)</b> | <b>-5</b>    | <b>&lt;0.001</b> |
| <b>L-SMG thickness</b> | <b>2.58(0.13)</b> | <b>2.70(0.16)</b> | <b>-4.1</b>  | <b>&lt;0.001</b> |
| <b>R-SMG thickness</b> | <b>2.56(0.14)</b> | <b>2.68(0.11)</b> | <b>-4.56</b> | <b>&lt;0.001</b> |

All data were reported as mean (SD). LOC: Lateral occipital cortex; IPC: Inferior parietal cortex; SMG: Supramarginal gyrus.
